# Supplementary material for: Preventive zinc supplementation for children, and the effect of additional iron: a systematic review and meta-analysis
Source: PubMed Central journal article supplement — BMJ Open. 2014 Jun 19;4(6):e004647. doi: 10.1136/bmjopen-2013-004647 (PMC4067863; doi:10.1136/bmjopen-2013-004647), 2014-06-19
Supplement: bmjopen-2013-004647.draft_revisions.pdf [file bmjopen-2013-004647.draft_revisions.pdf]

# BMJ Open

## Preventive zinc supplementation for children, and the effect of additional iron: A systematic review and meta-analysis

|                                 |                                                                                                                                                                                                                                                                                                     |
|---------------------------------|-----------------------------------------------------------------------------------------------------------------------------------------------------------------------------------------------------------------------------------------------------------------------------------------------------|
| Journal:                        | <i>BMJ Open</i>                                                                                                                                                                                                                                                                                     |
| Manuscript ID:                  | bmjopen-2013-004647                                                                                                                                                                                                                                                                                 |
| Article Type:                   | Research                                                                                                                                                                                                                                                                                            |
| Date Submitted by the Author:   | 09-Dec-2013                                                                                                                                                                                                                                                                                         |
| Complete List of Authors:       | Mayo-Wilson, Evan; UCL, Clinical, Educational & Health Psychology<br>Imdad, Aamer; SUNY Upstate Medical University, Department of Pediatrics<br>Junior, Jean; Harvard, Medical School<br>Dean, Sohni; Albert Einstein Medical Center,<br>Bhutta, Zulfiqar; SickKids Center for Global Child Health, |
| <b>Primary Subject Heading</b>: | Global health                                                                                                                                                                                                                                                                                       |
| Secondary Subject Heading:      | Nutrition and metabolism, Public health, Paediatrics                                                                                                                                                                                                                                                |
| Keywords:                       | PREVENTIVE MEDICINE, PUBLIC HEALTH, Clinical trials < THERAPEUTICS,<br>Nutrition < TROPICAL MEDICINE                                                                                                                                                                                                |
|                                 |                                                                                                                                                                                                                                                                                                     |

SCHOLARONE™  
Manuscripts

only

1 **Preventive zinc supplementation for children, and the effect of additional iron: A systematic**  
2 **review and meta-analysis**

3 Evan Mayo-Wilson (DPhil),<sup>1</sup> Aamer Imdad (MD),<sup>2</sup> Jean Junior (MSc),<sup>3</sup> Sohni Dean (MD),<sup>4</sup> Zulfiqar  
4 A. Bhutta (PhD)<sup>5</sup>

5  
6  
7 <sup>1</sup> Assistant Scientist  
8 Center for Clinical Trials  
9 Department of Epidemiology  
10 Johns Hopkins Bloomberg School of Public Health  
11 615 North Wolfe Street, E6610  
12 Baltimore, MD 21205  
13 USA

14 <sup>2</sup> Pediatric Resident  
15 Department of Pediatrics  
16 SUNY Upstate Medical University  
17 Syracuse, New York  
18 USA

19 <sup>3</sup> Medical Student  
20 Harvard Medical School  
21 107 Avenue Louis Pasteur  
22 Boston, MA 02115  
23 USA

24 <sup>4</sup> Paediatric Resident  
25 Albert Einstein Medical Center  
26 5501 Old York Road  
27 Philadelphia, Pennsylvania 19141  
28 USA

29 <sup>5</sup> Robert Harding Chair in Global Child Health, SickKids Center for Global Child Health,  
30 555 University Avenue  
31 Toronto M5G 1X8, Canada &  
32 Founding Director  
33 Center of Excellence in Women and Child Health  
34 The Aga Khan University, Karachi, Pakistan  
35 Correspondence to: zulfiqar.bhutta@sickkids.ca  
36  
37  
38  
39  
40  
41  
42  
43  
44  
45  
46  
47  
48  
49  
50  
51  
52  
53  
54  
55  
56  
57  
58  
59  
60

## ABSTRACT

### Objective

Zinc deficiency is widespread, and preventive supplementation may have benefits in young children. Effects for children over 5 years of age, and effects when coadministered with other micronutrients are uncertain. These are obstacles to scale-up. This review seeks to determine if preventive supplementation reduces mortality and morbidity for children ages 6 months to 12 years.

### Design

Systematic review conducted with the Cochrane Developmental, Psychosocial and Learning Problems Group. Two reviewers independently assessed studies. Meta-analyses were performed for mortality, illness, and side effects.

### Data sources

We searched multiple databases, including CENTRAL and Medline in January 2013. Authors were contacted for missing information.

### Eligibility criteria for selecting studies

Randomised trials of preventive zinc supplementation. Hospitalised children and children with chronic diseases were excluded.

### Results

Eighty randomised trials with 205401 participants were included. There was a small but non-significant effect on all-cause mortality (risk ratio 0.95 [95% CI 0.86 to 1.05]). Supplementation may reduce incidence of all-cause diarrhoea (risk ratio 0.87 [0.85 to 0.89]), but there was evidence of reporting bias. There was no evidence of an effect of incidence or prevalence of respiratory infections or malaria. There was moderate quality evidence of a very small effect on linear growth (SMD 0.09 [0.06 to 0.13]) and an increase in vomiting (RR 1.29 [1.14 to 1.46]). There was no evidence of an effect on iron status. Comparing zinc with and without iron co-supplementation and direct comparisons of zinc plus iron versus zinc administered alone favoured co-intervention for some outcomes and zinc alone for other outcomes. Effects may be larger for children over one year of age, but most differences were not significant.

### Conclusions

Benefits of preventive zinc supplementation may outweigh any potential adverse effects in areas where risk of zinc deficiency is high. Further research should determine optimal intervention characteristics and delivery strategies.

## STRENGTHS AND LIMITATIONS OF THIS STUDY

This large review was conducted according to best practices and includes the highest quality current evidence about the effects of zinc supplementation.

We investigated several outcomes made multiple comparisons to explore the most important main effects and interactions.

The analyses in this review could not identify the best way to deliver zinc supplements to children in need.

## INTRODUCTION

Regular dietary zinc intake is required because zinc cannot be produced or stored.<sup>1,2</sup> In 2011, 116000 deaths in children under 5 years were attributable to zinc deficiency (1.7% of mortalities in this group).<sup>3</sup>

Previous reviews reach disparate conclusions about the benefits of zinc supplementation for young children,<sup>4-12</sup> and most have not examined evidence for children over 5 years of age. Zinc deficiency is prevalent in areas with other micronutrient deficiencies. Concerns about the administration of zinc with iron have been an obstacle to widespread delivery.<sup>13</sup> Understanding the effects of preventive zinc supplementation alone and with iron is crucially important to the future of global health policy.

To evaluate the effects of zinc with or without iron on illness and mortality, as well as growth, we analysed direct comparisons (i.e. zinc plus iron versus zinc alone) as well as subgroups within an overall analysis.

## METHODS

### Selection criteria and search strategy

Following a published protocol,<sup>14</sup> we conducted a systematic review of randomised clinical trials (RCTs) of orally administered zinc compared with placebo and non-zinc co-interventions received by both groups (e.g. vitamin A). We also compared zinc with and without iron co-supplementation. Participants were six months to 12 years of age. We excluded studies of food fortification and children who were acutely ill.

We searched African Index Medicus, CENTRAL, Conference Proceedings Citation Index, EMBASE, Global Health, ICTRP, IndMED, LILACS, MEDLINE, metaRegister of Controlled Trials, ProQuest Dissertations & Theses Database, and WHOLIS in December 2012 and January 2013 (Appendix 1). Reference lists from previous reviews and from included studies were examined, and trial authors were contacted for unpublished data. Two authors independently reviewed citations and extracted data, including participant demographics, details of the intervention, outcomes, and risk of bias.<sup>15</sup>

### Data synthesis

Relative risks and 95% confidence intervals (CIs) were calculated using Mantel-Haenszel methods. Standardised mean differences (SMDs) and 95% CIs were calculated for continuous measures using Hedges *g* and combined using inverse variance methods. When studies reported data in multiple formats, we calculated the SMD and its standard error in Comprehensive Meta-Analysis (CMA) Version 2 before entering data in Review Manager (RevMan) Version 5.2. For incidence data, we combined risk ratios (events per child) and rate ratios (events per child year) because trials were relatively short and we did not anticipate interactions between the intervention and time at risk. For cluster-randomised trials, we used effects controlling for clustering, or we used an intra-cluster correlation coefficient (ICC) to estimate robust standard errors.<sup>15</sup> We used fixed-effect methods for all meta-analyses. Effects favour intervention when the relative risk is reduced (RR<1) or the standardised difference is positive (SMD>0).

When 10 or more studies reported an outcome, we conducted subgroup analyses to explore the effects of iron co-supplementation, national income (low-income countries compared with others), stunting, age (6-12 months, more than 12 months), dose (0-5mg, 5-10mg, etc.), duration (0-6 months, 6-12 months, more than 12 months), and formulation.

### Quality of the evidence

Quality of the evidence was judged independently using GRADE.<sup>16</sup> The GRADE system rates evidence from each analysis (i.e., pooled data where possible) as “high”, “moderate”, “low” or “very low”. A “high” rating suggests that evidence is unlikely to be affected by further studies; a “low” rating suggests that further research is required to confirm the direction and magnitude of the true effect. Ratings for meta-analyses of randomised controlled trials start at “high” and may be downgraded for threats to internal validity (i.e. within-study bias), inconsistency (i.e. heterogeneity in results across studies), indirectness (e.g. measures are proxies for the true outcome of interest), imprecision (e.g. few participants, wide confidence intervals), and reporting bias (i.e. publication bias and selective outcome reporting). Because GRADE considers several domains in addition to internal validity, confidence in overall effects may be “low” or “very low” even when all studies were conducted rigorously. The following sections include both significant and non-significant statistical results, and GRADE ratings in the text and tables provide further information about our confidence in these estimates.

## RESULTS

### Results of the search

From 6384 records, 80 studies were included (Figure 1). Seventy-five studies were published in English, two each in Spanish and Portuguese, one in Chinese. Reasons for excluding 27 studies were enumerated (Appendix 2); additionally, 11 on-going studies were identified, and 5 studies could not be obtained. Seven included studies did not contribute to any meta-analysis because they did not report sufficient data (Appendix 3).

### Study characteristics

Included studies assigned 205923 eligible participants (Appendix 4). Twenty trials used factorial designs; there were 100 independent comparisons isolating zinc, and co-interventions were provided to both groups in 51 comparisons. There were 8 independent comparisons of iron with zinc versus zinc alone including 1898 eligible participants. Sample sizes ranged from 21 to 72438 eligible participants (median=200). Nine studies were cluster-randomised, including two randomising households. Three studies included 88% of participants.<sup>17-19</sup> Forty-six studies reported the mean baseline plasma or serum zinc concentration of their participants; the median of these mean concentrations was 72.5 µg/dL.

Thirty-two countries are represented; most studies were conducted in low- or middle-income countries: 37 in Asia, 26 in Latin America and the Caribbean, and 10 in sub-Saharan Africa. The median of mean age at baseline was 28 months, and 22 studies included children over 5 years of age. Both stunted and non-stunted children were included in 42 studies; 5 included only stunted children, 5 included only non-stunted children, and 28 did not specify if participants were stunted.

Studies provided zinc for less than 6 months (30), 6 to 12 months (33), and 12 months or more (16). Of those reporting frequency of zinc supplementation, 48 provided zinc daily and 11 provided zinc weekly. Where reported, daily dose was 0 to 5 mg (5), 5 to 10 mg (19), 10 to 15 mg (30), 15 to 20 mg (8), and 20 mg or more (12). Studies reporting the chemical compound of their zinc supplements provided zinc as sulfate (45), gluconate (12), acetate (six), and other compounds (8). Studies comparing zinc with iron versus zinc alone provided daily dose equivalents of 3 to 36 mg of iron. Outcomes were observed for about 26 weeks (median) after randomisation, with follow-up from 2 to 80 weeks.

### Risk of bias

Randomisation and allocation concealment were adequate in 34 and 32 studies; 46 and 48 studies were unclear (Figure 2). For blinding of participants and personnel, 63 studies were at low risk of bias. For blinding of outcome assessment, 65 studies were at low risk of bias. For both types of blinding, 15 studies were unclear.

For all analyses, we attempted to include all randomised study participants; 47 studies were at low risk of bias for incomplete data, 31 were unclear, and 2 were at high risk. For selective reporting, 3 studies were at low risk of bias, 44 were at unclear risk, and 32 were at high risk (Appendix 5).

Bias may affect secondary outcomes in this review, but it does not appear to be important for the primary outcome. For example, mortality and other objective measures are not vulnerable to bias related to blinding, and many missing outcomes were biomarkers or growth related.

### Effects of zinc supplementation

In addition to outcomes included in the Summary of Findings Table (Table 1), we analysed results for hospitalisation; prevalence of morbidities; additional measures of growth; as well as biological indicators of zinc, haemoglobin, iron, and copper status (Table 2). Subgroup analyses compare the effects of zinc supplementation with and without iron coadministration (Table 4, Appendix 6).

Fourteen studies including 138302 participants were analysed for all-cause mortality, though other studies included no deaths in either group (Figure 3), and there was high quality evidence of a small effect (risk ratio 0.95 [0.86 to 1.05]). There were similar effects for mortality due to diarrhoea (RR 0.95 [0.69 to 1.31]), mortality due to LRTI (RR 0.86 [0.64 to 1.15]), and mortality due to malaria (RR 0.90 [0.77 to 1.06]), and the evidence for these outcomes was moderate quality.

In 25 studies including 15042 participants, there was low quality evidence of a 13% reduction in incidence of all-cause diarrhoea (Figure 4; RR 0.87 [0.85 to 0.89]). Other measures of diarrhoea were consistent with no difference or with a small reduction in morbidity, including: prevalence of all-cause

1 diarrhoea, hospitalisation due to all-cause diarrhoea, incidence of severe diarrhoea, prevalence of  
2 severe diarrhoea, incidence of persistent diarrhoea, and prevalence of persistent diarrhoea.

3  
4 In twelve trials (9610 participants), there was high quality evidence of no effect on LRTI incidence  
5 (Appendix 7; RR 1.00 [0.94 to 1.07]). One trial reported no LRTI in either group.<sup>20</sup> Results for  
6 prevalence were consistent with no difference in respiratory morbidity.

7  
8 Four trials (2407 participants) found moderate quality evidence that would be consistent with no  
9 effect or a harmful effect on malaria incidence (RR 1.04 [0.94, 1.14]). One study reported no  
10 significant effect on malaria prevalence.

11  
12 Fifty studies reported height for 13669 participants (Figure 5). There was moderate quality evidence  
13 of a very small but statistically significant increase in linear growth (SMD 0.09 [0.06 to 0.13]).  
14 Results for weight, weight-to-height ratio and prevalence of stunting were consistent with no  
15 difference or a small effect on growth.

16  
17 Forty-six studies reported serum zinc for 9810 participants. There was evidence of a medium effect  
18 (SMD 0.62 [0.58 to 0.67]) on zinc concentration. Results consistently favoured zinc rather than no-  
19 intervention, but they were extremely inconsistent in magnitude, possibly due to differences in  
20 participants and settings ( $\text{Chi}^2=582.45$ ,  $\text{df}=47$  ( $P < 0.00001$ );  $I^2=91\%$ ). Eleven studies reported serum  
21 copper for 3071 participants (1% of participants in this review). There was very low quality evidence  
22 of a small reduction in copper (SMD -0.22 [-0.29 to 0.14]); as above, the results were inconsistent  
23 ( $\text{Chi}^2=37.47$ ,  $\text{df}=10$  ( $P < 0.0002$ );  $I^2=68\%$ ). There was no evidence of an effect on haemoglobin,  
24 prevalence of anaemia, or iron status.

25  
26 In five trials (35192 participants) there was high quality evidence of increased vomiting (RR 1.29  
27 [1.14 to 1.46]). Two trials reported no adverse events in either group (i.e. supplemented or non-  
28 supplemented).<sup>21,22</sup> Results for study withdrawal, participants with one or more side effects, and  
29 number of vomiting episodes indicate some short-term side effects; there was no evidence of serious  
30 adverse events.

### 30 **Effects of zinc plus iron compared with zinc alone**

31 Effects on mortality were not significantly different between subgroups with and without iron  
32 ( $\text{Chi}^2=1.30$ ,  $p=0.25$ ); however, there was no mortality effect in groups receiving iron (RR 0.99 [0.86  
33 to 1.15]) while the effect for groups that did not receive iron was nearly significant (RR 0.89 [0.79 to  
34 1.00]). Effects on incidence of diarrhoea differed between groups (Figure 4;  $\text{Chi}^2=65.11$ ,  $p < 0.00001$ ),  
35 with no benefit for the group that received iron (RR 1.00 [0.96 to 1.05]) and a significant benefit for  
36 the group that did not receive iron (RR 0.82 [0.80 to 0.84]). There were significant effects with and  
37 without iron co-supplementation on zinc status; these were greater in the studies without iron for  
38 serum zinc ( $\text{Chi}^2=27.07$ ,  $p < 0.00001$ ) and prevalence of zinc deficiency ( $\text{Chi}^2=34.27$ ,  $p < 0.00001$ ).  
39 There were also differences between these groups of studies for serum ferritin and serum copper; zinc  
40 had no effect in studies with iron co-intervention, but zinc without iron co-intervention reduced  
41 ferritin and copper. Overall effects on growth were small; there was a significant difference between  
42 subgroups for height but not weight, and the difference for weight-to-height ratio favoured the group  
43 that received iron (i.e. the opposite of other results). There were no significant effects in either  
44 subgroup for lower respiratory tract infections, serum haemoglobin, prevalence of anaemia, or  
45 prevalence of iron deficiency.

46  
47 Several trials compared zinc coadministered with iron versus zinc given alone (Appendix 6). One trial  
48 reported no significant difference in all-cause mortality (323 participants; RR 0.33 [0.01 to 8.39]). In  
49 five trials (1530 participants), effects on incidence of all-cause diarrhoea favoured zinc alone (RR  
50 1.10 [1.03 to 1.18]). In one trial (399 participants), effects on prevalence of all-cause diarrhoea  
51 favoured zinc with iron, but this was not significant (RR 0.90 [0.79 to 1.06]). Five trials (1329  
52 participants) reported no difference in height (SMD 0.06 [-0.04 to 0.16]). There was similarly low  
53 quality evidence and mixed results for other outcomes (Table 3).

### 53 **Additional subgroup analyses**

54 Studies in high-income countries did not evaluate most outcomes, so we were unable to explore  
55 differences in effect by national income. Effects on weight and weight-to-height ratio were not  
56 statistically different, and there was no evidence of consistent differences in biological outcomes  
57 (Appendix 6).

1 Most studies included both stunted and non-stunted children, and it was not possible to compare  
2 effects between studies for most outcomes. Differences between groups were not significant for  
3 growth, but these would be consistent with larger effects in studies of stunted children.  
4

5 Age was not significantly associated with effects on mortality or incidence diarrhoea, but results  
6 would be consistent with greater benefits in children over 1 year of age (Figure 3). Effects on weight  
7 were greatest in studies of older children, and there was a similar pattern for height, though the largest  
8 study of children over 5 years of age included only 804 participants. The effect of supplementation on  
9 zinc deficiency was greater in studies of older children, as was the negative effect on copper. There  
10 was no evidence of consistent differences in other biological outcomes.

11 Dose was not significantly associated with effects on mortality, incidence of LRTI, haemoglobin, or  
12 weight-to-height ratio. The pattern of results was inconsistent for incidence and prevalence of  
13 diarrhoea, height, weight, and plasma ferritin (Appendix 6). Subgroups were significantly different for  
14 serum zinc, prevalence of zinc deficiency, prevalence of iron deficiency, and plasma copper; only  
15 these results are consistent with a dose-response relationship.  
16

17 Duration of supplementation was not significantly associated with effects on mortality, incidence of  
18 diarrhoea, incidence of LRTI, or weight-to-height ratio, or prevalence of iron deficiency (Appendix  
19 6). There was a significant difference for prevalence of diarrhoea, but the magnitude of this difference  
20 may not be important. Studies of longer supplementation were associated with greater effects on  
21 height; the pattern of results was not consistent for weight. By contrast, the largest benefits for  
22 biological markers (serum zinc and prevalence of zinc deficiency) were reported in the shortest  
23 studies.  
24

25 Formulation was associated with differences among subgroups, though few studies included capsules  
26 or powder. Comparing solution and tablets, differences were not significant for mortality, incidence  
27 and prevalence of diarrhoea, incidence of LRTI, blood haemoglobin, prevalence of anaemia, or  
28 prevalence of iron deficiency. There were significant differences in the effects of serum ferritin and  
29 serum copper, but only three studies of each outcome used tablets, and they were highly  
30 heterogeneous. Effects on height, weight, and serum zinc were greater in studies using solution  
31 compared with tablet, but all effects were small (Appendix 6).

### 32 **Reporting bias**

33 For outcomes included in the Summary of Findings Table with 10 or more studies, we also conducted  
34 a trim-and-fill analysis to investigate reporting bias (Appendix 8).<sup>23</sup> There was some evidence of small  
35 study bias—studies were trimmed for all-cause mortality (1 trimmed) and incidence of all-cause  
36 diarrhoea (13 trimmed; Figure 6). None were trimmed for incidence of LRTI, nor were any trimmed  
37 for height. The adjusted effect for mortality was not importantly different from the observed effect,  
38 but the observed effect for diarrhoea (RR 0.87 [0.85 to 0.89]) was larger than the adjusted value (RR  
39 0.95 [0.93 to 0.97]).

### 40 **DISCUSSION**

41 Consistent with previous reviews, this review finds high quality evidence from several large, well-  
42 conducted trials.<sup>5,7,10</sup> We believe that these results suggest zinc supplementation is probably  
43 associated with a small reduction in all-cause mortality for children at risk of deficiency. In  
44 interpreting these results, we considered that the results of this meta-analysis are drawn from 13 trials  
45 including almost 140,000 participants. The results of those studies are statistically consistent, the  
46 overall confidence intervals are relatively small, and the balance of probability favours zinc  
47 supplementation rather than placebo. Small reductions in cause-specific mortality were consistent  
48 with effects on illness and cause-specific mortality, and the results were biologically plausible.  
49 Benefits in any specific are may be related to level of deficiency; countries with very high levels of  
50 deficiency could expect the largest reductions in mortality as a result of supplementation.<sup>24</sup> This  
51 review also suggests that benefits may not be restricted to young children; there is some evidence of  
52 benefits on secondary outcomes in trials including children over 5 years of age, but there is a lack of  
53 evidence about effects on mortality in this group.

54 Results for secondary outcomes suggest modest benefits. Main results for diarrhoea morbidity were  
55 consistent with previous reviews,<sup>4,5,7,10</sup> but an asymmetrical funnel plot was indicative of small-study  
56 bias. After adjustment, the effect for diarrhoea was halved, and the reduced estimate was consistent  
57 with other critical outcomes in this review. Previous reviews have also suggested beneficial effects on  
58 respiratory infections<sup>4,5,9-12</sup> and malaria,<sup>10</sup> which this review does not confirm. Previous reviews have  
59 reported variable effects on growth;<sup>5,6,8</sup> this review suggests that preventive zinc supplementation  
60

1 alone is unlikely to have large effects on linear growth and morbidity. Supplementation is associated  
2 with increased risk of vomiting, but there is no evidence of lasting adverse effects.  
3

4 Critical outcomes included data for 2407 to 138302 participants, so further placebo-controlled trials of  
5 preventive zinc supplementation for young children may not be necessary. However, subgroup  
6 analyses did not identify an optimal supplementation strategy (i.e. dose, formulation, and frequency),  
7 and large trials comparing active interventions could inform clinical guidelines. Subgroup analyses  
8 identify some sources of observed heterogeneity; however, subgroups that were statistically different  
9 included a large amount of residual heterogeneity, which is reflected in our judgements about the  
10 quality of the evidence (Table 1). Analyses of group-level data are of limited value for identifying  
11 moderators, particularly in analyses dominated by a few large studies. Further analyses of individual  
12 patient data would be more conclusive.

13 Effects on biological indicators were inconsistent across studies, but large effects on these measures  
14 were not always reflected in clinical outcomes. Supplementation may increase serum zinc, but the  
15 magnitude of the effect appears to differ across populations and interventions. Effects on other  
16 micronutrients, including iron and copper, are uncertain. Researchers have suggested that iron  
17 supplementation may interfere with the absorption of zinc and, conversely, that zinc may interfere  
18 with iron and copper absorption;<sup>25,26</sup> however, the relationships between these biomarkers and clinical  
19 outcomes (i.e. mortality and morbidities) have not been established.

20 Subgroup analyses comparing zinc with and without iron did not resolve uncertainty about the effect  
21 of co-supplementation. Only four studies with iron co-supplementation reported mortality outcomes,  
22 and evidence of outcome reporting bias for diarrhoea incidence leads to cautious interpretation of  
23 differences in this outcome. There was no evidence that larger doses or increased duration were  
24 associated with increased iron deficiency, but these comparisons are observational and could be  
25 affected by uncontrolled covariates.  
26

27 Direct comparisons within trials provide the only experimental evidence about the effects of co-  
28 supplementation with iron. For rare events like mortality, effects of zinc and iron can only be detected  
29 in large studies, so studies of interaction effects will need to be very large to detect real differences.  
30 Future studies are needed to identify main effects and to explore how administration (i.e. separate or  
31 combined) affects uptake and costs.  
32

33 Dietary intake and supplementation have reduced micronutrient deficiencies in Asia, but  
34 micronutrient deficiencies remain common.<sup>3,27</sup> The prevalence of micronutrient deficiencies is  
35 declining in Africa, but the absolute number of deficient children is increasing.<sup>3</sup> This review suggests  
36 that the overall benefits of preventive zinc supplementation outweigh potential harms in areas with a  
37 high risk of zinc deficiency. Further research is needed to determine if these benefits extend to  
38 children over 5 years of age. Current estimates suggest that delivering 10 evidence-based nutrition-  
39 specific interventions, including preventive zinc supplements, could reduce global mortality in  
40 children under 5 years of age by 15%.<sup>28</sup> To that end, research is needed to identify the most effective  
41 strategies for delivering zinc supplements to populations in need.<sup>29</sup>  
42  
43  
44  
45  
46  
47  
48  
49  
50  
51  
52  
53  
54  
55  
56  
57  
58  
59  
60



## Acknowledgements

We thank the Cochrane Developmental Psychosocial and Learning Problems Group, particularly: Margaret Anderson helped develop and conduct the searches; Laura MacDonald, Joanne Wilson, and Geraldine Macdonald assisted with the preparation of the protocol and review; Geraldine Macdonald provided detailed comments on the protocol and completed review. The Cochrane Methods Group provided statistical advice and assistance. Chris Champion extracted one study in Portuguese. Evelyn S Chan, Xin Hui Chan, Jai Das, and Aneil Jaswal extracted study data.

## Contributors

All authors contributed to the background. EMW and JJ were responsible for the methods. JJ executed the first literature search, and EMW and AI executed the update. JJ, EMW, AI, and EC reviewed citations for inclusion. JJ, EMW, AI, SD, XHC, and AJ extracted data. JJ and EMW entered outcome data into RevMan and analysed the data. EMW, JJ, and AI wrote the results and discussion. EMW and AI drafted the summary of findings table, which was agreed on by all authors. ZB contributed to the writing and interpretation of findings. EMW is the guarantor.

## Funding

No funding bodies had any role in study design, data collection and analysis, decision to publish, or preparation of the manuscript. We received internal support from the Department of Epidemiology, Johns Hopkins Bloomberg School of Public Health (US); Centre for Outcomes Research and Effectiveness (CORE), Research Department of Clinical, Educational & Health Psychology, University College London (UK); the Centre for Evidence Based Intervention, Department of Social Policy and Intervention, University of Oxford (UK); and the Division of Women and Child Health, Aga Khan University Hospital (PK).

## Competing interests

All authors have completed the ICMJE uniform disclosure form at [www.icmje.org/coi\\_disclosure.pdf](http://www.icmje.org/coi_disclosure.pdf) (available on request from the corresponding author) and declare: no support from any organisation for the submitted work; no financial relationships with any organisations that might have an interest in the submitted work in the previous three years. ZAB is an author of some of the included trials. ZAB and AI have published previous reviews about zinc.

## Ethical approval

Not required.

## Data sharing

Data are provided in the appendices and available from the authors upon request.

## APPENDICES

- Appendix 1: Electronic searches
- Appendix 2: Excluded studies
- Appendix 3: On-going studies
- Appendix 4: Included studies
- Appendix 5: Risk of bias
- Appendix 6: Subgroup analyses
- Appendix 7: Additional forest plots
- Appendix 8: Tests for reporting bias

1  
2  
3  
4  
5  
6  
7  
8  
9  
10  
11  
12  
13  
14  
15  
16  
17  
18  
19  
20  
21  
22  
23  
24  
25  
26  
27  
28  
29  
30  
31  
32  
33  
34  
35  
36  
37  
38  
39  
40  
41  
42  
43  
44  
45  
46  
47  
48  
49  
50  
51  
52  
53  
54  
55  
56  
57  
58  
59  
60

For peer review only

## REFERENCES

1. Hotz C BK. International Zinc Nutrition Consultative Group (IZiNCG). Assessment of the risk of zinc deficiency in populations and options for its control. *Food and Nutrition Bulletin*. 2004; **25**((1 Suppl 2)): S94-203.
2. Maggini S, Wenzlaff S, Hornig D. Essential role of vitamin C and zinc in child immunity and health. *The Journal of international medical research*. 2010; **38**(2): 386-414.
3. Black RE, Victora CG, Walker SP, Bhutta ZA, Christian P, de Onis M, et al. Maternal and child undernutrition and overweight in low-income and middle-income countries. *Lancet*. 2013; **382**(9890): 427-51.
4. Aggarwal R, Sentz J, Miller MA. Role of zinc administration in prevention of childhood diarrhea and respiratory illnesses: a meta-analysis. *Pediatrics*. 2007; **119**(6): 1120-30.
5. Brown KH PJ, Baker SK, Hess SY. Preventive zinc supplementation among infants, preschoolers, and older prepubertal children. *Food and Nutrition Bulletin*. 2009; **30**(1): S12-40.
6. Imdad A, Bhutta ZA. Effect of preventive zinc supplementation on linear growth in children under 5 years of age in developing countries: a meta-analysis of studies for input to the lives saved tool. *BMC Public Health*. 2011; **11 Suppl 3**: S22.
7. Patel A MM, Badhoniya N, Kulkarni H. What zinc supplementation does and does not achieve in diarrhea prevention: a systematic review and meta-analysis. *BMC Infectious Diseases* 2011; (11): 122.
8. Ramakrishnan U, Nguyen P, Martorell R. Effects of micronutrients on growth of children under 5 y of age: meta-analyses of single and multiple nutrient interventions. *American Journal of Clinical Nutrition*. 2009; **89**(1): 191-203.
9. Roth DE, Richard SA, Black RE. Zinc supplementation for the prevention of acute lower respiratory infection in children in developing countries: meta-analysis and meta-regression of randomized trials. *International Journal of Epidemiology*. 2010; **39**(3): 795-808.
10. Yakoob MY, Theodoratou E, Jabeen A, Imdad A, Eisele TP, Ferguson J, et al. Preventive zinc supplementation in developing countries: impact on mortality and morbidity due to diarrhea, pneumonia and malaria. (Special Issue: Technical inputs, enhancements and applications of the Lives Saved Tool (LiST)). *BMC Public Health*. 2011; **11**(Suppl. 3): S23.
11. Bhutta ZA, Black RE, Brown KH, Gardner JM, Gore S, Hidayat A, et al. Prevention of diarrhea and pneumonia by zinc supplementation in children in developing countries: pooled analysis of randomized controlled trials. Zinc Investigators' Collaborative Group. *Journal of Pediatrics*. 1999; **135**(6): 689-97.
12. Lassi ZS, Haider BA, Bhutta ZA. Zinc supplementation for the prevention of pneumonia in children aged 2 months to 59 months. *Cochrane Database of Systematic Reviews*. 2010; (12): CD005978.
13. Pasricha S-R, Hayes E, Kalumba K, Biggs B-A. Effect of daily iron supplementation on health in children aged 4–23 months: a systematic review and meta-analysis of randomised controlled trials. *The Lancet Global Health*. 2013; **1**(2): e77-86.
14. Junior JA, Dean S, Mayo-Wilson E, Imdad A, Bhutta ZA. Zinc supplementation for preventing mortality and morbidity, and promoting growth, in children aged 6 months to 12 years of age (Protocol). *Cochrane Database of Systematic Reviews*. 2011; **10**: Art. No.: CD009384. DOI: 10.1002/14651858.CD009384.
15. Higgins JP, Green S. *Cochrane Handbook for Systematic Reviews of Interventions*. Version 5.1.0 [updated March 2011]: The Cochrane Collaboration; 2011.
16. Balshem H, Helfand M, Schunemann HJ, Oxman AD, Kunz R, Brozek J, et al. GRADE guidelines: 3. Rating the quality of evidence. *Journal of Clinical Epidemiology*. 2011; **64**(4): 401-6.
17. Bhandari N, Taneja S, Mazumder S, Bahl R, Fontaine O, Bhan MK, et al. Adding zinc to supplemental iron and folic acid does not affect mortality and severe morbidity in young children. *Journal of Nutrition*. 2007; **137**(1): 112-7.
18. Sazawal S, Black RE, Ramsan M, Chwaya HM, Stoltzfus RJ, Dutta A, et al. Effects of routine prophylactic supplementation with iron and folic acid on admission to hospital and mortality in preschool children in a high malaria transmission setting: community-based,

- 1 randomised, placebo-controlled trial.[Erratum appears in Lancet. 2006 Jan  
2 28;367(9507):302]. Lancet. 2006; **367**(9505): 133-43.
- 3 19. Tielsch JM, Khattry SK, Stoltzfus RJ, Katz J, LeClerq SC, Adhikari R, et al. Effect of  
4 routine prophylactic supplementation with iron and folic acid on preschool child mortality in  
5 southern Nepal: community-based, cluster-randomised, placebo-controlled trial. Lancet.  
6 2006; **367**(9505): 144-52.
- 7 20. Sempertegui F, Estrella B, Correa E, Aguirre L, Saa B, Torres M, et al. Effects of  
8 short-term zinc supplementation on cellular immunity, respiratory symptoms, and growth of  
9 malnourished Equadorian children. European Journal of Clinical Nutrition. 1996; **50**(1): 42-  
10 6.
- 11 21. Alarcon K, Kolsteren PW, Prada AM, Chian AM, Velarde RE, Pecho IL, et al. Effects  
12 of separate delivery of zinc or zinc and vitamin A on hemoglobin response, growth, and  
13 diarrhea in young Peruvian children receiving iron therapy for anemia. American Journal of  
14 Clinical Nutrition. 2004; **80**(5): 1276-82.
- 15 22. Mazariegos M, Hambidge KM, Westcott JE, Solomons NW, Raboy V, Das A, et al.  
16 Neither a zinc supplement nor phytate-reduced maize nor their combination enhance growth  
17 of 6- to 12-month-old Guatemalan infants. Journal of Nutrition. 2010; **140**(5): 1041-8.
- 18 23. Duval S, Tweedie R. Trim and fill: A simple funnel-plot-based method of testing and  
19 adjusting for publication bias in meta-analysis. Biometrics. 2000; **56**(2): 455-63.
- 20 24. Wessells KR, Brown KH. Estimating the global prevalence of zinc deficiency: results  
21 based on zinc availability in national food supplies and the prevalence of stunting. PLoS  
22 ONE. 2012; **7**(11): e50568.
- 23 25. Maret W, Sandstead HH. Zinc requirements and the risks and benefits of zinc  
24 supplementation. J Trace Elem Med Biol. 2006; **20**(1): 3-18.
- 25 26. Sandstrom B. Micronutrient interactions: effects on absorption and bioavailability. The  
26 British journal of nutrition. 2001; **85 Suppl 2**: S181-5.
- 27 27. Ram U, Jha P, Ram F, Kumar K, Awasthi S, Shet A, et al. Neonatal, 1–59 month, and  
28 under-5 mortality in 597 Indian districts, 2001 to 2012: estimates from national demographic  
29 and mortality surveys. The Lancet Global Health. 2013; **Online first**.
- 30 28. Bhutta ZA, Das JK, Rizvi A, Gaffey MF, Walker N, Horton S, et al. Evidence-based  
31 interventions for improvement of maternal and child nutrition: what can be done and at what  
32 cost? Lancet. 2013; **382**(9890): 452-77.
- 33 29. Wazny K, Zipursky A, Black R, Curtis V, Duggan C, Guerrant R, et al. Setting  
34 research priorities to reduce mortality and morbidity of childhood diarrhoeal disease in the  
35 next 15 years. PLoS Medicine. 2013; **10**(5): e1001446.
- 36  
37  
38  
39  
40  
41  
42  
43  
44  
45  
46  
47  
48  
49  
50  
51  
52  
53  
54  
55  
56  
57  
58  
59  
60

## TABLES AND FIGURES

Figure 1: PRISMA flowchart

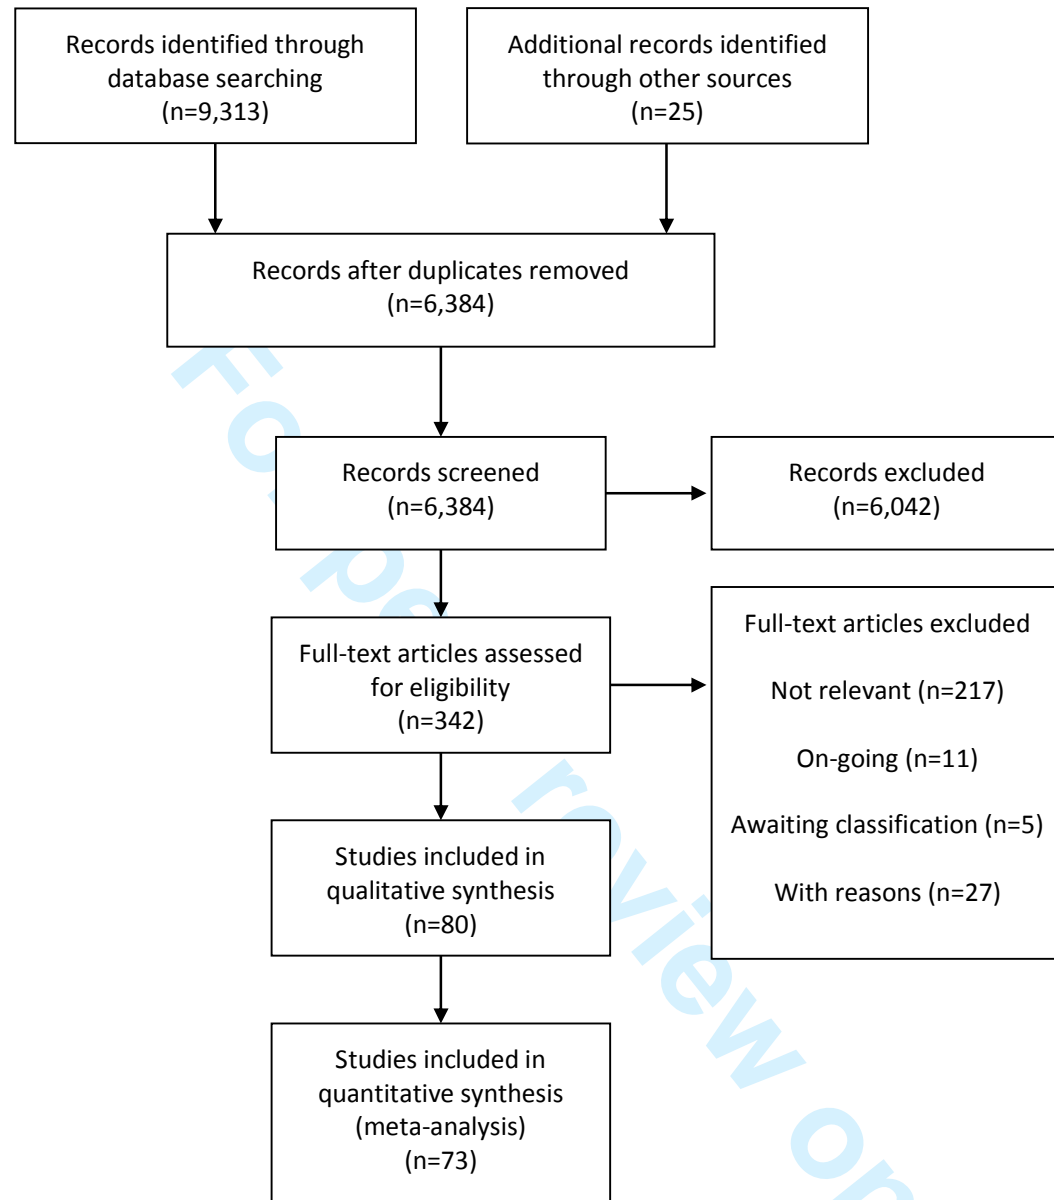

1  
2  
3  
4  
5  
6  
7  
8  
9  
10  
11  
12  
13  
14  
15  
16  
17  
18  
19  
20  
21  
22  
23  
24  
25  
26  
27  
28  
29  
30  
31  
32  
33  
34  
35  
36  
37  
38  
39  
40  
41  
42  
43  
44  
45  
46  
47  
48  
49  
50  
51  
52  
53  
54  
55  
56  
57  
58  
59  
60

**Figure 2: Risk of bias summary**

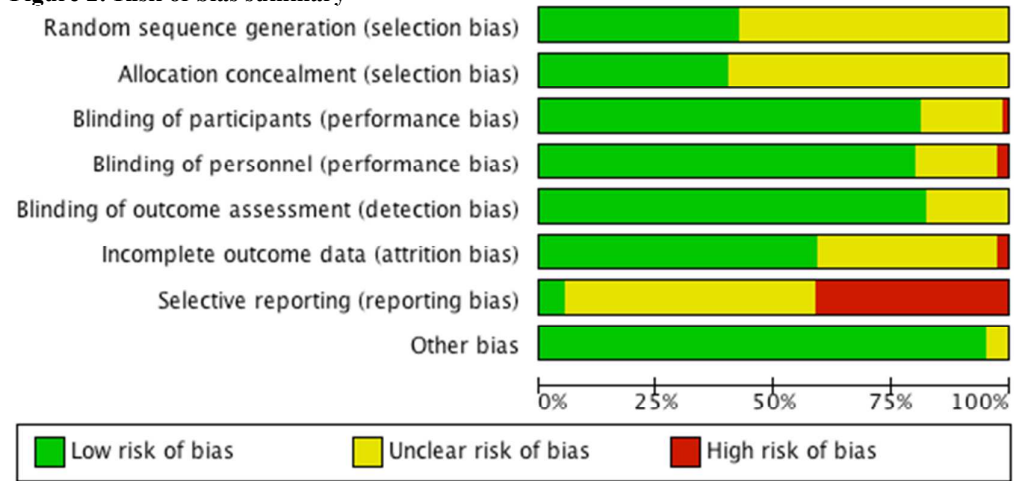

peer review only

Figure 3: All-cause mortality by age

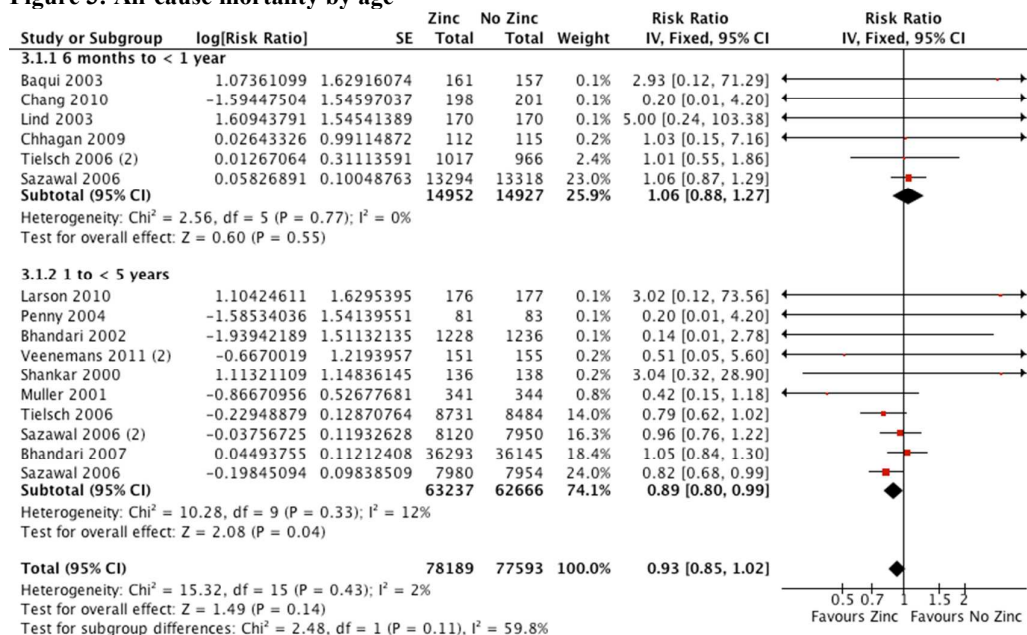

Figure 4: Incidence of all cause diarrhoea with and without iron co-supplementation

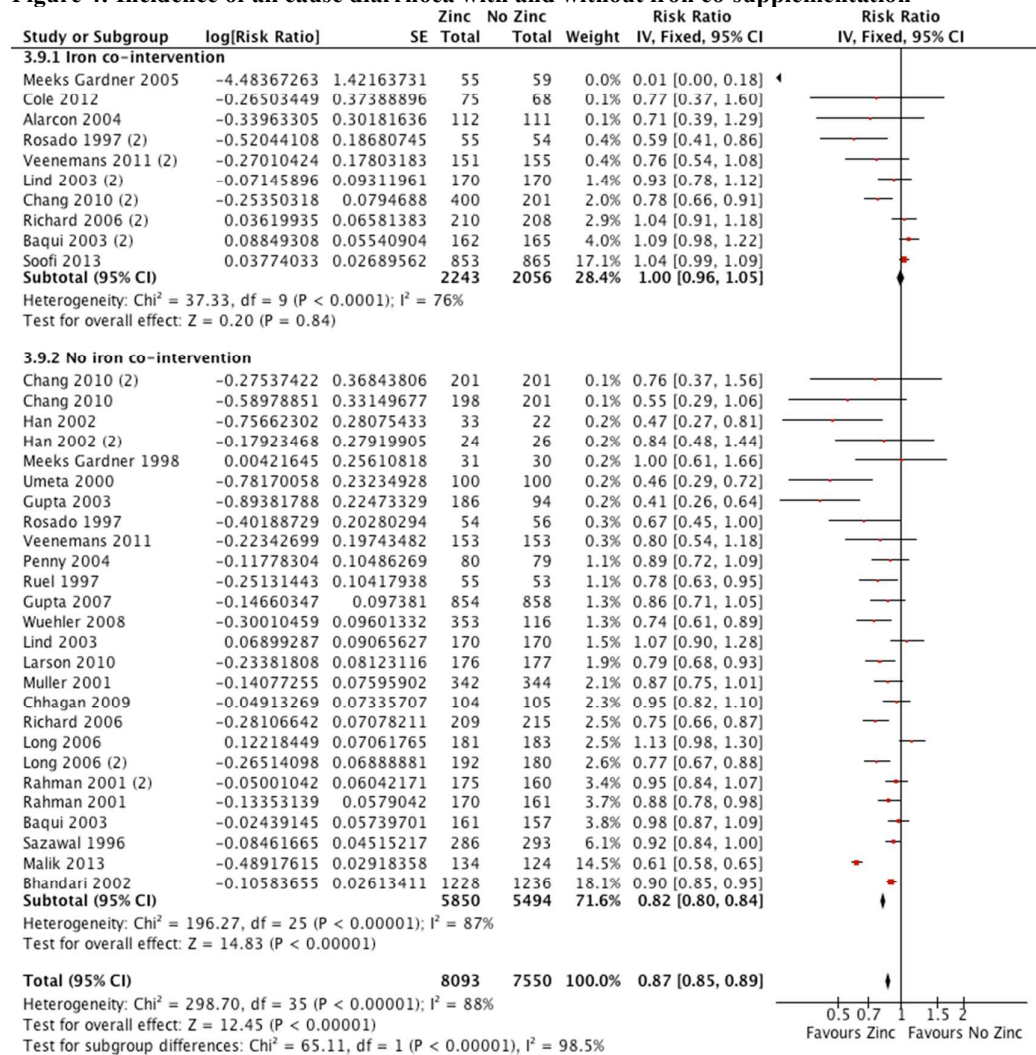



Figure 5: Height

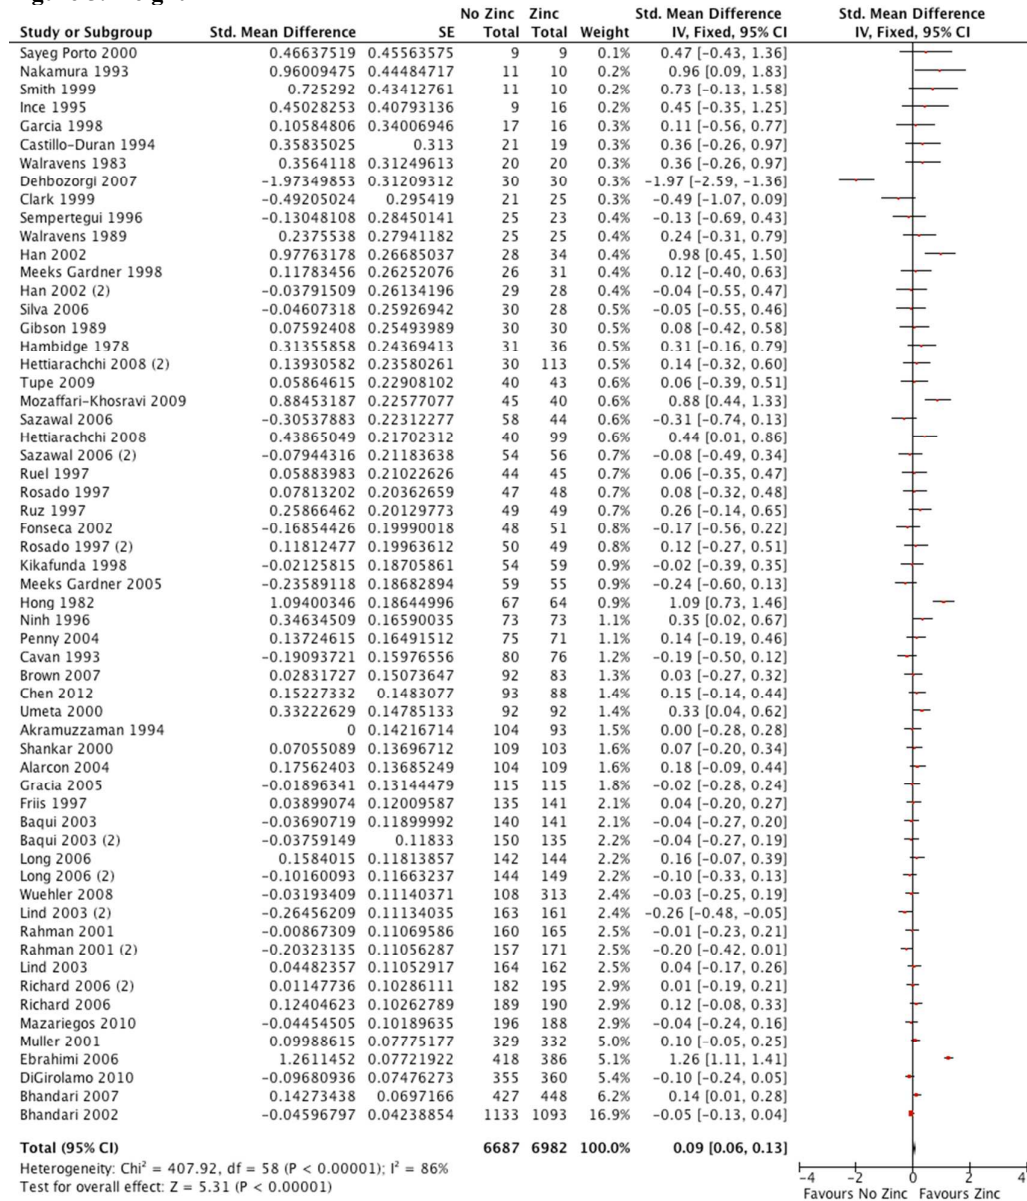

Figure 6: Incidence of diarrhoea funnel plot (trim-and-fill analysis)

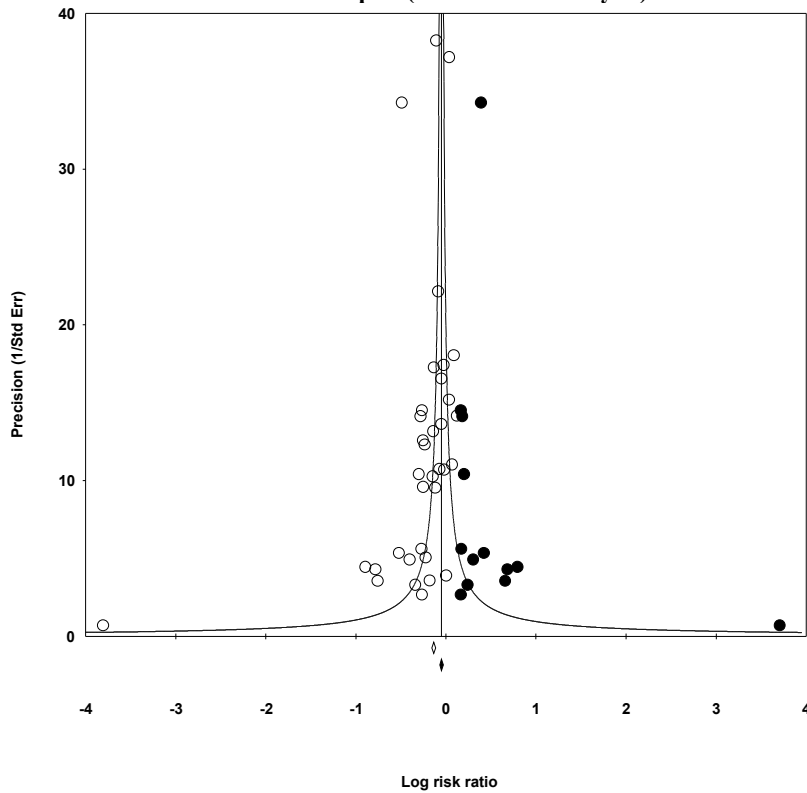

review only

1  
2  
3  
4  
5  
6  
7  
8  
9  
10  
11  
12  
13  
14  
15  
16  
17  
18  
19  
20  
21  
22  
23  
24  
25  
26  
27  
28  
29  
30  
31  
32  
33  
34  
35  
36  
37  
38  
39  
40  
41  
42  
43  
44  
45  
46  
47  
48  
49  
50  
51  
52  
53  
54  
55  
56  
57  
58  
59  
60

**Table 1: Summary of findings**

| Outcomes                                                          | Illustrative comparative risks* (95% CI)            |                                                                                       | Relative effect (95% CI)   | No of Participants (studies) | Quality of the evidence (GRADE) |
|-------------------------------------------------------------------|-----------------------------------------------------|---------------------------------------------------------------------------------------|----------------------------|------------------------------|---------------------------------|
|                                                                   | Assumed risk                                        | Corresponding risk                                                                    |                            |                              |                                 |
|                                                                   | Control                                             | Zinc                                                                                  |                            |                              |                                 |
| All-cause mortality<br>Follow-up: 17 to 72 weeks                  | Low<br>2,400 per 1,000,000                          | 2,280 per 1,000,000<br>(2,064 to 2,520)                                               | RR 0.95<br>(0.86 to 1.05)  | 138,302<br>(13 studies)      | ⊕⊕⊕⊕<br>high                    |
|                                                                   | High<br>34,900 per 1,000,000                        | 33,155 per 1,000,000<br>(30,014 to 36,645)                                            |                            |                              |                                 |
| Mortality due to all-cause diarrhoea<br>Follow-up: 52 to 69 weeks | Low<br>800 per 1,000,000                            | 760 per 1,000,000<br>(552 to 1,048)                                                   | RR .95<br>(0.69 to 1.31)   | 132,321<br>(4 studies)       | ⊕⊕⊕⊖<br>moderate <sup>1</sup>   |
|                                                                   | High<br>3,000 per 1,000,000                         | 2,850 per 1,000,000<br>(2,070 to 3,930)                                               |                            |                              |                                 |
| Mortality due to LRTI<br>Follow-up: 52 to 69 weeks                | Low<br>1,200 per 1,000,000                          | 1,032 per 1,000,000<br>(768 to 1,380)                                                 | RR 0.86<br>(0.64 to 1.15)  | 132,063<br>(3 studies)       | ⊕⊕⊕⊖<br>moderate <sup>1</sup>   |
|                                                                   | High<br>3,000 per 1,000,000                         | 2,580 per 1,000,000<br>(1,920 to 3,450)                                               |                            |                              |                                 |
| Mortality due to malaria<br>Follow-up: 46 to 69 weeks             | Low<br>7,400 per 1,000,000                          | 6,660 per 1,000,000<br>(5,698 to 7,844)                                               | RR 0.90<br>(0.77 to 1.06)  | 42,818<br>(2 study)          | ⊕⊕⊕⊖<br>moderate <sup>1</sup>   |
|                                                                   | High<br>14,200 per 1,000,000                        | 12,780 per 1,000,000<br>(10,934 to 15,052)                                            |                            |                              |                                 |
| Incidence of all-cause diarrhoea<br>Follow-up: 12 to 72 weeks     | Low<br>20,000 per 1,000,000                         | 17,400 per 1,000,000<br>(17,000 to 17,800)                                            | RR 0.87<br>(0.85 to 0.89)  | 15,042<br>(35 studies)       | ⊕⊕⊖⊖<br>low <sup>2,3</sup>      |
|                                                                   | High<br>1,770,000 per 1,000,000                     | 1,539,900 per 1,000,000<br>(1,504,500 to 1,575,300)                                   |                            |                              |                                 |
| Incidence of LRTI<br>Follow-up: 12 to 52 weeks                    | Low<br>30,000 per 1,000,000                         | 30,000 per 1,000,000<br>(28,200 to 32,100)                                            | RR 1.00<br>(0.94 to 1.07)  | 9,610<br>(12 studies)        | ⊕⊕⊕⊕<br>high                    |
|                                                                   | High<br>370,000 per 1,000,000                       | 370,000 per 1,000,000<br>(347,800 to 395,900)                                         |                            |                              |                                 |
| Incidence of malaria<br>Follow-up: 24 to 47 weeks                 | Low<br>140,000 per 1,000,000                        | 147,000 per 1,000,000<br>(133,000 to 161,000)                                         | RR 1.05<br>(0.95 to 1.15)  | 2,407<br>(4 studies)         | ⊕⊕⊕⊖<br>moderate <sup>4</sup>   |
|                                                                   | High<br>2,950,000 per 1,000,000                     | 3,097,500 per 1,000,000<br>(2,802,500 to 3,392,500)                                   |                            |                              |                                 |
| Height<br>Follow-up: 10 to 60 weeks                               | The mean height in the control groups was<br>-1 HAZ | The mean height in the intervention groups was<br>0.1 HAZ better<br>(0 to 0.2 better) | SMD 0.09<br>(0.06 to 0.13) | 13,669<br>(51 studies)       | ⊕⊕⊕⊖<br>moderate <sup>5</sup>   |
| Participants with 1 vomiting episode<br>Follow-up: 24 to 52 weeks | Low<br>17,500 per 1,000,000                         | 22,575 per 1,000,000<br>(19,950 to 25,550)                                            | RR 1.29<br>(1.14 to 1.46)  | 35,192<br>(4 studies)        | ⊕⊕⊕⊕<br>high                    |
|                                                                   | High<br>300,600 per 1,000,000                       | 387,774 per 1,000,000<br>(342,684 to 438,876)                                         |                            |                              |                                 |

\*The basis for the assumed risk (e.g. the median control group risk across studies) is provided in footnotes. The corresponding risk (and its 95% confidence interval) is based on the assumed risk in the comparison group and the relative effect of the intervention (and its 95% CI).

CI: Confidence interval; RR: Risk ratio; SMD: Standardised Mean Difference

---

GRADE Working Group grades of evidence

High quality: Further research is very unlikely to change our confidence in the estimate of effect.

Moderate quality: Further research is likely to have an important impact on our confidence in the estimate of effect and may change the estimate.

Low quality: Further research is very likely to have an important impact on our confidence in the estimate of effect and is likely to change the estimate.

Very low quality: We are very uncertain about the estimate.

Footnotes

<sup>1</sup> Few deaths observed overall.

<sup>2</sup>  $I^2=88\%$

<sup>3</sup> Trim and fill analysis suggests the effect may be overestimated due to publication bias.

<sup>4</sup>  $I^2=44\%$

<sup>5</sup>  $I^2=86\%$

For peer review only

Table 2: Zinc compared with no zinc (all outcomes)

| Outcomes                                 | Trials   | People       | ES (95% CI), fixed effects | Heterogeneity<br>I <sup>2</sup> ; Chi <sup>2</sup> (p value) |
|------------------------------------------|----------|--------------|----------------------------|--------------------------------------------------------------|
| <b>ZINC VERSUS NO ZINC</b>               |          |              |                            |                                                              |
| <b>Mortality</b>                         |          |              |                            |                                                              |
| All-cause                                | 13 (16%) | 138302 (67%) | Risk=0.95 (0.86 to 1.05)   | 0%; 10.57 (p=0.65)                                           |
| Due to diarrhoea                         | 4 (5%)   | 132321 (64%) | Risk=0.95 (0.69 to 1.31)   | 0%; 0.82 (p=0.84)                                            |
| Due to LRTI                              | 3 (4%)   | 132063 (64%) | Risk=0.86 (0.64 to 1.15)   | 0%; 0.07 (p=0.96)                                            |
| Due to malaria                           | 2 (3%)   | 42818 (21%)  | Risk=0.90 (0.77 to 1.06)   | 0%; 0.01 (p=0.94)                                            |
| <b>Hospitalisation</b>                   |          |              |                            |                                                              |
| All-cause                                | 7 (9%)   | 92872 (45%)  | Risk=1.04 (0.97 to 1.11)   | 44%; 14.41 (p=0.07)                                          |
| Due to diarrhoea                         | 4 (5%)   | 74039 (36%)  | Risk=1.03 (0.87 to 1.22)   | 42%; 6.91 (p=0.14)                                           |
| Due to LRTI                              | 3 (4%)   | 74743 (36%)  | Risk=1.10 (0.93 to 1.30)   | 0%; 0.35 (p=0.95)                                            |
| <b>Diarrhoea</b>                         |          |              |                            |                                                              |
| Incidence (all cause)                    | 35 (44%) | 15042 (7%)   | Risk=0.87 (0.85 to 0.89)   | 88%; 295.56 (p<0.00001)                                      |
| Prevalence (all cause)                   | 13 (16%) | 8519 (4%)    | Rate=0.88 (0.86 to 0.90)   | 88%; 118.88 (p<0.00001)                                      |
| Incidence (severe)                       | 5 (6%)   | 4982 (2%)    | Risk=0.89 (0.84 to 0.95)   | 56%; 13.54 (p=0.04)                                          |
| Incidence (persistent)                   | 7 (9%)   | 6216 (3%)    | Risk=0.73 (0.62 to 0.85)   | 61%; 20.47 (p=0.009)                                         |
| Prevalence (persistent)                  | 1 (1%)   | 666 (0%)     | Rate=0.70 (0.64 to 0.76)   | 91%; 11.76 (p=0.0006)                                        |
| <b>Lower respiratory tract infection</b> |          |              |                            |                                                              |
| Incidence                                | 12 (15%) | 9610 (5%)    | Risk=1.00 (0.94 to 1.07)   | 1%; 17.16 (p=0.44)                                           |
| Prevalence                               | 3 (4%)   | 1955 (1%)    | Rate=1.20 (1.10 to 1.30)   | 97%; 89.87 (p<0.00001)                                       |
| <b>Malaria</b>                           |          |              |                            |                                                              |
| Incidence                                | 4 (5%)   | 2407 (1%)    | Risk=1.05 (0.95 to 1.15)   | 0%; 2.04 (p=0.84)                                            |
| Prevalence                               | 1 (1%)   | 661 (0%)     | Rate=0.88 (0.47 to 1.64)   | Not applicable                                               |
| <b>Growth</b>                            |          |              |                            |                                                              |
| Height                                   | 51 (64%) | 13669 (7%)   | SMD=0.09 (0.06 to 0.13)    | 86%; 407.92 (p<0.00001)                                      |
| Weight                                   | 44 (55%) | 12305 (6%)   | SMD=0.10 (0.07 to 0.14)    | 76%; 216.64 (p<0.00001)                                      |
| Weight-to-height ratio                   | 24 (30%) | 7901 (4%)    | SMD=0.05 (0.01 to 0.10)    | 20%; 34.96 (p=0.17)                                          |
| Prevalence of stunting                   | 6 (8%)   | 3838 (2%)    | Risk=0.94 (0.86 to 1.02)   | 59%; 19.43 (p=0.01)                                          |
| <b>Adverse events</b>                    |          |              |                            |                                                              |
| Participants with 1 AE                   | 2 (3%)   | 850 (0%)     | SMD=1.13 (1.00 to 1.27)    | 0%; 0.49 (p=0.78)                                            |
| Study withdrawal                         | 6 (8%)   | 4263 (2%)    | Risk=1.75 (0.93 to 3.32)   | 21%; 5.07 (p=0.28)                                           |
| Vomiting (incidence)                     | 5 (6%)   | 4095 (2%)    | Risk=1.68 (1.61 to 1.75)   | 85%; 34.28 (p<0.00001)                                       |
| Vomiting (prevalence)                    | 4 (5%)   | 35192 (17%)  | Rate=1.29 (1.14 to 1.46)   | 37%; 6.31 (p=0.18)                                           |
| <b>Biological indicators</b>             |          |              |                            |                                                              |
| Zn concentration                         | 46 (58%) | 9810 (5%)    | SMD=0.62 (0.58 to 0.67)    | 91%; 582.45 (p<0.00001)                                      |
| Zn deficiency (prevalence)               | 15 (19%) | 5434 (3%)    | Risk=0.49 (0.45 to 0.53)   | 86%; 144.77 (p<0.00001)                                      |
| Haemoglobin concentration                | 27 (34%) | 6024 (3%)    | SMD=-0.05 (-0.10 to 0.00)  | 45%; 63.96 (p=0.002)                                         |
| Anemia (prevalence)                      | 13 (16%) | 4287 (2%)    | Risk=1.00 (0.95 to 1.06)   | 37%; 28.52 (p=0.05)                                          |
| Fe concentration                         | 19 (24%) | 4474 (2%)    | SMD=0.07 (0.00 to 0.13)    | 95%; 480.50 (p<0.00001)                                      |
| Fe deficiency (prevalence)               | 10 (13%) | 3149 (2%)    | Risk=0.99 (0.89 to 1.10)   | 15%; 16.44 (p=0.29)                                          |
| Cu concentration                         | 11 (14%) | 3071 (1%)    | SMD=-0.22 (-0.29 to 0.14)  | 68%; 37.47 (p=0.0002)                                        |
| Cu deficiency (prevalence)               | 3 (4%)   | 1337 (1%)    | Risk=2.64 (1.28 to 5.42)   | 59%; 4.94 (p=0.08)                                           |

**Table 3: Zinc with iron compared with zinc alone (all outcomes)**

| Outcomes                                 | Trials   | People     | ES (95% CI), fixed effects | Heterogeneity<br>I <sup>2</sup> ; Chi <sup>2</sup> (p value) |
|------------------------------------------|----------|------------|----------------------------|--------------------------------------------------------------|
| <b>All cause mortality</b>               | 1 (13%)  | 323 (17%)  | Risk=0.33 (0.01 to 8.31)   | Not applicable                                               |
| <b>Hospitalisation</b>                   |          |            |                            |                                                              |
| All-cause                                | 1 (13%)  | 399 (21%)  | Risk=0.92 (0.45 to 1.89)   | Not applicable                                               |
| Due to diarrhoea                         | 1 (13%)  | 399 (21%)  | Risk=0.99 (0.25 to 3.88)   | Not applicable                                               |
| <b>Diarrhoea</b>                         |          |            |                            |                                                              |
| Incidence (all cause)                    | 5 (63%)  | 1530 (81%) | Risk=1.10 (1.03 to 1.18)   | 76%; 16.92 (p=0.002)                                         |
| Prevalence (all cause)                   | 1 (13%)  | 399 (21%)  | Rate=0.90 (0.79 to 1.06)   | Not applicable                                               |
| Incidence (severe)                       | 1 (13%)  | 323 (17%)  | Rate=0.78 (0.59 to 1.04)   | Not applicable                                               |
| <b>Lower respiratory tract infection</b> |          |            |                            |                                                              |
| Incidence                                | 3 (38%)  | 1065 (56%) | Risk=0.93 (0.83 to 1.04)   | 21%; 2.52 (p=0.28)                                           |
| <b>Malaria</b>                           |          |            |                            |                                                              |
| Incidence                                | 1 (13%)  | 410 (22%)  | Rate=0.86 (0.59 to 1.24)   | Not applicable                                               |
| <b>Growth</b>                            |          |            |                            |                                                              |
| Height                                   | 5 (63%)  | 1517 (80%) | SMD=0.06 (-0.04 to 0.16)   | 0%; 3.54 (p=0.47)                                            |
| Weight                                   | 4 (50%)  | 910 (48%)  | SMD=0.12 (-0.01 to 0.25)   | 0%; 2.29 (p=0.51)                                            |
| Weight-to-height ratio                   | 4 (50%)  | 514 (27%)  | SMD=-0.06 (-0.07 to 0.19)  | 0%; 1.36 (p=0.71)                                            |
| Prevalence of stunting                   | 2 (25%)  | 462 (24%)  | Risk=0.92 (0.85 to 0.99)   | 45%; 1.82 (p=0.18)                                           |
| <b>Adverse events</b>                    |          |            |                            |                                                              |
| Study withdrawal                         | 2 (25%)  | 557 (29%)  | Risk=1.41 (0.91 to 2.18)   | 0%; 0.08 (p=0.78)                                            |
| <b>Biological indicators</b>             |          |            |                            |                                                              |
| Zn concentration                         | 8 (100%) | 1337 (70%) | SMD=0.16 (0.05 to 0.27)    | 61%; 17.84 (p=0.01)                                          |
| Zn deficiency (prevalence)               | 3 (38%)  | 350 (18%)  | Risk =1.42 (0.75 to 2.68)  | 5%; 2.10 (p=0.35)                                            |
| Haemoglobin concentration                | 8 (100%) | 1341 (71%) | SMD=-0.23 (-0.34 to -0.12) | 79%; 33.53 (p<0.0001)                                        |
| Anemia (prevalence)                      | 3 (38%)  | 482 (25%)  | Risk=0.78 (0.67 to 0.92)   | 0%; 1.25 (p=0.54)                                            |
| Fe concentration                         | 6 (75%)  | 945 (50%)  | SMD=-1.79 (-1.99 to -1.56) | 99%; 927.92 (p<0.00001)                                      |
| Fe deficiency (prevalence)               | 2 (25%)  | 248 (13%)  | Risk =0.12 (0.04 to 0.32)  | 87%; 8.00 (p=0.005)                                          |
| Cu concentration                         | 2 (25%)  | 353 (19%)  | SMD=-0.06 (-0.27 to 0.15)  | 0%; 0.11 (p=0.74)                                            |

Rate ratio (Rate); Risk ratio (Risk); Odds Ratio (Odds); Standardised Mean Difference (SMD)

Zinc (Zn); Iron (Fe); Copper (Cu).

Effects favour intervention (i.e. zinc rather than iron; zinc plus iron rather than zinc alone) when the relative risk is reduced (RR<1) or the standardised difference is positive (SMD>0).

Table 4: Subgroup analyses

| Subgroup                                                                                 | Trials    | People        | Risk Ratio (95% CI), fixed | I <sup>2</sup> ; Chi <sup>2</sup> (p value) |
|------------------------------------------------------------------------------------------|-----------|---------------|----------------------------|---------------------------------------------|
| <b>Mortality</b>                                                                         | <b>13</b> | <b>138302</b> | <b>0.95 (0.86 to 1.05)</b> | <b>0%; 10.57 (p=0.65)</b>                   |
| <i>Iron co-supplementation</i> (I <sup>2</sup> =23%; Chi <sup>2</sup> =1.30, p=0.25)     |           |               |                            |                                             |
| with iron                                                                                | 4         | 99242         | 0.99 (0.86 to 1.15)        | 0%; 0.76 (p=0.86)                           |
| without iron                                                                             | 11        | 64985         | 0.89 (0.79 to 1.00)        | 0%; 9.99 (p=0.44)                           |
| <i>Age</i> (I <sup>2</sup> =59.8%; Chi <sup>2</sup> =2.48, p=0.11)                       |           |               |                            |                                             |
| 6m to 1y                                                                                 | 6         | 29879         | 1.06 (0.88 to 1.27)        | 0%; 2.56 (p=0.77)                           |
| 1y to 5y                                                                                 | 8         | 125903        | 0.89 (0.80 to 0.99)        | 12%; 10.28 (p=0.33)                         |
| <i>Dose</i> (I <sup>2</sup> =0%; Chi <sup>2</sup> =2.64, p=0.45)                         |           |               |                            |                                             |
| 0mg to 5mg                                                                               | 2         | 717           | 0.72 (0.08 to 6.47)        | 29%; 1.41 (p=0.23)                          |
| 5mg to 10mg                                                                              | 1         | 274           | 3.04 (0.32 to 28.90)       | Not applicable                              |
| 10mg to 15mg                                                                             | 11        | 152062        | 0.93 (0.84 to 1.02)        | 0%; 8.16 (p=0.61)                           |
| 20mg or more                                                                             | 1         | 2464          | 0.14 (0.01 to 2.78)        | Not applicable                              |
| <i>Duration</i> (I <sup>2</sup> =0%; Chi <sup>2</sup> =1.20, p=0.55)                     |           |               |                            |                                             |
| 0m to 6m                                                                                 | 2         | 2817          | 0.59 (0.07 to 5.15)        | 47%; 1.88 (p=0.17)                          |
| 6m to 12m                                                                                | 7         | 3898          | 0.68 (0.37 to 1.25)        | 4%; 6.23 (p=0.40)                           |
| 12m or more                                                                              | 6         | 148802        | 0.93 (0.85 to 1.03)        | 0%; 2.91 (p=0.71)                           |
| <i>Formulation</i> (I <sup>2</sup> =0%; Chi <sup>2</sup> =0.54, p=0.91)                  |           |               |                            |                                             |
| Solution                                                                                 | 5         | 3639          | 0.99 (0.25 to 3.91)        | 15%; 4.68 (p=0.32)                          |
| Pill/ tablet                                                                             | 8         | 149854        | 0.93 (0.85 to 1.02)        | 0%; 6.99 (p=0.43)                           |
| Capsule                                                                                  | 1         | 306           | 0.51 (0.05 to 5.60)        | Not applicable                              |
| Powder                                                                                   | 1         | 1718          | 0.71 (0.27 to 1.86)        | Not applicable                              |
| <b>Incidence of diarrhoea</b>                                                            | <b>35</b> | <b>15042</b>  | <b>0.87 (0.85 to 0.89)</b> | <b>88%; 295.56 (p&lt;0.00001)</b>           |
| <i>Iron co-supplementation</i> (I <sup>2</sup> =99%; Chi <sup>2</sup> =65.11, p<0.00001) |           |               |                            |                                             |
| with iron                                                                                | 10        | 4299          | 1.00 (0.96 to 1.05)        | 76%; 37.33 (p<0.00001)                      |
| without iron                                                                             | 22        | 11344         | 0.82 (0.80 to 0.84)        | 87%; 196.27 (p<0.00001)                     |
| <i>Age</i> (I <sup>2</sup> =0%; Chi <sup>2</sup> =0.32, p=0.85)                          |           |               |                            |                                             |
| 6m to 1y                                                                                 | 10        | 5576          | 0.88 (0.85 to 0.90)        | 95%; 252.46 (p<0.00001)                     |
| 1y to 5y                                                                                 | 15        | 8370          | 0.87 (0.84 to 0.90)        | 43%; 31.48 (p=0.03)                         |
| 5y to 13y                                                                                | 1         | 842           | 0.90 (0.81 to 0.98)        | Not applicable                              |
| <i>Dose</i> (I <sup>2</sup> =98%; Chi <sup>2</sup> =195.69, p<0.00001)                   |           |               |                            |                                             |
| 0mg to 5mg                                                                               | 4         | 1784          | 0.95 (0.89 to 1.01)        | 73%; 22.46 (p=0.001)                        |
| 5mg to 10mg                                                                              | 6         | 2630          | 0.73 (0.64 to 0.83)        | 67%; 15.32 (p=0.009)                        |
| 10mg to 15mg                                                                             | 11        | 5452          | 0.96 (0.92 to 0.99)        | 69%; 38.39 (p=0.0001)                       |
| 15mg to 20mg                                                                             | 2         | 477           | 0.61 (0.58 to 0.65)        | 0%; 0.21 (p<0.00001)                        |
| 20mg or more                                                                             | 6         | 4931          | 0.90 (0.87 to 0.94)        | 75%; 28.17 (p<0.00001)                      |
| <i>Duration</i> (I <sup>2</sup> =0%; Chi <sup>2</sup> =1.15, p=0.56)                     |           |               |                            |                                             |
| 0m to 6m                                                                                 | 7         | 4190          | 0.89 (0.85 to 0.93)        | 57%; 16.42 (p=0.02)                         |
| 6m to 12m                                                                                | 14        | 8971          | 0.86 (0.84 to 0.89)        | 93%; 250.92 (p<0.00001)                     |
| 12m or more                                                                              | 5         | 1881          | 0.88 (0.82 to 0.95)        | 73%; 29.82 (p=0.0002)                       |
| <i>Formulation</i> (I <sup>2</sup> =94%; Chi <sup>2</sup> =51.34, p<0.00001)             |           |               |                            |                                             |
| Solution                                                                                 | 19        | 10768         | 0.84 (0.82 to 0.86)        | 90%; 236.48 (p<0.00001)                     |
| Pill/ tablet                                                                             | 3         | 1696          | 0.90 (0.81 to 0.99)        | 5%; 3.15 (p=0.37)                           |
| Capsule                                                                                  | 1         | 612           | 0.78 (0.60 to 1.01)        | Not applicable                              |
| Powder                                                                                   | 2         | 1861          | 1.04 (0.98 to 1.09)        | 0%; 0.65 (p=0.42)                           |

**Appendix 1: Electronic searches****MEDLINE**

1 zinc/ or zinc compounds/ or zinc oxide/ or zinc sulfate/ or zinc acetate/  
 2 (zinc or Zn).tw.  
 3 1 or 2  
 4 exp infant/ or exp child/ or adolescent/  
 5 (newborn\$ or neonat\$ or neo-nat\$ or infan\$ or baby or babies or toddler\$ or preschool\$ or pre-  
 6 school\$ or pediatric\$ or paediatric\$ or child\$ or girl\$ or boy\$ or preteen\$ or pre-teen\$ or teen\$ or  
 7 preadolescenc\$ or pre-adolescenc\$ or adolescenc\$ or prepubert\$ or pre-pubert\$ or pubert\$).tw.  
 8 6 4 or 5  
 9 7 randomized controlled trial.pt.  
 10 8 controlled clinical trial.pt.  
 11 9 randomized.ab.  
 12 10 placebo.ab.  
 13 11 drug therapy.fs.  
 14 12 randomly.ab.  
 15 13 trial.ab.  
 16 14 groups.ab.  
 17 15 7 or 8 or 9 or 10 or 11 or 12 or 13 or 14  
 18 16 exp animals/ not humans.sh.  
 19 17 15 not 16  
 20 18 3 and 6 and 17

**Cochrane Central Register of Controlled Trials (CENTRAL)**

1 MeSH descriptor Zinc explode all trees  
 2 MeSH descriptor Zinc Compounds explode all trees  
 3 MeSH descriptor Zinc Oxide explode all trees  
 4 MeSH descriptor Zinc Sulfate explode all trees  
 5 MeSH descriptor Zinc Acetate explode all trees  
 6 (zinc):ti,ab,kw  
 7 (Zn):ti,ab,kw  
 8 (#1 OR #2 OR #3 OR #4 OR #5 OR #6 OR #7)  
 9 MeSH descriptor Infant explode all trees  
 10 MeSH descriptor Child explode all trees  
 11 MeSH descriptor Adolescent explode all trees  
 12 (newborn\* or neonat\* or (neo next nat\*) or infan\* or baby\* or babies or toddler\* or preschool\* or  
 13 (pre next school\*) or pediatric\* or paediatric\* or child\* or girl\* or boy\* or preteen\* or (pre next  
 14 teen\*) or teen\* or preadolescenc\* or (pre next adolescenc\*) or adolescenc\* or prepubert\* or (pre next  
 15 pubert\*) or pubert\*):ti,ab,kw  
 16 13 (#9 OR #10 OR #11 OR #12)  
 17 14 (#8 AND #13)

**MEDLINE In-Process & Other Non-Indexed Citations**

1 (zinc or Zn).tw.  
 2 (newborn\$ or neonat\$ or neo-nat\$ or infan\$ or baby or babies or toddler\$ or preschool\$ or pre-  
 3 school\$ or pediatric\$ or paediatric\$ or child\$ or girl\$ or boy\$ or preteen\$ or pre-teen\$ or teen\$ or  
 4 preadolescenc\$ or pre-adolescenc\$ or adolescenc\$ or prepubert\$ or pre-pubert\$ or pubert\$).tw.  
 5 3 randomized controlled trial.pt.  
 6 4 controlled clinical trial.pt.  
 7 5 randomized.ab.  
 8 6 placebo.ab.  
 9 7 drug therapy.fs.  
 10 8 randomly.ab.  
 11 9 trial.ab.  
 12 10 groups.ab.  
 13 11 3 or 4 or 5 or 6 or 7 or 8 or 9 or 10  
 14 12 exp animals/ not humans.sh.  
 15 13 11 not 12  
 16 14 1 and 2 and 13

**EMBASE**

1 zinc/ or zinc derivative/ or zinc oxide/ or zinc sulfate/ or zinc acetate/  
 2 (zinc or Zn).tw.



3 1 or 2  
 4 exp infant/ or exp child/ or exp adolescent/  
 5 (newborn\$ or neonat\$ or neo-nat\$ or infan\$ or baby or babies or toddler\$ or preschool\$ or pre-  
 6 school\$ or pediatric\$ or paediatric\$ or child\$ or girl\$ or boy\$ or preteen\$ or pre-teen\$ or teen\$ or  
 7 preadolescenc\$ or pre-adolescenc\$ or adolescenc\$ or prepubert\$ or pre-pubert\$ or pubert\$).tw.  
 8 6 4 or 5  
 9 7 exp crossover-procedure/ or exp double-blind procedure/ or exp randomized controlled trial/ or exp  
 10 single-blind procedure/  
 11 8 (random\$ or factorial\$ or crossover\$ or cross-over\$ or placebo\$ or (doubl\$ adj blind\$) or (singl\$ adj  
 12 blind\$) or assign\$ or allocat\$ or volunteer\$).tw.  
 13 9 7 or 8  
 14 10 3 and 6 and 9  
 The terms in lines seven through eight are the same as those used by the UK Cochrane Centre to  
 identify randomised controlled trials.

#### African Index Medicus

zinc or Zn [Key Word] or zinc or Zn [Title] or zinc or Zn [Descriptor]

#### Global Health

1 zinc/ or zinc sulfate/ or zinc oxide/  
 2 (zinc or Zn).tw.  
 3 1 or 2  
 4 exp infants/ or exp children/ or exp adolescents/  
 5 (newborn\$ or neonat\$ or neo-nat\$ or infan\$ or baby or babies or toddler\$ or preschool\$ or pre-  
 6 school\$ or pediatric\$ or paediatric\$ or child\$ or girl\$ or boy\$ or preteen\$ or pre-teen\$ or teen\$ or  
 7 preadolescenc\$ or pre-adolescenc\$ or adolescenc\$ or prepubert\$ or pre-pubert\$ or pubert\$).tw.  
 8 6 4 or 5  
 9 7 (random\$ or control\$ or clinic\$ or trial\$ or placebo\$ or drug therap\$ or group\$ or crossover\$ or  
 10 cross-over\$ or double\$-blind\$ or single\$-blind\$ or factorial\$ or assign\$ or allocat\$ or volunteer\$).af.  
 11 8 3 and 6 and 7

#### IndMED

zinc or Zn [Title] OR zinc or Zn [Keywords]

#### Latin American Caribbean Health Sciences Literature (LILACS)

(MH Infant OR MH Child OR MH Adolescent) OR (Tw newborn\$ OR Tw neonat\$ OR Tw neo-nat\$  
 OR Tw infan\$ OR Tw baby\$ OR Tw babies OR Tw toddler\$ OR Tw preschool\$ OR Tw pre-school\$  
 OR Tw pediatric\$ OR Tw paediatric\$ OR Tw child\$ OR Tw girl\$ OR Tw boy\$ OR Tw preteen\$ OR  
 Tw pre-teen\$ OR Tw teen\$ OR Tw preadolescenc\$ OR Tw pre-adolescenc\$ OR Tw adolescenc\$ OR Tw  
 prepubert\$ OR Tw pre-pubert\$ OR Tw pubert\$ OR Tw niño\$ OR Tw niña\$ OR Tw bebé\$ OR Tw  
 preescolar\$ OR Tw prescolar\$ OR Tw pre-escolar\$ OR Tw pre-scolar\$) [Words] and (MH Zinc OR  
 MH Zinc Acetate OR MH Zinc Sulfate OR MH Zinc Compounds OR MH Zinc Oxide) OR Tw Zinc  
 OR Tw Zn [Words]

#### WHO Library & Information Networks for Knowledge Database (WHOLIS)

zinc or Zn [All indexes] [All sources]

#### metaRegister of Controlled Trials

(Zinc or Zn) AND (infant or infants or baby or babies or toddler or toddlers or pre-school or preschool  
 or pediatric or paediatric or child or children or girl or girls or boy or boys or pre-teen or pre-  
 adolescent or adolescent or pre-pubertal)

#### WHO International Clinical Trials Registry Platform (ICTRP)

zinc or Zn [in the Intervention]

#### Conference Proceedings Citation Index (formerly known as ISI Proceedings)

TS=(zinc or Zn) AND TS=(newborn\* or neonat\* or neo-nat\* or (neo nat\*) or infan\* or baby or babies  
 or toddler\* or preschool\* or pre-school\* or (pre school\*) or pediatric\* or paediatric\* or child\* or girl\*  
 or boy\* or preteen\* or pre-teen\* or (pre teen\*) or teen\* or preadolescenc\* or pre-adolescenc\* or (pre  
 adolescenc\*) or adolescenc\* or prepubert\* or pre-pubert\* or (pre pubert\*) or pubert\*) AND  
 TS=(random\* or control\* or clinic\* or trial\* or placebo\* or (drug therap\*) or group\* or crossover\* or  
 cross-over\* or (cross over\*) or double\*-blind\* or (double\* blind\*) or single\*-blind\* or (single\*  
 blind\*) or factorial\* or assign\* or allocat\* or volunteer\*)

1  
2  
3  
4  
5  
6  
7  
8  
9  
10  
11  
12  
13  
14  
15  
16  
17  
18  
19  
20  
21  
22  
23  
24  
25  
26  
27  
28  
29  
30  
31  
32  
33  
34  
35  
36  
37  
38  
39  
40  
41  
42  
43  
44  
45  
46  
47  
48  
49  
50  
51  
52  
53  
54  
55  
56  
57  
58  
59  
60

ProQuest Dissertations & Theses Database  
(zinc or Zn) AND (newborn\* or neonat\* or neo-nat\* or infan\* or baby or babies or toddler\* or preschool\* or pre-school\* or pediatric\* or paediatric\* or child\* or girl\* or boy\* or preteen\* or pre-teen\* or teen\* or preadolescen\* or pre-adolescenc\* or adolescen\* or prepubert\* or pre-pubert\* or pubert\*)

For peer review only

**Appendix 2: Excluded studies**

| <b>Study</b>                      | <b>Reason for exclusion</b>                                |
|-----------------------------------|------------------------------------------------------------|
| Ahmed 2009 <sup>1</sup>           | Non-RCT                                                    |
| Bates 1993 <sup>2</sup>           | Non-RCT                                                    |
| Behrens 1990 <sup>3</sup>         | Therapeutic supplementation                                |
| Berger 2006 <sup>4,6</sup>        | Ineligible age                                             |
| Brooks 2005 <sup>7</sup>          | Ineligible age                                             |
| Campos 2004 <sup>8</sup>          | Non-RCT                                                    |
| Cuevas 2002 <sup>9</sup>          | No eligible comparison                                     |
| Duggan 2003 <sup>10</sup>         | Fortification                                              |
| Fahmida 2007 <sup>11</sup>        | Ineligible age                                             |
| Hashemipour 2009 <sup>12-14</sup> | Children were obese                                        |
| Heinig 2006 <sup>15,16</sup>      | Ineligible age                                             |
| Hess 2011 <sup>17</sup>           | Acceptability study randomizing order of administration    |
| Imamoglu 2005 <sup>18</sup>       | Non-RCT                                                    |
| Kordas 2005 <sup>19-21</sup>      | Therapeutic supplementation                                |
| NCT01472211 <sup>22</sup>         | Intervention not eligible (LifeStraw with or without zinc) |
| Osendarp 2002 <sup>23</sup>       | Ineligible age                                             |
| Payne-Robinson 1991 <sup>24</sup> | Severe protein-energy malnutrition                         |
| Perrone 1999 <sup>25</sup>        | No eligible comparison                                     |
| Ronaghy 1969 <sup>26</sup>        | Ineligible age                                             |
| Ronaghy 1974 <sup>27</sup>        | Ineligible age                                             |
| Roxas 1980 <sup>28</sup>          | Non-RCT                                                    |
| Shingwekar 1979 <sup>29</sup>     | Non-RCT                                                    |
| Shrivastava 1993 <sup>30</sup>    | Non-RCT                                                    |
| Walravens 1992 <sup>31</sup>      | Ineligible age                                             |
| Wasantwisut 2006 <sup>32</sup>    | Ineligible age                                             |
| Yanfeng 1997 <sup>33</sup>        | No eligible comparison                                     |
| Zeba 2008 <sup>34</sup>           | No eligible comparison                                     |

**Appendix 3: On-going studies**

| <b>Study</b>                       | <b>Reason for exclusion</b> |
|------------------------------------|-----------------------------|
| Arabaci 2010 <sup>35</sup>         | Awaiting classification     |
| Chicourel 2001 <sup>36</sup>       | Awaiting classification     |
| CTRI/2010/091/001417 <sup>37</sup> | On-going                    |
| Jimenez 2000 <sup>38</sup>         | Awaiting classification     |
| Mitter 2009 <sup>39</sup>          | Awaiting classification     |
| NCT00133406 <sup>40</sup>          | On-going                    |
| NCT00228254 <sup>41</sup>          | On-going                    |
| NCT00374023 <sup>42</sup>          | On-going                    |
| NCT00421668 <sup>43</sup>          | On-going                    |
| NCT00589264 <sup>44</sup>          | On-going                    |
| NCT00944359 <sup>45</sup>          | On-going                    |
| NCT00967551 <sup>46</sup>          | On-going                    |
| NCT00980421 <sup>47</sup>          | On-going                    |
| NCT01306097 <sup>48</sup>          | On-going                    |
| NCT01616693 <sup>49</sup>          | On-going                    |
| Smith 1985 <sup>50</sup>           | Awaiting classification     |

## Appendix 4: Included studies

| Study                              | Country | N      | Age        | Dose                                 | Duration | Form     | Height                             | Co-intervention     |
|------------------------------------|---------|--------|------------|--------------------------------------|----------|----------|------------------------------------|---------------------|
| Ahmed 2009 <sup>51</sup>           | BD      | 40     | 10 to 18   | 20mg daily                           | 1.5      | Solution | Not reported                       | Cholera vaccine     |
| Akramuazzaman 1994 <sup>52</sup>   | BD      | 256    | mean=35    | 20mg daily                           | 15       | Solution | Stunted and non-stunted            | Vitamins A, C, D    |
| Alarcon 2004 <sup>53</sup>         | PE      | 223    | 6 to 35    | 3mg/kg 6d/wk                         | 4.5      | Solution | HAZ=-1.04                          | Iron                |
| Albert 2003 <sup>54, 55</sup>      | BD      | 256    | 24 to 60   | 20mg daily                           | 1.5      | Solution | Not reported                       | Cholera vaccine     |
| Ba Lo 2011 <sup>56</sup>           | SN      | 97     | 9 to 17    | 6mg daily                            | 0.5      | Solution | Non-stunted only; HAZ=-0.44        | Micronutrients      |
| Baqui 2003 <sup>57-60</sup>        | BD      | 645    | 6 to 6     | 20mg weekly                          | 6        | Solution | Stunted and non-stunted; HAZ=-1.2  | Vitamin B           |
| Bhandari 2002 <sup>61-67</sup>     | IN      | 2482   | 6 to 30    | 10mg <1y; 20mg >1y daily             | 4        | Solution | Stunted and non-stunted; HAZ=-1.82 | Vitamin A           |
| Bhandari 2007 <sup>68, 69</sup>    | IN      | 72,438 | 6 to 23    | 10mg daily                           | 12       | Tablet   | Stunted and non-stunted; HAZ=-1.95 | Iron and folic acid |
| Brown 2007 <sup>70-73</sup>        | PE      | 200    | 6 to 8     | 3mg daily                            | 6        | Solution | Stunted and non-stunted; HAZ=-1.19 | Micronutrients      |
| Castillo-Duran 1994 <sup>74</sup>  | CL      | 114    | 72 to 168  | 10mg daily                           | 12       | Capsule  | Stunted only                       | None                |
| *Castillo-Duran 2002 <sup>75</sup> | CL      | 42     | 17 to 19   | 5mg daily                            | 12       | Solution | Non-stunted only                   | None                |
| Cavan 1993 <sup>76-78</sup>        | GT      | 162    | 68 to 96   | 10mg 5d/wk                           | 6.25     | Tablet   | Stunted and non-stunted; HAZ=-1.51 | Micronutrients      |
| Chang 2010 <sup>79</sup>           | BD      | 1000   | 6 to 18    | 5mg <1y; 10mg >1y alternate days     | 6        | Tablet   | Stunted and non-stunted; HAZ=-1.3  | None                |
| Chen 2012 <sup>80</sup>            | CN      | 361    | 36 to 72   | 10mg 5d/wk                           | 6        | Tablet   | HAZ=-0.264585635                   | Vitamin A           |
| Chhagan 2009 <sup>81-85</sup>      | ZA      | 227    | 6 to 6     | 10mg daily                           | 18       | Tablet   | Stunted and non-stunted; HAZ=-0.45 | Vitamin A           |
| Clark 1999 <sup>86</sup>           | UK      | 47     | mean=146   | 15mg daily                           | 1.5      | Unclear  | Non-stunted only                   | None                |
| Cole 2012 <sup>87</sup>            | BR      | 143    | 6 to 48    | 5mg daily                            | 3        | Powder   | Not reported                       | Micronutrients      |
| Dehbozorgi 2007 <sup>88</sup>      | IR      | 60     | 72 to 144  | 8mg daily                            | 6        | Solution | Not reported                       | None                |
| DiGirolamo 2010 <sup>89, 90</sup>  | GT      | 750    | 72 to 132  | 10mg 5d/wk                           | 5.8      | Tablet   | Stunted and non-stunted; HAZ=-1.2  | None                |
| Ebrahimi 2006 <sup>91</sup>        | IR      | 804    | 96 to 132  | 10mg 6d/wk                           | 7        | Solution | Not reported                       | None                |
| Fallahi 2007 <sup>92</sup>         | IR      | 53     | 132 to 143 | 20mg 6d/wk                           | 4        | Capsule  | Not reported                       | Iron                |
| Fonseca 2002 <sup>93</sup>         | BR      | 199    | 72 to 120  | 30mg weekly                          | 3        | Solution | Stunted and non-stunted            | None                |
| Friis 1997 <sup>94, 95</sup>       | ZW      | 313    | 132 to 204 | 30 mg <29.5 kg; 50 mg >29.5 kg 5d/wk | 12       | Tablet   | HAZ=-1.18                          | None                |

|                                             |    |       |             |                              |      |          |                                    |                       |
|---------------------------------------------|----|-------|-------------|------------------------------|------|----------|------------------------------------|-----------------------|
| Garcia 1998 <sup>96</sup>                   | CL | 33    | 66 to 159.6 | 20mg daily                   | 6    | Unclear  | Stunted and non-stunted; HAZ=-2.6  | None                  |
| Gibson 1989 <sup>97</sup>                   | CA | 60    | 59 to 95    | 10mg daily                   | 12   | Solution | Stunted and non-stunted; HAZ=-1.39 | None                  |
| Gracia 2005 <sup>98</sup>                   | CO | 350   | 24 to 59    | 12mg daily                   | 8    | Unclear  | Stunted and non-stunted; HAZ=0     | Micronutrients        |
| Gupta 2003 <sup>99</sup>                    | IN | 280   | 6 to 41     | 10mg or 50mg 5d/wk or weekly | 4    | Solution | Not reported                       | None                  |
| Gupta 2007 <sup>100</sup>                   | IN | 1,878 | 6 to 48     | 50mg weekly                  | 6    | Solution | Not reported                       | Vitamin B             |
| Hambidge 1978 <sup>101, 102</sup>           | US | 75    | 38 to 61    | 14mg 5d/wk                   | 6    | Solution | Not reported                       | None                  |
| Han 2002 <sup>103, 104</sup>                | CN | 119   | 36 to 60    | 3.5mg 5d/wk                  | 12   | Tablet   | Not reported                       | Vitamin A and Calcium |
| Hettiarachchi 2008 <sup>105</sup>           | LK | 341   | 144 to 155  | 14mg 5d/wk                   | 6    | Capsule  | Stunted and non-stunted; HAZ=-1.16 | None                  |
| Hong 1982 <sup>106</sup>                    | CN | 158   | 4 to 72     | Daily                        | 2.4  | Solution | Stunted and non-stunted            | Vitamin B             |
| Ince 1995 <sup>107</sup>                    | TR | 25    | 25 to 76    | 10mg daily                   | 12   | Solution | Non-stunted only; HAZ=-1.55        | None                  |
| Kartasurya 2012 <sup>108</sup>              | ID | 826   | 24 to 60    | 10mg daily                   | 4    | Solution | Non-stunted only; HAZ=-1.730145278 | Vitamin A             |
| Kikafunda 1998 <sup>109-111</sup>           | UG | 155   | 33 to 89    | 10mg 5d/wk                   | 6    | Tablet   | HAZ=-0.7                           | None                  |
| Kurugöl 2006 <sup>112</sup>                 | TR | 200   | 24 to 120   | 15mg daily                   | 7    | Solution | Not reported                       | None                  |
| Larson 2010 <sup>113, 114</sup>             | BD | 353   | 6 to 24     | 10mg daily                   | 3    | Solution | HAZ=-1.72                          | None                  |
| Lind 2003 <sup>115-118</sup>                | ID | 680   | 6 to 6      | 10mg daily                   | 6    | Solution | Stunted and non-stunted; HAZ=-0.34 | Vitamin C             |
| Long 2006 <sup>119-122</sup>                | MX | 786   | 6 to 15     | 20mg daily                   | 12   | Solution | Stunted and non-stunted; HAZ=0.1   | None                  |
| Mahloudji 1975 <sup>123</sup>               | IR | 50    | 72 to 144   | 20mg 6d/wk                   | 16   | Capsule  | Not reported                       | Micronutrients        |
| Malik 2013 <sup>124</sup>                   | IN | 158   | 6 to 11     | 20mg daily                   | 0.46 | Solution | Not reported                       | None                  |
| *Marinho 1991 <sup>125</sup>                | BR | 240   | 36 to 84    | 5mg daily                    | 1    | Unclear  | Stunted and non-stunted            | None                  |
| Mazariegos 2010 <sup>126</sup>              | GT | 412   | 6 to 6      | 5mg daily                    | 6    | Tablet   | Stunted and non-stunted; HAZ=-2.09 | Low-phytate maize     |
| Meeks Gardner 1998 <sup>127, 128</sup>      | JM | 61    | 6 to 24     | 5mg daily                    | 3    | Solution | Stunted only; HAZ=-2.9             | Micronutrients        |
| Meeks Gardner 2005 <sup>129</sup>           | JM | 126   | 9 to 30     | 10mg daily                   | 6    | Solution | HAZ=-1.42                          | Micronutrients        |
| Mozaffari-Khosravi 2009 <sup>130, 131</sup> | IR | 90    | 25 to 69    | 5mg daily                    | 6    | Solution | Stunted and non-stunted; HAZ=-1.59 | None                  |
| Muller 2001 <sup>132-134</sup>              | BF | 709   | 6 to 30     | 12.5mg 6d/wk                 | 6    | Tablet   | Stunted and non-stunted; HAZ=-1.6  | None                  |
| Nakamura 1993 <sup>135</sup>                | JP | 21    | mean=70     | 5mg/kg daily                 | 6    | Unclear  | Stunted only; HAZ=-2.44            | None                  |
| Ninh 1996 <sup>136</sup>                    | VN | 210   | 4 to 36     | 10mg daily                   | 5    | Solution | Stunted only; HAZ=-2.61            | None                  |

|                                       |    |        |            |                         |        |          |                                    |                     |
|---------------------------------------|----|--------|------------|-------------------------|--------|----------|------------------------------------|---------------------|
| Penny 2004 <sup>137, 138</sup>        | PE | 164    | 6 to 35    | 10mg daily              | 6      | Solution | Stunted and non-stunted; HAZ=-1.56 | None                |
| Rahman 2001 <sup>139-142</sup>        | BD | 800    | 12 to 35   | 20mg daily              | 0.5    | Solution | Stunted and non-stunted; HAZ=-2.41 | None                |
| Richard 2006 <sup>143</sup>           | PE | 855    | 6 to 180   | 20mg daily              | 7      | Solution | Stunted and non-stunted; HAZ=-2.08 | None                |
| Rosado 1997 <sup>144-146</sup>        | MX | 219    | 18 to 36   | 20mg 6d/wk              | 12     | Solution | Stunted and non-stunted; HAZ=-1.6  | None                |
| Rosales 2004 <sup>147</sup>           | GT | 76     | 96 to 132  | 42.5mg 5d/wk            | 2      | Solution | Not reported                       | None                |
| Ruel 1997 <sup>148-150</sup>          | GT | 108    | 6 to 9     | 10mg daily              | 7      | Solution | Stunted and non-stunted; HAZ=-2.16 | None                |
| Ruz 1997 <sup>151</sup>               | CL | 98     | 27 to 50   | 10mg daily              | 14     | Solution | Stunted and non-stunted; HAZ=-0.52 | None                |
| *Sandstead 1998 <sup>152, 153</sup>   | CN | NR     | 72 to 108  | 20mg 6d/wk              | 2.5    | Tablet   | Not reported                       | Micronutrients      |
| Sandstead 2008 <sup>154</sup>         | US | 54     | 72 to 84   | 20mg 5d/wk              | 2.5    | Unclear  | Not reported                       | Micronutrients      |
| *Sanjur 1990 <sup>155</sup>           | US | NR     | 12 to 24   | Daily                   | 6      | Tablet   | Not reported                       | Micronutrients      |
| Sayeg Porto 2000 <sup>156</sup>       | BR | 21     | 84 to 120  | 5mg/kg daily            | 6      | Solution | Stunted only; HAZ=-2.67            | None                |
| Sazawal 1996 <sup>157-166</sup>       | IN | 609    | 6 to 35    | 10mg daily              | 6      | Solution | Stunted and non-stunted            | Micronutrients      |
| Sazawal 2006 <sup>167-176</sup>       | TZ | 60,225 | 1 to 35    | 5mg <1y; 10mg >1y daily | 16     | Tablet   | Stunted and non-stunted; HAZ=-1.5  | Micronutrients      |
| Schultink 1997 <sup>177</sup>         | ID | 85     | 24 to 60   | 15mg daily              | 2      | Solution | Stunted and non-stunted; HAZ=-2.5  | Iron                |
| Sempertegui 1996 <sup>178, 179</sup>  | EC | 50     | 12 to 59   | 10mg daily              | 2      | Solution | Stunted and non-stunted; HAZ=-2    | None                |
| *Shah 2011 <sup>180</sup>             | IN | NR     | 6 to 59    | 10mg daily              | 2      | Unclear  | Not reported                       | None                |
| Shankar 2000 <sup>181, 182</sup>      | PG | 274    | 6 to 60    | 10mg 6d/wk              | 11.5   | Tablet   | Stunted and non-stunted; HAZ=-1.9  | None                |
| Silva 2006 <sup>183</sup>             | BR | 60     | 12 to 59   | 10mg daily              | 4      | Solution | Stunted and non-stunted; HAZ=-1.9  | Iron-fortified milk |
| Smith 1999 <sup>184</sup>             | BZ | 51     | Preschool  | 70mg weekly             | 6      | Solution | Stunted and non-stunted            | None                |
| Soofi 2013 <sup>185</sup>             | PK | 1305   | 6 to 6     | 10mg daily              | 12     | Powder   | Stunted and non-stunted            | Micronutrients      |
| Tielsch 2006 <sup>186-193</sup>       | NP | 49,205 | 1 to 35    | 5mg <1y; 10mg >1y daily | to 36m | Tablet   | Stunted and non-stunted            | Iron and folic acid |
| Tupe 2009 <sup>194, 195</sup>         | IN | 88     | 120 to 155 | 16.6mg 6d/wk            | 2.5    | Tablet   | Stunted and non-stunted; HAZ=-1.3  | None                |
| Uckardes 2009 <sup>196-198</sup>      | TR | 226    | 89 to 140  | 15mg 5d/wk              | 2.5    | Solution | Not reported                       | None                |
| Udomkesmalee 1992 <sup>199, 200</sup> | TH | 133    | 72 to 156  | 25mg 5d/wk              | 6      | Capsule  | Stunted and non-stunted            | Vitamin A           |
| Umeta 2000 <sup>201-203</sup>         | ET | 200    | 6 to 12    | 10mg 6d/wk              | 6      | Solution | Stunted and non-stunted; HAZ=-1.7  | None                |
| *Vakili 2009 <sup>204</sup>           | IR | 200    | 78 to 120  | 10mg 6d/wk              | 5      | Tablet   | Not reported                       | None                |

1  
2  
3  
4  
5  
6  
7  
8  
9  
10  
11  
12  
13  
14  
15  
16  
17  
18  
19  
20  
21  
22  
23  
24  
25  
26  
27  
28  
29  
30  
31  
32  
33  
34  
35  
36  
37  
38  
39  
40  
41  
42  
43  
44  
45  
46  
47  
48  
49

|                                    |    |     |          |                          |      |          |                                    |                |
|------------------------------------|----|-----|----------|--------------------------|------|----------|------------------------------------|----------------|
| Veenemans 2011 <sup>205-208</sup>  | TZ | 612 | 6 to 60  | 10mg daily               | 11   | Capsule  | Stunted and non-stunted; HAZ=-2.43 | Micronutrients |
| Walravens 1983 <sup>209, 210</sup> | US | 57  | 24 to 72 | 5mg 2x daily             | 12   | Solution | Stunted and non-stunted; HAZ=-2.07 | None           |
| Walravens 1989 <sup>211</sup>      | US | NR  | 8 to 27  | 25mg (frequency unclear) | 6    | Solution | HAZ=-1.35                          | None           |
| Wessells 2012 <sup>212, 213</sup>  | BF | 451 | 6 to 23  | 5mg daily                | 0.75 | Solution | HAZ=-1.5                           | None           |
| Wuehler 2008 <sup>214, 215</sup>   | EC | 503 | 12 to 30 | 3, 7, or 10mg daily      | 6    | Solution | Stunted and non-stunted; HAZ=-2.3  | None           |

\*Not included in meta-analysis; Age and duration reported in months

For peer review only



Appendix 5: Risk of bias

|                     | Random sequence generation (selection bias) | Allocation concealment (selection bias) | Blinding of participants (performance bias) | Blinding of personnel (performance bias) | Blinding of outcome assessment (detection bias) | Incomplete outcome data (attrition bias) | Selective reporting (reporting bias) | Other bias |
|---------------------|---------------------------------------------|-----------------------------------------|---------------------------------------------|------------------------------------------|-------------------------------------------------|------------------------------------------|--------------------------------------|------------|
| Ahmed 2009          | ?                                           | ?                                       | ?                                           | ?                                        | ?                                               | +                                        | ?                                    | +          |
| Akramuzzaman 1994   | ?                                           | ?                                       | ?                                           | ?                                        | ?                                               | ?                                        | ?                                    | +          |
| Alarcon 2004        | ?                                           | ?                                       | +                                           | +                                        | +                                               | +                                        | ?                                    | +          |
| Albert 2003         | ?                                           | +                                       | +                                           | +                                        | +                                               | +                                        | +                                    | +          |
| Ba Lo 2011          | +                                           | ?                                       | +                                           | +                                        | +                                               | +                                        | +                                    | +          |
| Baqui 2003          | ?                                           | ?                                       | +                                           | +                                        | +                                               | +                                        | +                                    | +          |
| Bhandari 2002       | +                                           | +                                       | +                                           | +                                        | +                                               | +                                        | +                                    | +          |
| Bhandari 2007       | +                                           | +                                       | +                                           | +                                        | +                                               | +                                        | +                                    | +          |
| Brown 2007          | +                                           | +                                       | +                                           | +                                        | +                                               | ?                                        | +                                    | +          |
| Castillo-Duran 1994 | ?                                           | ?                                       | +                                           | +                                        | +                                               | ?                                        | +                                    | +          |
| Castillo-Duran 2002 | ?                                           | ?                                       | ?                                           | ?                                        | ?                                               | ?                                        | +                                    | +          |
| Cavan 1993          | +                                           | +                                       | +                                           | +                                        | +                                               | +                                        | +                                    | +          |
| Chang 2010          | +                                           | +                                       | +                                           | +                                        | +                                               | +                                        | ?                                    | +          |
| Chen 2012           | ?                                           | ?                                       | +                                           | +                                        | ?                                               | ?                                        | ?                                    | +          |
| Chhagan 2009        | +                                           | +                                       | +                                           | +                                        | +                                               | ?                                        | +                                    | ?          |
| Clark 1999          | ?                                           | ?                                       | +                                           | +                                        | +                                               | +                                        | ?                                    | +          |
| Cole 2012           | +                                           | ?                                       | +                                           | +                                        | +                                               | +                                        | ?                                    | +          |
| Dehbozorgi 2007     | ?                                           | ?                                       | +                                           | +                                        | +                                               | ?                                        | +                                    | +          |
| DiGirolamo 2010     | +                                           | +                                       | +                                           | +                                        | +                                               | +                                        | ?                                    | +          |
| Ebrahimi 2006       | ?                                           | ?                                       | +                                           | +                                        | +                                               | ?                                        | ?                                    | +          |
| Fallahi 2007        | ?                                           | ?                                       | ?                                           | ?                                        | ?                                               | +                                        | ?                                    | +          |
| Fonseca 2002        | +                                           | ?                                       | +                                           | +                                        | +                                               | ?                                        | +                                    | +          |
| Friis 1997          | ?                                           | ?                                       | +                                           | +                                        | +                                               | ?                                        | +                                    | +          |
| Garcia 1998         | ?                                           | ?                                       | +                                           | +                                        | +                                               | +                                        | ?                                    | +          |
| Gibson 1989         | ?                                           | +                                       | +                                           | +                                        | +                                               | +                                        | ?                                    | +          |
| Gracia 2005         | ?                                           | ?                                       | +                                           | +                                        | +                                               | ?                                        | +                                    | +          |
| Gupta 2003          | +                                           | +                                       | +                                           | +                                        | +                                               | +                                        | +                                    | +          |
| Gupta 2007          | ?                                           | ?                                       | +                                           | +                                        | +                                               | +                                        | +                                    | +          |
| Hambidge 1978       | ?                                           | ?                                       | ?                                           | ?                                        | ?                                               | ?                                        | ?                                    | +          |
| Han 2002            | ?                                           | ?                                       | +                                           | +                                        | +                                               | ?                                        | ?                                    | +          |
| Hettiarachchi 2008  | ?                                           | ?                                       | +                                           | +                                        | +                                               | ?                                        | ?                                    | +          |
| Hong 1982           | ?                                           | ?                                       | ?                                           | ?                                        | ?                                               | ?                                        | ?                                    | +          |
| Ince 1995           | +                                           | ?                                       | +                                           | +                                        | +                                               | +                                        | ?                                    | +          |
| Kartasurya 2012     | +                                           | +                                       | +                                           | +                                        | +                                               | +                                        | +                                    | +          |
| Kikafunda 1998      | ?                                           | ?                                       | +                                           | +                                        | +                                               | ?                                        | +                                    | +          |
| Kurugöl 2006        | +                                           | +                                       | +                                           | +                                        | +                                               | +                                        | ?                                    | +          |
| Larson 2010         | +                                           | +                                       | +                                           | +                                        | +                                               | +                                        | +                                    | +          |

Review only

1  
2  
3  
4  
5  
6  
7  
8  
9  
10  
11  
12  
13  
14  
15  
16  
17  
18  
19  
20  
21  
22  
23  
24  
25  
26  
27  
28  
29  
30  
31  
32  
33  
34  
35  
36  
37  
38  
39  
40  
41  
42  
43  
44  
45  
46  
47  
48  
49  
50  
51  
52  
53  
54  
55  
56  
57  
58  
59  
60

|                         | Random sequence generation (selection bias) | Allocation concealment (selection bias) | Blinding of participants (performance bias) | Blinding of personnel (performance bias) | Blinding of outcome assessment (detection bias) | Incomplete outcome data (attrition bias) | Selective reporting (reporting bias) | Other bias |
|-------------------------|---------------------------------------------|-----------------------------------------|---------------------------------------------|------------------------------------------|-------------------------------------------------|------------------------------------------|--------------------------------------|------------|
| Lind 2003               | ?                                           | +                                       | +                                           | +                                        | +                                               | +                                        | +                                    | +          |
| Long 2006               | +                                           | +                                       | +                                           | +                                        | +                                               | +                                        | ?                                    | +          |
| Mahloudji 1975          | ?                                           | ?                                       | +                                           | +                                        | +                                               | ?                                        | +                                    | +          |
| Malik 2013              | +                                           | +                                       | +                                           | +                                        | +                                               | +                                        | +                                    | +          |
| Marinho 1991            | ?                                           | ?                                       | ?                                           | ?                                        | ?                                               | ?                                        | ?                                    | +          |
| Mazariegos 2010         | +                                           | +                                       | +                                           | +                                        | +                                               | +                                        | +                                    | +          |
| Meeks Gardner 1998      | ?                                           | ?                                       | +                                           | +                                        | +                                               | ?                                        | ?                                    | +          |
| Meeks Gardner 2005      | ?                                           | ?                                       | +                                           | +                                        | +                                               | +                                        | ?                                    | ?          |
| Mozaffari-Khosravi 2009 | +                                           | +                                       | +                                           | +                                        | +                                               | ?                                        | ?                                    | +          |
| Muller 2001             | +                                           | +                                       | +                                           | +                                        | +                                               | +                                        | ?                                    | +          |
| Nakamura 1993           | ?                                           | ?                                       | ?                                           | ?                                        | ?                                               | ?                                        | ?                                    | +          |
| Ninh 1996               | ?                                           | ?                                       | +                                           | +                                        | +                                               | ?                                        | +                                    | +          |
| Penny 2004              | +                                           | ?                                       | +                                           | +                                        | +                                               | +                                        | ?                                    | +          |
| Rahman 2001             | +                                           | +                                       | +                                           | +                                        | +                                               | +                                        | +                                    | +          |
| Richard 2006            | +                                           | ?                                       | +                                           | +                                        | +                                               | +                                        | ?                                    | +          |
| Rosado 1997             | ?                                           | ?                                       | +                                           | +                                        | +                                               | +                                        | ?                                    | +          |
| Rosales 2004            | +                                           | ?                                       | +                                           | +                                        | +                                               | +                                        | ?                                    | +          |
| Ruel 1997               | ?                                           | ?                                       | +                                           | +                                        | +                                               | +                                        | ?                                    | +          |
| Ruz 1997                | ?                                           | +                                       | +                                           | +                                        | +                                               | ?                                        | +                                    | +          |
| Sandstead 1998          | ?                                           | ?                                       | +                                           | +                                        | +                                               | ?                                        | +                                    | +          |
| Sandstead 2008          | ?                                           | +                                       | +                                           | +                                        | +                                               | ?                                        | ?                                    | +          |
| Sanjur 1990             | ?                                           | ?                                       | +                                           | +                                        | +                                               | ?                                        | ?                                    | +          |
| Sayeg Porto 2000        | ?                                           | +                                       | +                                           | +                                        | +                                               | ?                                        | +                                    | +          |
| Sazawal 1996            | +                                           | +                                       | +                                           | +                                        | +                                               | +                                        | +                                    | +          |
| Sazawal 2006            | +                                           | +                                       | +                                           | +                                        | +                                               | +                                        | +                                    | +          |
| Schultink 1997          | ?                                           | ?                                       | +                                           | +                                        | +                                               | ?                                        | ?                                    | +          |
| Sempertegui 1996        | +                                           | ?                                       | +                                           | +                                        | +                                               | +                                        | ?                                    | +          |
| Shah 2011               | ?                                           | ?                                       | ?                                           | ?                                        | ?                                               | ?                                        | +                                    | +          |
| Shankar 2000            | +                                           | +                                       | +                                           | +                                        | +                                               | +                                        | +                                    | +          |
| Silva 2006              | ?                                           | ?                                       | ?                                           | ?                                        | ?                                               | +                                        | +                                    | +          |
| Smith 1999              | ?                                           | ?                                       | ?                                           | ?                                        | ?                                               | +                                        | ?                                    | ?          |
| Soofi 2013              | +                                           | +                                       | +                                           | +                                        | +                                               | +                                        | +                                    | +          |
| Tielsch 2006            | +                                           | +                                       | +                                           | +                                        | +                                               | +                                        | ?                                    | +          |
| Tupe 2009               | +                                           | ?                                       | ?                                           | ?                                        | +                                               | +                                        | ?                                    | +          |

Review only

1  
2  
3  
4  
5  
6  
7  
8  
9  
10  
11  
12  
13  
14  
15  
16  
17  
18  
19  
20  
21  
22  
23  
24  
25  
26  
27  
28  
29  
30  
31  
32  
33  
34  
35  
36  
37  
38  
39  
40  
41  
42  
43  
44  
45  
46  
47  
48  
49  
50  
51  
52  
53  
54  
55  
56  
57  
58  
59  
60

|                   | Random sequence generation (selection bias) | Allocation concealment (selection bias) | Blinding of participants (performance bias) | Blinding of personnel (performance bias) | Blinding of outcome assessment (detection bias) | Incomplete outcome data (attrition bias) | Selective reporting (reporting bias) | Other bias |
|-------------------|---------------------------------------------|-----------------------------------------|---------------------------------------------|------------------------------------------|-------------------------------------------------|------------------------------------------|--------------------------------------|------------|
| Uckardes 2009     | ?                                           | ?                                       | +                                           | +                                        | +                                               | +                                        | ?                                    | ?          |
| Udomkesmalee 1992 | ?                                           | ?                                       | +                                           | +                                        | +                                               | +                                        | +                                    | +          |
| Umeta 2000        | ?                                           | ?                                       | +                                           | +                                        | +                                               | +                                        | ?                                    | +          |
| Vakili 2009       | ?                                           | ?                                       | ?                                           | ?                                        | ?                                               | +                                        | ?                                    | +          |
| Veenemans 2011    | +                                           | +                                       | +                                           | +                                        | +                                               | +                                        | +                                    | +          |
| Walravens 1983    | ?                                           | +                                       | +                                           | +                                        | +                                               | ?                                        | ?                                    | +          |
| Walravens 1989    | ?                                           | ?                                       | +                                           | +                                        | +                                               | ?                                        | ?                                    | +          |
| Wessells 2012     | +                                           | +                                       | ?                                           | ?                                        | ?                                               | +                                        | ?                                    | +          |
| Wuehler 2008      | +                                           | +                                       | +                                           | +                                        | +                                               | +                                        | +                                    | +          |

er review only

## Appendix 6: Subgroup analyses

| Subgroup                                                                         | Trials    | People       | Effect size (95% CI), fixed | I <sup>2</sup> ; Chi <sup>2</sup> (p value) |
|----------------------------------------------------------------------------------|-----------|--------------|-----------------------------|---------------------------------------------|
| <b>Prevalence of diarrhoea (RR)</b>                                              | <b>13</b> | <b>8519</b>  | <b>0.88 (0.86 to 0.90)</b>  | <b>88%; 118.88 (p&lt;0.00001)</b>           |
| <i>Iron co-supplementation (I<sup>2</sup>=75%; Chi<sup>2</sup>=3.97, p=0.05)</i> |           |              |                             |                                             |
| with iron                                                                        | 3         | 1024         | 0.96 (0.88 to 1.05)         | 96%; 46.97 (p<0.00001)                      |
| without iron                                                                     | 11        | 7495         | 0.88 (0.86 to 0.90)         | 84%; 67.94 (p<0.00001)                      |
| <i>Age (I<sup>2</sup>=97%; Chi<sup>2</sup>=30.52, p&lt;0.00001)</i>              |           |              |                             |                                             |
| 6m to 1y                                                                         | 7         | 3714         | 0.96 (0.93 to 1.00)         | 94%; 112.81 (p<0.00001)                     |
| 1y to 5y                                                                         | 7         | 4805         | 0.85 (0.83 to 0.87)         | 37%; 11.03 (p=0.14)                         |
| <i>Dose (I<sup>2</sup>=94%; Chi<sup>2</sup>=61.69, p&lt;0.00001)</i>             |           |              |                             |                                             |
| 0mg to 5mg                                                                       | 2         | 1200         | 1.00 (0.92 to 1.08)         | 94%; 33.41 (p<0.00001)                      |
| 5mg to 10mg                                                                      | 1         | 274          | 1.17 (0.60 to 2.28)         | Not applicable                              |
| 10mg to 15mg                                                                     | 6         | 3434         | 0.93 (0.90 to 0.96)         | 66%; 14.53 (p=0.01)                         |
| 15mg to 20mg                                                                     | 1         | 258          | 0.61 (0.54 to 0.69)         | Not applicable                              |
| 20mg or more                                                                     | 3         | 3353         | 0.85 (0.82 to 0.87)         | 68%; 9.24 (p=0.03)                          |
| <i>Duration (I<sup>2</sup>=86%; Chi<sup>2</sup>=13.98, p=0.0009)</i>             |           |              |                             |                                             |
| 0m to 6m                                                                         | 3         | 3353         | 0.85 (0.82 to 0.87)         | 68%; 9.24 (p=0.03)                          |
| 6m to 12m                                                                        | 9         | 4957         | 0.92 (0.89 to 0.95)         | 91%; 95.66 (p<0.00001)                      |
| 12m or more                                                                      | 1         | 209          | 0.88 (0.74 to 1.03)         | Not applicable                              |
| <i>Formulation (I<sup>2</sup>=86%; Chi<sup>2</sup>=13.99, p=0.0009)</i>          |           |              |                             |                                             |
| Solution                                                                         | 8         | 4657         | 0.88 (0.85 to 0.90)         | 92%; 97.84 (p<0.00001)                      |
| Pill/tablet                                                                      | 4         | 2144         | 0.86 (0.81 to 0.92)         | 43%; 7.05 (p=0.13)                          |
| Capsule                                                                          | 1         | 1718         | 1.03 (0.95 to 1.12)         | Not applicable                              |
| <b>Incidence of LRTI (RR)</b>                                                    | <b>12</b> | <b>9610</b>  | <b>1.00 (0.94 to 1.07)</b>  | <b>1%; 17.16 (p=0.44)</b>                   |
| <i>Iron co-supplementation (I<sup>2</sup>=0%; Chi<sup>2</sup>=0.06, p=0.80)</i>  |           |              |                             |                                             |
| with iron                                                                        | 5         | 2896         | 0.99 (0.87 to 1.12)         | 0%; 2.92 (p=0.71)                           |
| without iron                                                                     | 10        | 6714         | 1.01 (0.93 to 1.08)         | 22%; 14.17 (p=0.22)                         |
| <i>Age (I<sup>2</sup>=0%; Chi<sup>2</sup>=1.50, p=0.47)</i>                      |           |              |                             |                                             |
| 6m to 1y                                                                         | 5         | 3566         | 0.97 (0.88 to 1.07)         | 0%; 2.12 (p=0.95)                           |
| 1y to 5y                                                                         | 5         | 4605         | 1.05 (0.96 to 1.16)         | 25%; 8.01 (p=0.24)                          |
| 5y to 13y                                                                        | 1         | 836          | 1.00 (0.72 to 1.40)         | Not applicable                              |
| <i>Dose (I<sup>2</sup>=0%; Chi<sup>2</sup>=0.60, p=0.74)</i>                     |           |              |                             |                                             |
| 0mg to 5mg                                                                       | 3         | 845          | 0.94 (0.78 to 1.13)         | 0%; 0.93 (p=0.63)                           |
| 10mg to 15mg                                                                     | 8         | 4045         | 1.00 (0.91 to 1.10)         | 25%; 9.32 (p=0.23)                          |
| 20mg or more                                                                     | 7         | 4720         | 1.02 (0.92 to 1.13)         | 5%; 6.31 (p=0.39)                           |
| <i>Duration (I<sup>2</sup>=0%; Chi<sup>2</sup>=0.79, p=0.67)</i>                 |           |              |                             |                                             |
| 0m to 6m                                                                         | 2         | 3148         | 1.03 (0.92 to 1.14)         | 67%; 6.05 (p=0.05)                          |
| 6m to 12m                                                                        | 8         | 5114         | 0.98 (0.90 to 1.06)         | 0%; 9.69 (p=0.47)                           |
| 12m or more                                                                      | 2         | 1348         | 1.08 (0.83 to 1.42)         | 0%; 0.64 (p=0.89)                           |
| <i>Formulation (I<sup>2</sup>=20%; Chi<sup>2</sup>=3.73, p=0.29)</i>             |           |              |                             |                                             |
| Solution                                                                         | 9         | 7007         | 0.98 (0.91 to 1.05)         | 2%; 13.25 (p=0.43)                          |
| Pill/tablet                                                                      | 1         | 686          | 1.19 (0.93 to 1.51)         | Not applicable                              |
| Capsule                                                                          | 1         | 612          | 1.12 (0.84 to 1.51)         | Not applicable                              |
| Powder                                                                           | 1         | 1305         | 1.25 (0.75 to 2.09)         | Not applicable                              |
| <b>Height (SMD)</b>                                                              | <b>51</b> | <b>13669</b> | <b>0.09 (0.06 to 0.13)</b>  | <b>86%; 407.92 (p&lt;0.00001)</b>           |
| <i>Iron co-supplementation (I<sup>2</sup>=85%; Chi<sup>2</sup>=6.60, p=0.01)</i> |           |              |                             |                                             |
| with iron                                                                        | 12        | 2929         | 0.01 (-0.07 to 0.08)        | 29%; 15.48 (p=0.16)                         |
| without iron                                                                     | 44        | 10510        | 0.12 (0.08 to 0.16)         | 88%; 385.12 (p<0.00001)                     |
| <i>Age (I<sup>2</sup>=98%; Chi<sup>2</sup>=117.89, p&lt;0.00001)</i>             |           |              |                             |                                             |
| 6m to 1y                                                                         | 9         | 3730         | -0.26 (-0.33 to 0.19)       | 94%; 204.70 (p<0.00001)                     |
| 1y to 5y                                                                         | 24        | 6155         | 0.09 (0.04 to 0.14)         | 42%; 44.94 (p=0.01)                         |
| 5y to 13y                                                                        | 16        | 3449         | 0.25 (0.18 to 0.32)         | 94%; 277.24 (p<0.00001)                     |
| <i>Dose (I<sup>2</sup>=91%; Chi<sup>2</sup>=43.60, p&lt;0.00001)</i>             |           |              |                             |                                             |
| 0mg to 5mg                                                                       | 5         | 1170         | 0.02 (0.10 to 0.13)         | 58%; 14.30 (p=0.03)                         |
| 5mg to 10mg                                                                      | 8         | 2978         | 0.29 (0.22 to 0.37)         | 96%; 271.49 (p<0.00001)                     |
| 10mg to 15mg                                                                     | 22        | 4344         | 0.06 (0.00 to 0.12)         | 29%; 33.90 (p=0.09)                         |
| 15mg to 20mg                                                                     | 2         | 240          | -0.01 (-0.26 to 0.24)       | 39%; 3.26 (p=0.20)                          |
| 20mg or more                                                                     | 3         | 4675         | -0.01 (0.07 to 0.05)        | 11%; 11.22 (p=0.34)                         |
| <i>Duration (I<sup>2</sup>=91%; Chi<sup>2</sup>=21.62, p&lt;0.00001)</i>         |           |              |                             |                                             |
| 0m to 6m                                                                         | 12        | 4475         | -0.01 (-0.07 to 0.04)       | 76%; 50.43 (p<0.00001)                      |
| 6m to 12m                                                                        | 26        | 6479         | 0.17 (0.12 to 0.22)         | 91%; 313.67 (p<0.00001)                     |
| 12m or more                                                                      | 12        | 2715         | 0.10 (0.02 to 0.17)         | 32%; 22.21 (p=0.10)                         |
| <i>Iron co-supplementation (I<sup>2</sup>=85%; Chi<sup>2</sup>=6.60, p=0.01)</i> |           |              |                             |                                             |
| with iron                                                                        | 12        | 2929         | 0.01 (-0.07 to 0.08)        | 29%; 15.48 (p=0.16)                         |
| without iron                                                                     | 44        | 10510        | 0.12 (0.08 to 0.16)         | 88%; 385.12 (p<0.00001)                     |
| <i>Formulation (I<sup>2</sup>=75%; Chi<sup>2</sup>=8.03, p=0.02)</i>             |           |              |                             |                                             |
| Solution                                                                         | 32        | 9030         | 0.12 (0.07 to 0.16)         | 90%; 367.20 (p<0.00001)                     |
| Pill/tablet                                                                      | 11        | 3868         | 0.02 (-0.04 to 0.09)        | 9%; 12.11 (p=0.36)                          |
| Capsule                                                                          | 2         | 322          | 0.31 (0.03 to 0.59)         | 0%; 0.90 (p=0.64)                           |
| <b>Weight (SMD)</b>                                                              | <b>44</b> | <b>12305</b> | <b>0.10 (0.07 to 0.14)</b>  | <b>76%; 216.64 (p&lt;0.00001)</b>           |
| <i>Iron co-supplementation (I<sup>2</sup>=34%; Chi<sup>2</sup>=1.50, p=0.22)</i> |           |              |                             |                                             |
| with iron                                                                        | 10        | 2494         | 0.06 (-0.02 to 0.14)        | 5%; 9.50 (p=0.39)                           |
| without iron                                                                     | 39        | 9811         | 0.12 (0.08 to 0.16)         | 80%; 205.63 (p<0.00001)                     |

|                                                                                                               |    |      |                        |                             |
|---------------------------------------------------------------------------------------------------------------|----|------|------------------------|-----------------------------|
| Age ( $I^2=99\%$ ; $Chi^2=136.86$ , $p<0.00001$ )                                                             |    |      |                        |                             |
| 6m to 1y                                                                                                      | 9  | 3730 | -0.31 (-0.38 to -0.25) | 97%; 387.48 ( $p<0.00001$ ) |
| 1y to 5y                                                                                                      | 20 | 5565 | 0.06 (0.01 to 0.11)    | 43%; 38.72 ( $p=0.02$ )     |
| 5y to 13y                                                                                                     | 13 | 2654 | 0.28 (0.20 to 0.36)    | 89%; 117.28 ( $p<0.00001$ ) |
| Dose ( $I^2=89\%$ ; $Chi^2=35.38$ , $p<0.00001$ )                                                             |    |      |                        |                             |
| 0mg to 5mg                                                                                                    | 5  | 1170 | 0.00 (-0.11 to 0.12)   | 0%; 2.79 ( $p=0.83$ )       |
| 5mg to 10mg                                                                                                   | 10 | 2766 | 0.27 (0.20 to 0.35)    | 92%; 108.31 ( $p<0.00001$ ) |
| 10mg to 15mg                                                                                                  | 19 | 3969 | 0.11 (0.04 to 0.17)    | 34%; 31.75 ( $p=0.06$ )     |
| 15mg to 20mg                                                                                                  | 2  | 240  | -0.20 (-0.45 to 0.06)  | 13%; 2.30 ( $p=0.32$ )      |
| 20mg or more                                                                                                  | 7  | 3919 | 0.01 (-0.05 to 0.08)   | 36%; 12.43 ( $p=0.13$ )     |
| Duration ( $I^2=92\%$ ; $Chi^2=23.59$ , $p<0.00001$ )                                                         |    |      |                        |                             |
| 0m to 6m                                                                                                      | 11 | 4417 | 0.05 (0.00 to 0.11)    | 76%; 44.95 ( $p<0.00001$ )  |
| 6m to 12m                                                                                                     | 22 | 5289 | 0.20 (0.15 to 0.26)    | 82%; 131.52 ( $p<0.00001$ ) |
| 12m or more                                                                                                   | 11 | 2599 | -0.01 (-0.07 to 0.09)  | 16%; 16.58 ( $p=0.28$ )     |
| Formulation ( $I^2=87\%$ ; $Chi^2=15.43$ , $p=0.0004$ )                                                       |    |      |                        |                             |
| Solution                                                                                                      | 29 | 8147 | 0.14 (0.10 to 0.19)    | 82%; 182.72 ( $p<0.00001$ ) |
| Pill/tablet                                                                                                   | 10 | 3656 | 0.01 (-0.06 to 0.08]   | 13%; 11.51 ( $p=0.32$ )     |
| Capsule                                                                                                       | 2  | 304  | 0.41 (0.12 to 0.71)    | 0%; 1.21 ( $p=0.55$ )       |
| <b>Weight-to-height ratio (SMD) 24 7901 0.05 (0.01 to 0.10) 20%; 34.96 (<math>p=0.17</math>)</b>              |    |      |                        |                             |
| Iron co-supplementation ( $I^2=72\%$ ; $Chi^2=3.51$ , $p=0.06$ )                                              |    |      |                        |                             |
| with iron                                                                                                     | 8  | 1409 | 0.14 (0.03 to 0.24)    | 14%; 8.10 ( $p=0.32$ )      |
| without iron                                                                                                  | 19 | 6262 | 0.03 (-0.02 to 0.08)   | 16%; 22.67 ( $p=0.25$ )     |
| Age ( $I^2=30\%$ ; $Chi^2=11.45$ , $p=0.18$ )                                                                 |    |      |                        |                             |
| 6m to 1y                                                                                                      | 7  | 2559 | 0.03 (-0.04 to 0.11)   | 30%; 11.45 ( $p=0.18$ )     |
| 1y to 5y                                                                                                      | 12 | 4302 | 0.02 (-0.05 to 0.08)   | 7%; 13.95 ( $p=0.38$ )      |
| 5y to 13y                                                                                                     | 5  | 857  | 0.07 (-0.06 to 0.20)   | 0%; 3.20 ( $p=0.67$ )       |
| Dose ( $I^2=11\%$ ; $Chi^2=4.52$ , $p=0.34$ )                                                                 |    |      |                        |                             |
| 0mg to 5mg                                                                                                    | 4  | 671  | 0.07 (-0.08 to 0.22)   | 0%; 1.02 ( $p=0.91$ )       |
| 5mg to 10mg                                                                                                   | 6  | 1229 | 0.01 (-0.01 to 0.12)   | 30%; 7.16 ( $p=0.21$ )      |
| 10mg to 15mg                                                                                                  | 10 | 2389 | 0.08 (-0.01 to 0.16)   | 47%; 18.79 ( $p=0.04$ )     |
| 15mg to 20mg                                                                                                  | 1  | 194  | -0.22 (-0.50 to 0.06)  | Not applicable              |
| 20mg or more                                                                                                  | 4  | 3576 | 0.06 (0.00 to 0.13)    | 0%; 2.43 ( $p=0.79$ )       |
| Duration ( $I^2=18.2\%$ ; $Chi^2=2.45$ , $p=0.29$ )                                                           |    |      |                        |                             |
| 0m to 6m                                                                                                      | 5  | 3337 | 0.07 (0.00 to 0.14)    | 0%; 2.14 ( $p=0.83$ )       |
| 6m to 12m                                                                                                     | 15 | 4212 | 0.05 (-0.01 to 0.11)   | 38%; 27.40 ( $p=0.05$ )     |
| 12m or more                                                                                                   | 4  | 352  | -0.10 (-0.31 to 0.11)  | 0%; 2.98 ( $p=0.56$ )       |
| Formulation ( $I^2=49\%$ ; $Chi^2=1.97$ , $p=0.16$ )                                                          |    |      |                        |                             |
| Solution                                                                                                      | 17 | 6019 | 0.06 (0.01 to 0.12)    | 0%; 20.92 ( $p=0.46$ )      |
| Pill/tablet                                                                                                   | 6  | 1652 | -0.01 (-0.11 to 0.08)  | 56%; 11.38 ( $p=0.04$ )     |
| <b>Plasma zinc (SMD) 46 9810 0.62 (0.58 to 0.67) 91%; 582.45 (<math>p&lt;0.00001</math>)</b>                  |    |      |                        |                             |
| Iron co-supplementation ( $I^2=96\%$ ; $Chi^2=27.07$ , $p<0.00001$ )                                          |    |      |                        |                             |
| with iron                                                                                                     | 17 | 3231 | 0.47 (0.39 to 0.54)    | 82%; 90.82 ( $p<0.00001$ )  |
| without iron                                                                                                  | 37 | 6579 | 0.70 (0.65 to 0.75)    | 92%; 464.56 ( $p<0.00001$ ) |
| Age ( $I^2=95\%$ ; $Chi^2=40.84$ , $p<0.00001$ )                                                              |    |      |                        |                             |
| 6m to 1y                                                                                                      | 8  | 2042 | 0.46 (0.37 to 0.55)    | 87%; 74.18 ( $p<0.00001$ )  |
| 1y to 5y                                                                                                      | 19 | 4911 | 0.75 (0.69 to 0.81)    | 93%; 309.84 ( $p<0.00001$ ) |
| 5y to 13y                                                                                                     | 17 | 2375 | 0.47 (0.38 to 0.55)    | 83%; 116.75 ( $p<0.00001$ ) |
| Dose ( $I^2=92\%$ ; $Chi^2=49.94$ , $p<0.00001$ )                                                             |    |      |                        |                             |
| 0mg to 5mg                                                                                                    | 4  | 855  | 0.35 (0.21 to 0.49)    | 26%; 6.72 ( $p=0.24$ )      |
| 5mg to 10mg                                                                                                   | 8  | 1762 | 0.49 (0.40 to 0.59)    | 93%; 102.83 ( $p<0.00001$ ) |
| 10mg to 15mg                                                                                                  | 20 | 4596 | 0.62 (0.56 to 0.68)    | 86%; 158.02 ( $p<0.00001$ ) |
| 15mg to 20mg                                                                                                  | 6  | 535  | 0.76 (0.58 to 0.94)    | 86%; 51.51 ( $p<0.00001$ )  |
| 20mg or more                                                                                                  | 6  | 1724 | 0.88 (0.78 to 0.98)    | 95%; 161.54 ( $p<0.00001$ ) |
| Duration ( $I^2=94\%$ ; $Chi^2=32.98$ , $p<0.00001$ )                                                         |    |      |                        |                             |
| 0m to 6m                                                                                                      | 15 | 3079 | 0.81 (0.73 to 0.88)    | 94%; 285.66 ( $p<0.00001$ ) |
| 6m to 12m                                                                                                     | 22 | 4347 | 0.52 (0.46 to 0.58)    | 85%; 178.87 ( $p<0.00001$ ) |
| 12m or more                                                                                                   | 9  | 2384 | 0.59 (0.50 to 0.67)    | 88%; 84.94 ( $p<0.00001$ )  |
| Formulation ( $I^2=98\%$ ; $Chi^2=149.23$ , $p<0.00001$ )                                                     |    |      |                        |                             |
| Solution                                                                                                      | 25 | 4741 | 0.78 (0.72 to 0.84)    | 90%; 293.32 ( $p<0.00001$ ) |
| Pill/tablet                                                                                                   | 12 | 3553 | 0.42 (0.35 to 0.49)    | 88%; 96.60 ( $p<0.00001$ )  |
| Capsule                                                                                                       | 5  | 1115 | 1.07 (0.94 to 1.21)    | 88%; 56.53 ( $p<0.00001$ )  |
| Powder                                                                                                        | 1  | 401  | -0.06 (-0.25 to 0.14)  | Not applicable              |
| <b>Prevalence of zinc deficiency (RR) 15 5434 0.49 (0.45 to 0.53) 86%; 144.77 (<math>p&lt;0.00001</math>)</b> |    |      |                        |                             |
| Iron co-supplementation ( $I^2=97\%$ ; $Chi^2=34.27$ , $p<0.00001$ )                                          |    |      |                        |                             |
| with iron                                                                                                     | 6  | 1704 | 0.62 (0.55 to 0.69)    | 69%; 16.19 ( $p=0.006$ )    |
| without iron                                                                                                  | 14 | 3840 | 0.37 (0.33 to 0.42)    | 85%; 94.31 ( $p<0.00001$ )  |
| Age ( $I^2=92\%$ ; $Chi^2=24.36$ , $p<0.00001$ )                                                              |    |      |                        |                             |
| 6m to 1y                                                                                                      | 1  | 549  | 0.62 (0.54 to 0.70)    | 0%; 0.07 ( $p=0.79$ )       |
| 1y to 5y                                                                                                      | 9  | 3761 | 0.41 (0.37 to 0.47)    | 91%; 116.81 ( $p<0.00001$ ) |
| 5y to 13y                                                                                                     | 5  | 1234 | 0.31 (0.20 to 0.49)    | 0%; 3.53 ( $p=0.74$ )       |
| Dose ( $I^2=96\%$ ; $Chi^2=74.93$ , $p<0.00001$ )                                                             |    |      |                        |                             |
| 5mg to 10mg                                                                                                   | 3  | 1181 | 0.34 (0.27 to 0.44)    | 71%; 6.81 ( $p=0.03$ )      |
| 10mg to 15mg                                                                                                  | 7  | 2890 | 0.57 (0.52 to 0.63)    | 81%; 48.40 ( $p<0.00001$ )  |
| 15mg to 20mg                                                                                                  | 1  | 194  | 0.46 (0.24 to 0.89)    | 0%; 0.26 ( $p=0.61$ )       |
| 20mg or more                                                                                                  | 4  | 1279 | 0.14 (0.10 to 0.19)    | 65%; 14.28 ( $p=0.01$ )     |

|                                                                                                                 |                     |    |      |                        |                             |
|-----------------------------------------------------------------------------------------------------------------|---------------------|----|------|------------------------|-----------------------------|
| <b>Duration</b> ( $I^2=97\%$ ; $Chi^2=71.67$ , $p<0.00001$ )                                                    |                     |    |      |                        |                             |
|                                                                                                                 | <i>0m to 6m</i>     | 6  | 2554 | 0.22 (0.18 to 0.27)    | 72%; 24.89 ( $p=0.0008$ )   |
|                                                                                                                 | <i>6m to 12m</i>    | 5  | 1043 | 0.59 (0.53 to 0.67)    | 35%; 9.19 ( $p=0.16$ )      |
|                                                                                                                 | <i>12m or more</i>  | 4  | 1947 | 0.55 (0.48 to 0.64)    | 87%; 39.02 ( $p<0.00001$ )  |
| <b>Formulation</b> ( $I^2=91\%$ ; $Chi^2=22.12$ , $p<0.00001$ )                                                 |                     |    |      |                        |                             |
|                                                                                                                 | <i>Solution</i>     | 7  | 2415 | 0.49 (0.44 to 0.54)    | 89%; 87.85 ( $p<0.00001$ )  |
|                                                                                                                 | <i>Pill/tablet</i>  | 7  | 2392 | 0.59 (0.50 to 0.68)    | 80%; 29.32 ( $p<0.0001$ )   |
|                                                                                                                 | <i>Capsule</i>      | 2  | 883  | 0.29 (0.23 to 0.37)    | 60%; 7.43 ( $p=0.06$ )      |
| <b>Blood haemoglobin (SMD)</b> <b>27</b> <b>6024</b> <b>-0.05 (-0.10 to 0.00)</b> <b>45%; 63.96 (p=0.002)</b>   |                     |    |      |                        |                             |
| <b>Iron co-supplementation</b> ( $I^2=0\%$ ; $Chi^2=0.70$ , $p=0.40$ )                                          |                     |    |      |                        |                             |
|                                                                                                                 | <i>with iron</i>    | 17 | 3098 | -0.01 (-0.08 to 0.07)  | 63%; 42.74 ( $p=0.0003$ )   |
|                                                                                                                 | <i>without iron</i> | 19 | 2913 | 0.04 (-0.04 to 0.11)   | 54%; 39.06 ( $p=0.003$ )    |
| <b>Age</b> ( $I^2=0\%$ ; $Chi^2=1.53$ , $p=0.46$ )                                                              |                     |    |      |                        |                             |
|                                                                                                                 | <i>6m to 1y</i>     | 7  | 2192 | -0.04 (-0.12 to 0.05)  | 69%; 32.49 ( $p=0.0003$ )   |
|                                                                                                                 | <i>1y to 5y</i>     | 12 | 2332 | 0.04 (-0.04 to 0.12)   | 62%; 33.89 ( $p=0.001$ )    |
|                                                                                                                 | <i>5y to 13y</i>    | 6  | 1286 | 0.01 (-0.11 to 0.13)   | 10%; 8.93 ( $p=0.35$ )      |
| <b>Dose</b> ( $I^2=0\%$ ; $Chi^2=2.12$ , $p=0.71$ )                                                             |                     |    |      |                        |                             |
|                                                                                                                 | <i>0mg to 5mg</i>   | 4  | 966  | 0.01 (-0.12 to 0.14)   | 39%; 8.16 ( $p=0.15$ )      |
|                                                                                                                 | <i>5mg to 10mg</i>  | 2  | 306  | -0.01 (-0.23 to 0.21)  | 0%; 0.56 ( $p=0.45$ )       |
|                                                                                                                 | <i>10mg to 15mg</i> | 16 | 3452 | 0.01 (-0.06 to 0.08)   | 58%; 44.83 ( $p=0.0007$ )   |
|                                                                                                                 | <i>15mg to 20mg</i> | 4  | 364  | -0.04 (-0.24 to 0.17)  | 25%; 5.31 ( $p=0.26$ )      |
|                                                                                                                 | <i>20mg or more</i> | 3  | 1025 | 0.10 (-0.02 to 0.22)   | 83%; 23.74 ( $p<0.00001$ )  |
| <b>Duration</b> ( $I^2=52\%$ ; $Chi^2=4.20$ , $p=0.12$ )                                                        |                     |    |      |                        |                             |
|                                                                                                                 | <i>0m to 6m</i>     | 7  | 672  | 0.17 (0.01 to 0.33)    | 74%; 27.23 ( $p=0.0003$ )   |
|                                                                                                                 | <i>6m to 12m</i>    | 14 | 3738 | -0.01 (-0.08 to 0.06)  | 39%; 27.71 ( $p=0.05$ )     |
|                                                                                                                 | <i>12m or more</i>  | 7  | 1601 | 0.01 (-0.09 to 0.11)   | 61%; 23.36 ( $p=0.005$ )    |
| <b>Formulation</b> ( $I^2=0\%$ ; $Chi^2=1.38$ , $p=0.71$ )                                                      |                     |    |      |                        |                             |
|                                                                                                                 | <i>Solution</i>     | 15 | 2990 | 0.01 (-0.06 to 0.08)   | 64%; 52.48 ( $p<0.00001$ )  |
|                                                                                                                 | <i>Pill/tablet</i>  | 8  | 1605 | 0.01 (-0.09 to 0.12)   | 67%; 24.34 ( $p=0.002$ )    |
|                                                                                                                 | <i>Capsule</i>      | 4  | 989  | 0.07 (-0.06 to 0.20)   | 0%; 4.31 ( $p=0.51$ )       |
|                                                                                                                 | <i>Powder</i>       | 1  | 427  | -0.07 (-0.26 to 0.12)  | Not applicable              |
| <b>Prevalence of anaemia (RR)</b> <b>13</b> <b>4287</b> <b>1.00 (0.95 to 1.06)</b> <b>37%; 28.52 (p=0.05)</b>   |                     |    |      |                        |                             |
| <b>Iron co-supplementation</b> ( $I^2=0\%$ ; $Chi^2=0.01$ , $p=0.93$ )                                          |                     |    |      |                        |                             |
|                                                                                                                 | <i>with iron</i>    | 10 | 2755 | 1.00 (0.91 to 1.09)    | 58%; 21.20 ( $p=0.01$ )     |
|                                                                                                                 | <i>without iron</i> | 9  | 1532 | 1.00 (0.93 to 1.08)    | 0%; 7.31 ( $p=0.50$ )       |
| <b>Age</b> ( $I^2=8\%$ ; $Chi^2=2.17$ , $p=0.34$ )                                                              |                     |    |      |                        |                             |
|                                                                                                                 | <i>6m to 1y</i>     | 6  | 1726 | 1.01 (0.95 to 1.08)    | 39%; 11.43 ( $p=0.12$ )     |
|                                                                                                                 | <i>1y to 5y</i>     | 6  | 2161 | 0.99 (0.88 to 1.12)    | 50%; 14.07 ( $p=0.05$ )     |
|                                                                                                                 | <i>5y to 13y</i>    | 2  | 400  | 0.73 (0.47 to 1.12)    | 0%; 0.84 ( $p=0.66$ )       |
| <b>Dose</b> ( $I^2=68\%$ ; $Chi^2=12.56$ , $p=0.01$ )                                                           |                     |    |      |                        |                             |
|                                                                                                                 | <i>0mg to 5mg</i>   | 2  | 616  | 1.01 (0.94 to 1.09)    | 31%; 2.91 ( $p=0.23$ )      |
|                                                                                                                 | <i>5mg to 10mg</i>  | 1  | 208  | 0.94 (0.47 to 1.87)    | Not applicable              |
|                                                                                                                 | <i>10mg to 15mg</i> | 8  | 3069 | 1.01 (0.92 to 1.11)    | 15%; 13.00 ( $p=0.29$ )     |
|                                                                                                                 | <i>15mg to 20mg</i> | 1  | 181  | 0.76 (0.40 to 1.46)    | Not applicable              |
|                                                                                                                 | <i>20mg or more</i> | 1  | 213  | 0.17 (0.06 to 0.46)    | Not applicable              |
| <b>Duration</b> ( $I^2=83\%$ ; $Chi^2=11.42$ , $p=0.003$ )                                                      |                     |    |      |                        |                             |
|                                                                                                                 | <i>0m to 6m</i>     | 2  | 325  | 0.18 (0.06 to 0.48)    | 0%; 0.39 ( $p=0.53$ )       |
|                                                                                                                 | <i>6m to 12m</i>    | 7  | 1989 | 1.01 (0.94 to 1.08)    | 40%; 13.33 ( $p=0.10$ )     |
|                                                                                                                 | <i>12m or more</i>  | 5  | 1973 | 1.00 (0.90 to 1.12)    | 0%; 3.38 ( $p=0.85$ )       |
| <b>Formulation</b> ( $I^2=7\%$ ; $Chi^2=3.21$ , $p=0.36$ )                                                      |                     |    |      |                        |                             |
|                                                                                                                 | <i>Solution</i>     | 4  | 1115 | 0.90 (0.78 to 1.04)    | 73%; 18.87 ( $p=0.002$ )    |
|                                                                                                                 | <i>Pill/tablet</i>  | 6  | 1958 | 1.02 (0.95 to 1.10)    | 0%; 3.36 ( $p=0.85$ )       |
|                                                                                                                 | <i>Capsule</i>      | 2  | 886  | 1.00 (0.88 to 1.13)    | 3%; 3.08 ( $p=0.38$ )       |
|                                                                                                                 | <i>Powder</i>       | 1  | 328  | 1.19 (0.81 to 1.73)    | Not applicable              |
| <b>Plasma ferritin (SMD)</b> <b>19</b> <b>4474</b> <b>0.07 (0.00 to 0.13)</b> <b>95%; 480.50 (p&lt;0.00001)</b> |                     |    |      |                        |                             |
| <b>Iron co-supplementation</b> ( $I^2=91\%$ ; $Chi^2=11.08$ , $p=0.0009$ )                                      |                     |    |      |                        |                             |
|                                                                                                                 | <i>with iron</i>    | 14 | 2765 | -0.05 (-0.13 to 0.02)  | 80%; 64.00 ( $p<0.00001$ )  |
|                                                                                                                 | <i>without iron</i> | 11 | 1709 | -0.27 (-0.38 to 0.17)  | 97%; 389.92 ( $p<0.00001$ ) |
| <b>Age</b> ( $I^2=0\%$ ; $Chi^2=1.02$ , $p=0.60$ )                                                              |                     |    |      |                        |                             |
|                                                                                                                 | <i>6m to 1y</i>     | 4  | 1166 | -0.14 (-0.26 to 0.03)  | 20%; 6.26 ( $p=0.28$ )      |
|                                                                                                                 | <i>1y to 5y</i>     | 9  | 2716 | -0.16 (-0.24 to 0.08)  | 98%; 439.66 ( $p<0.00001$ ) |
|                                                                                                                 | <i>5y to 13y</i>    | 5  | 534  | -0.05 (-0.24 to 0.15)  | 47%; 11.30 ( $p=0.08$ )     |
| <b>Dose</b> ( $I^2=79\%$ ; $Chi^2=18.71$ , $p=0.0009$ )                                                         |                     |    |      |                        |                             |
|                                                                                                                 | <i>0mg to 5mg</i>   | 3  | 371  | -0.07 (-0.28 to 0.14)  | 29%; 4.21 ( $p=0.24$ )      |
|                                                                                                                 | <i>5mg to 10mg</i>  | 1  | 78   | -0.15 (-0.63 to 0.34)  | Not applicable              |
|                                                                                                                 | <i>10mg to 15mg</i> | 11 | 3171 | -0.20 (-0.28 to -0.13) | 97%; 428.29 ( $p<0.00001$ ) |
|                                                                                                                 | <i>15mg to 20mg</i> | 3  | 314  | -0.14 (-0.36 to 0.08)  | 0%; 2.05 ( $p=0.56$ )       |
|                                                                                                                 | <i>20mg or more</i> | 3  | 652  | 0.17 (0.02 to 0.33)    | 79%; 14.57 ( $p=0.002$ )    |
| <b>Duration</b> ( $I^2=92\%$ ; $Chi^2=26.28$ , $p<0.00001$ )                                                    |                     |    |      |                        |                             |
|                                                                                                                 | <i>0m to 6m</i>     | 7  | 902  | 0.06 (-0.07 to 0.20)   | 79%; 32.68 ( $p<0.0001$ )   |
|                                                                                                                 | <i>6m to 12m</i>    | 7  | 1735 | -0.07 (-0.17 to 0.03)  | 28%; 12.55 ( $p=0.18$ )     |
|                                                                                                                 | <i>12m or more</i>  | 4  | 1779 | -0.34 (-0.45 to 0.24)  | 99%; 386.75 ( $p<0.00001$ ) |
| <b>Formulation</b> ( $I^2=92\%$ ; $Chi^2=35.34$ , $p<0.00001$ )                                                 |                     |    |      |                        |                             |
|                                                                                                                 | <i>Solution</i>     | 10 | 2043 | 0.01 (-0.08 to 0.10)   | 62%; 34.20 ( $p=0.001$ )    |
|                                                                                                                 | <i>Pill/tablet</i>  | 3  | 1070 | -0.16 (-0.29 to -0.04) | 89%; 17.89 ( $p=0.0001$ )   |

|                                                                                           |                     |   |      |                        |                         |
|-------------------------------------------------------------------------------------------|---------------------|---|------|------------------------|-------------------------|
|                                                                                           | <i>Capsule</i>      | 3 | 939  | -0.54 (-0.69 to -0.38) | 99%; 364.74 (p<0.00001) |
|                                                                                           | <i>Powder</i>       | 1 | 317  | -0.18 (-0.40 to 0.04)  | Not applicable          |
| <b>Prevalence of iron deficiency (RR) 10 3149 0.99 (0.89 to 1.10) 15%; 16.44 (p=0.29)</b> |                     |   |      |                        |                         |
| <i>Iron co-supplementation (I<sup>2</sup>=0%; Chi<sup>2</sup>=0.51, p=0.48)</i>           |                     |   |      |                        |                         |
|                                                                                           | <i>with iron</i>    | 9 | 2301 | 1.02 (0.89 to 1.17)    | 47%; 15.03 (p=0.06)     |
|                                                                                           | <i>without iron</i> | 6 | 947  | 0.94 (0.79 to 1.11)    | 0%; 0.90 (p=0.97)       |
| <i>Age (I<sup>2</sup>=44%; Chi<sup>2</sup>=3.56, p=0.17)</i>                              |                     |   |      |                        |                         |
|                                                                                           | <i>6m to 1y</i>     | 3 | 905  | 0.92 (0.82 to 1.05)    | 25%; 5.34 (p=0.25)      |
|                                                                                           | <i>1y to 5y</i>     | 4 | 1992 | 1.16 (0.94 to 1.44)    | 13%; 5.75 (p=0.33)      |
|                                                                                           | <i>5y to 13y</i>    | 2 | 351  | 1.12 (0.61 to 2.04)    | 0%; 1.80 (p=0.62)       |
| <i>Dose (I<sup>2</sup>=49%; Chi<sup>2</sup>=5.86, p=0.12)</i>                             |                     |   |      |                        |                         |
|                                                                                           | <i>0mg to 5mg</i>   | 1 | 144  | 0.78 (0.61 to 1.00)    | Not applicable          |
|                                                                                           | <i>10mg to 15mg</i> | 6 | 2634 | 1.03 (0.91 to 1.16)    | 14%; 10.42 (p=0.32)     |
|                                                                                           | <i>15mg to 20mg</i> | 1 | 194  | 1.07 (0.52 to 2.18)    | Not applicable          |
|                                                                                           | <i>20mg or more</i> | 2 | 276  | 2.16 (0.72 to 6.44)    | 0%; 0.15 (p=0.93)       |
| <i>Duration (I<sup>2</sup>=52%; Chi<sup>2</sup>=4.12, p=0.13)</i>                         |                     |   |      |                        |                         |
|                                                                                           | <i>0m to 6m</i>     | 2 | 276  | 2.16 (0.72 to 6.44)    | 0%; 0.15 (p=0.93)       |
|                                                                                           | <i>6m to 12m</i>    | 3 | 981  | 0.88 (0.73 to 1.05)    | 22%; 5.13 (p=0.27)      |
|                                                                                           | <i>12m or more</i>  | 4 | 1991 | 1.04 (0.91 to 1.18)    | 15%; 7.04 (p=0.32)      |
| <i>Formulation (I<sup>2</sup>=0%; Chi<sup>2</sup>=1.87, p=0.39)</i>                       |                     |   |      |                        |                         |
|                                                                                           | <i>Solution</i>     | 4 | 1163 | 0.90 (0.75 to 1.08)    | 18%; 7.31 (p=0.29)      |
|                                                                                           | <i>Pill/tablet</i>  | 3 | 1199 | 1.05 (0.91 to 1.20)    | 51%; 6.17 (p=0.10)      |
|                                                                                           | <i>Capsule</i>      | 2 | 886  | 0.88 (0.56 to 1.37)    | 0%; 1.09 (p=0.78)       |
| <b>Plasma copper (SMD) 11 3071 -0.22 (-0.29 to 0.14) 68%; 37.47 (p=0.0002)</b>            |                     |   |      |                        |                         |
| <i>Iron co-supplementation (I<sup>2</sup>=64.1%; Chi<sup>2</sup>=2.71, p=0.09)</i>        |                     |   |      |                        |                         |
|                                                                                           | <i>with iron</i>    | 4 | 650  | -0.10 (-0.25 to 0.05)  | 0%; 2.45 (p=0.49)       |
|                                                                                           | <i>without iron</i> | 9 | 2421 | -0.25 (-0.33 to -0.17) | 75%; 32.34 (p<0.00001)  |
| <i>Age (I<sup>2</sup>=71%; Chi<sup>2</sup>=3.46, p=0.06)</i>                              |                     |   |      |                        |                         |
|                                                                                           | <i>6m to 1y</i>     | 3 | 865  | -0.11 (-0.24 to 0.02)  | 0%; 1.27 (p=0.87)       |
|                                                                                           | <i>5y to 13y</i>    | 8 | 2206 | -0.26 (-0.35 to -0.17) | 79%; 32.74 (p<0.00001)  |
| <i>Dose (I<sup>2</sup>=90%; Chi<sup>2</sup>=29.23, p&lt;0.00001)</i>                      |                     |   |      |                        |                         |
|                                                                                           | <i>0mg to 5mg</i>   | 3 | 410  | -0.08 (-0.27 to 0.12)  | 25%; 4.00 (p=0.26)      |
|                                                                                           | <i>5mg to 10mg</i>  | 2 | 519  | -0.31 (-0.49 to -0.13) | 75%; 3.98 (p=0.05)      |
|                                                                                           | <i>10mg to 15mg</i> | 7 | 1310 | -0.01 (-0.12 to 0.10)  | 0%; 5.40 (p=0.61)       |
|                                                                                           | <i>20mg or more</i> | 1 | 930  | -0.46 (-0.59 to -0.33) | Not applicable          |
| <i>Duration (I<sup>2</sup>=94%; Chi<sup>2</sup>=30.84, p&lt;0.00001)</i>                  |                     |   |      |                        |                         |
|                                                                                           | <i>0m to 6m</i>     | 2 | 1355 | -0.44 (-0.55 to -0.33) | 0%; 0.17 (p=0.68)       |
|                                                                                           | <i>6m to 12m</i>    | 5 | 1168 | -0.08 (-0.20 to 0.04)  | 0%; 3.23 (p=0.78)       |
|                                                                                           | <i>12m or more</i>  | 4 | 548  | 0.06 (-0.11 to 0.24)   | 7%; 3.23 (p=0.36)       |
| <i>Formulation (I<sup>2</sup>=95%; Chi<sup>2</sup>=20.76, p&lt;0.00001)</i>               |                     |   |      |                        |                         |
|                                                                                           | <i>Solution</i>     | 9 | 2490 | -0.37 (-0.46 to -0.29) | 97%; 370.26 (p<0.00001) |
|                                                                                           | <i>Pill/tablet</i>  | 3 | 439  | -0.83 (-1.01 to -0.65) | 99%; 277.02 (p<0.00001) |

## Appendix 7: Additional forest plots

## Incidence of lower respiratory tract infection

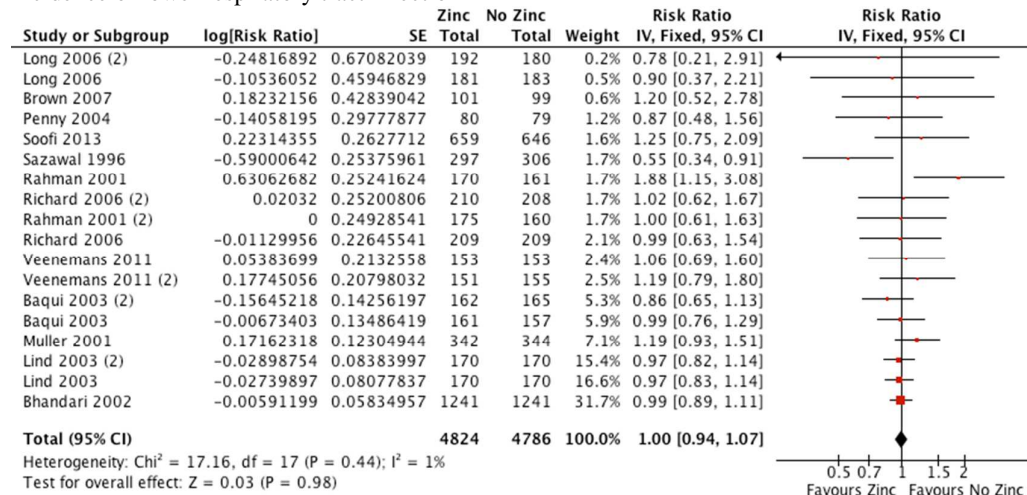

## Incidence of malaria

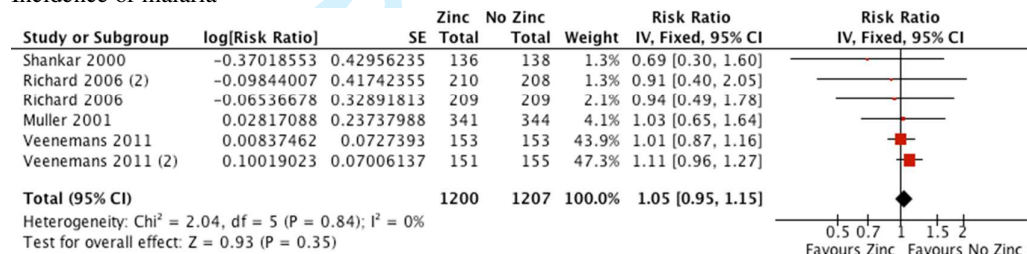Participants with  $\geq 1$  vomiting episode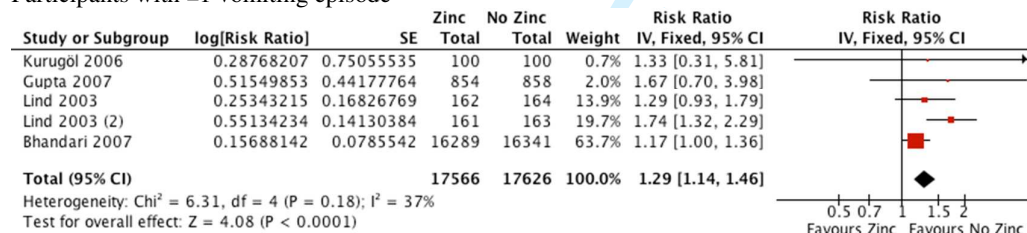



Plasma zinc

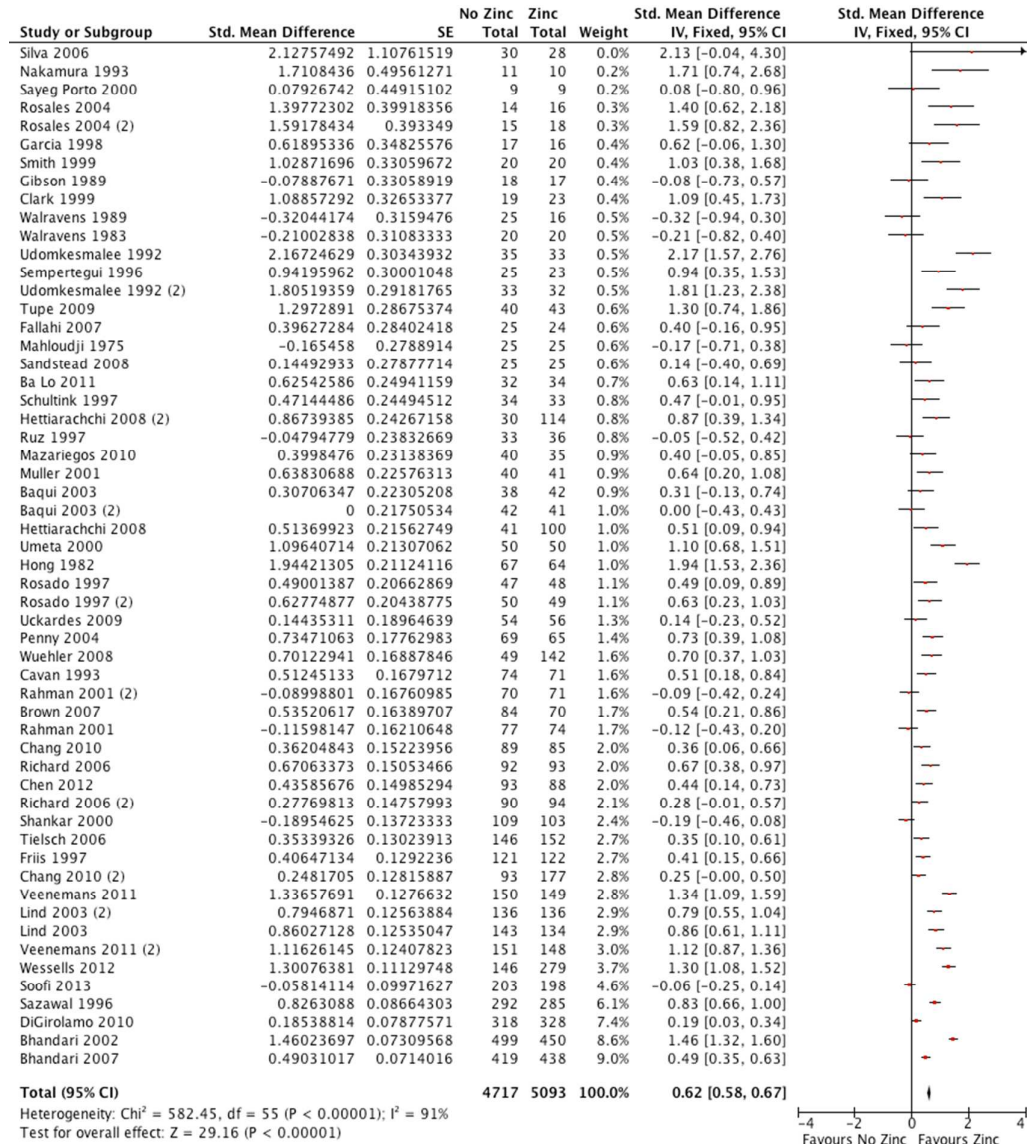

1  
2  
3  
4  
5  
6  
7  
8  
9  
10  
11  
12  
13  
14  
15  
16  
17  
18  
19  
20  
21  
22  
23  
24  
25  
26  
27  
28  
29  
30  
31  
32  
33  
34  
35  
36  
37  
38  
39  
40  
41  
42  
43  
44  
45  
46  
47  
48  
49  
50  
51  
52  
53  
54  
55  
56  
57  
58  
59  
60

**Appendix 8: Tests for reporting bias**

All cause mortality funnel plot (observed and imputed studies)

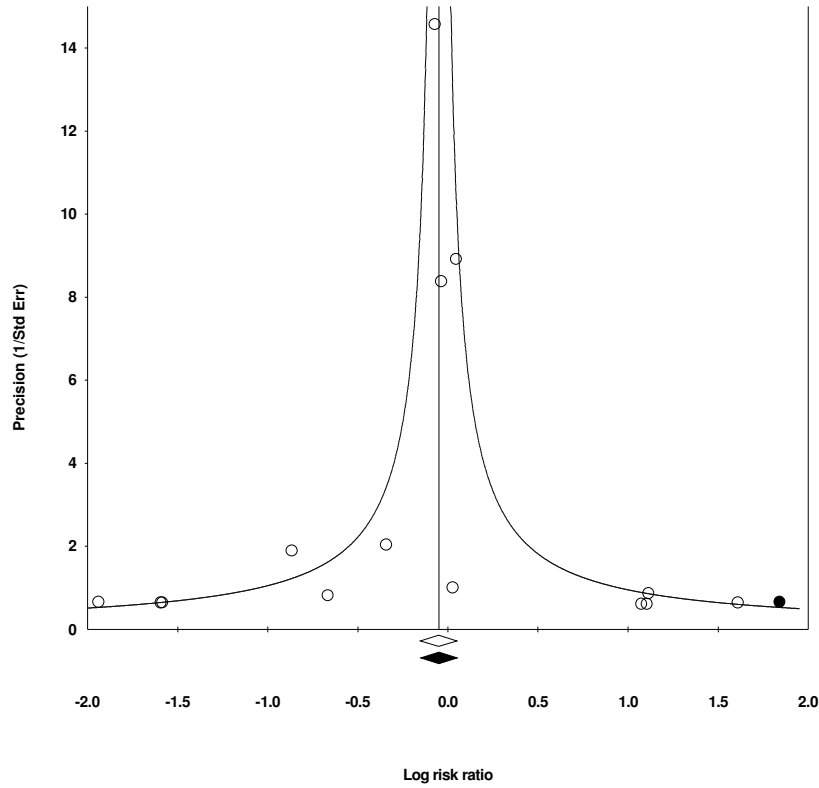

Incidence of LRTI (observed and imputed studies)

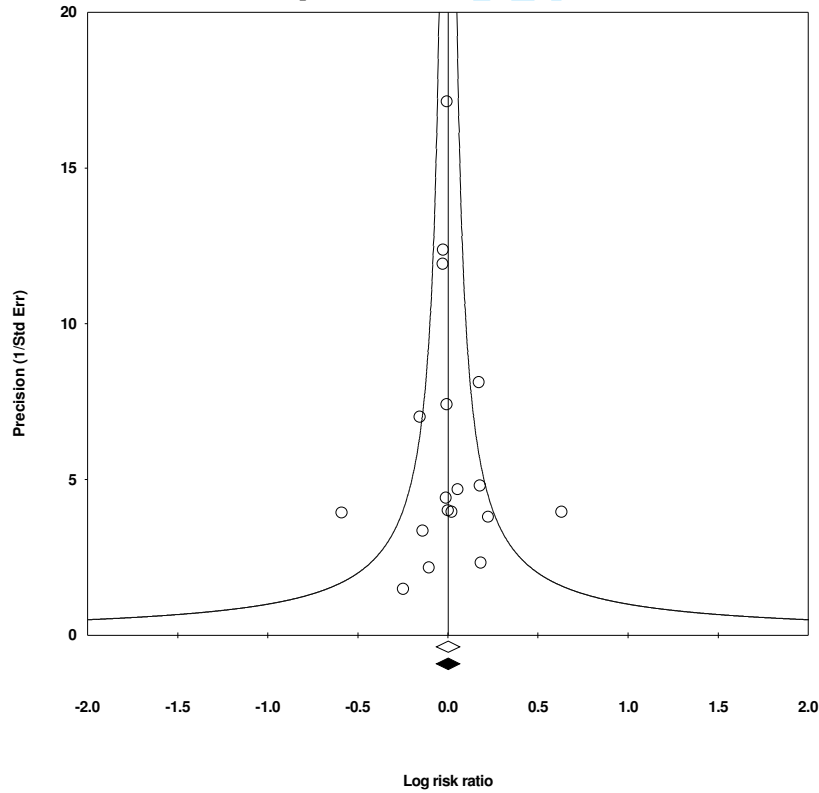

Height (observed and imputed studies)

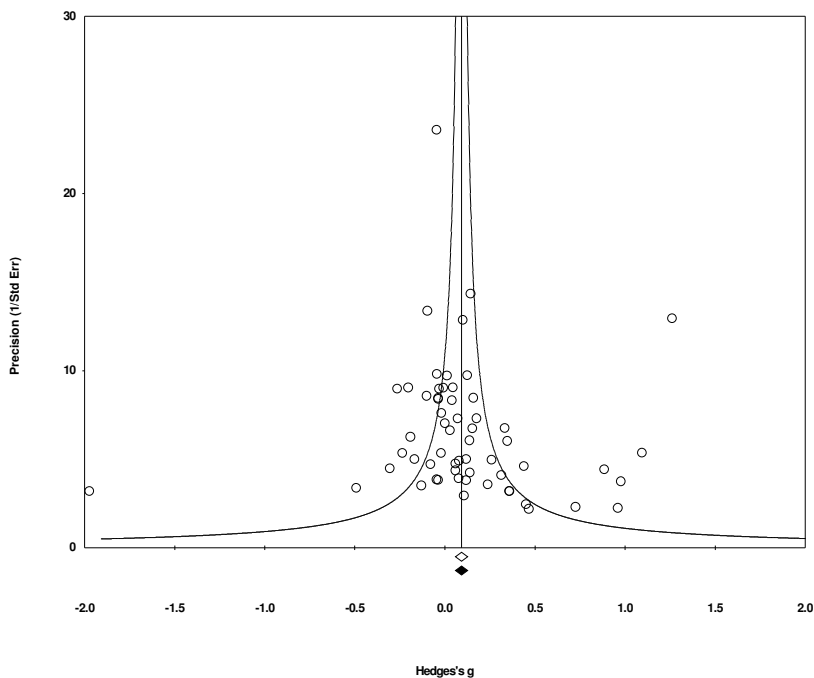

## REFERENCES

1. Ahmed T, Svennerholm AM, Al Tarique A, Sultana GN, Qadri F. Enhanced immunogenicity of an oral inactivated cholera vaccine in infants in Bangladesh obtained by zinc supplementation and by temporary withholding breast-feeding. *Vaccine*. 2009; **27**(9): 1433-9.
2. Bates CJ, Evans PH, Dardenne M, Prentice A, Lunn PG, Northrop-Clewes CA, et al. A trial of zinc supplementation in young rural Gambian children. *British Journal of Nutrition*. 1993; **69**(1): 243-55.
3. Behrens RH, Tomkins AM, Roy SK. Zinc supplementation during diarrhoea, a fortification against malnutrition? *Lancet*. 1990; **336**(18): 442-3.
4. Berger J, Ninh NX, Khan NC, Nhien NV, Lien DK, Trung NQ, et al. Efficacy of combined iron and zinc supplementation on micronutrient status and growth in Vietnamese infants. *European Journal of Clinical Nutrition*. 2006; **60**(4): 443-54.
5. Dijkhuizen MA, Winichagoon P, Wieringa FT, Wasantwisut E, Utomo B, Ninh NX, et al. Zinc supplementation improved length growth only in anemic infants in a multi-country trial of iron and zinc supplementation in South-East Asia. *Journal of Nutrition*. 2008; **138**(10): 1969-75.
6. Wieringa FT, Berger J, Dijkhuizen MA, Hidayat A, Ninh NX, Utomo B, et al. Combined iron and zinc supplementation in infants improved iron and zinc status, but interactions reduced efficacy in a multicountry trial in Southeast Asia. *Journal of Nutrition*. 2007; **137**(2): 466-71.
7. Brooks WA, Santosham M, Naheed A, Goswami D, Wahed MA, Diener-West M, et al. Effect of weekly zinc supplements on incidence of pneumonia and diarrhoea in children younger than 2 years in an urban, low-income population in Bangladesh: Randomised controlled trial. *Lancet*. 2005; **366**(9490): 999-1004.
8. Campos Junior D, Veras Neto MC, Silva Filho VL, Leite MF, Holanda MBS, Cunha NF. Zinc supplementation may recover taste for salt meals. *Jornal de Pediatria*. 2004; **80**(1): 55-9.
9. Cuevas LE, Almeida LMD, Mazunder P, Paixao AC, Silva AM, Maciel L, et al. Effect of zinc on the tuberculin response of children exposed to adults with smear-positive tuberculosis. *Annals of Tropical Paediatrics*. 2002; **22**(4): 313-9.
10. Duggan C, Penny ME, Hibberd P, Gil A, Huapaya A, Cooper A, et al. Oligofructose-supplemented infant cereal: 2 randomized, blinded, community-based trials in Peruvian infants. *The American journal of clinical nutrition*. 2003; **77**(4): 937-42.
11. Fahmida U, Rumawas JSP, Utomo B, Patmonodewo S, Schultink W. Zinc-iron, but not zinc-alone supplementation, increased linear growth of stunted infants with low haemoglobin. *Asia Pacific Journal of Clinical Nutrition*. 2007; **16**(2): 301-9.
12. Hashemipour M, Kelishadi R, Shapouri J. Effect of zinc supplementation on insulin resistance and components of the metabolic syndrome in prepubescent obese children. *Pediatric Diabetes*. 2009; **10**: 94.
13. Hashemipour M, Kelishadi R, Shapouri J, Sarrafzadegan N, Amini M, Tavakoli N, et al. Effect of zinc supplementation on insulin resistance and components of the metabolic syndrome in prepubertal obese children. *Hormones*. 2009; **8**(4): 279-85.
14. Kelishadi R, Hashemipour M, Adeli K, Tavakoli N, Movahedian-Attar A, Shapouri J, et al. Effect of zinc supplementation on markers of insulin resistance, oxidative stress, and inflammation among prepubescent children with metabolic syndrome. *Metab*. 2010; **8**(6): 505-10.
15. Heinig MJ, Brown KH, Lonnerdal B, Dewey KG. Zinc supplementation does not affect growth, morbidity, or motor development of US term breastfed infants at 4-10 mo of age. *American Journal of Clinical Nutrition*. 2006; **84**(3): 594-601.
16. Heinig MJ, Brown KH, Lonnerdal B, Dewey KG. Zinc supplementation does not affect growth, morbidity, or motor development of U.S. breastfed infants at 4-10 mo. *FASEB Journal*. 1998; **12**(A970): Abstract 5617.
17. Hess SY, Bado L, Aaron GJ, Ouedraogo JB, Zeilani M, Brown KH. Acceptability of zinc-fortified, lipid-based nutrient supplements (LNS) prepared for young children in Burkina Faso. *Maternal and Child Nutrition*. 2011; **7**(4): 357-67.

- 1 18. Imamoglu S, Bereket A, Turan S, Taga Y, Haklar G. Effect of zinc supplementation on  
2 growth hormone secretion, IGF-I, IGFBP-3, somatomedin generation, alkaline phosphatase,  
3 osteocalcin and growth in prepubertal children with idiopathic short stature. *J Pediatr*  
4 *Endocrinol.* 2005; **18**(1): 69-74.
- 5 19. Rosado JL, Lopez P, Kordas K, Garcia-Vargas G, Ronquillo D, Alatorre J, et al. Iron  
6 and/or zinc supplementation did not reduce blood lead concentrations in children in a  
7 randomized, placebo-controlled trial. *Journal of Nutrition.* 2006; **136**(9): 2378-83.
- 8 20. Rico JA, Kordas K, Lopez P, Rosado JL, Garcia Vargas G, Ronquillo D, et al. Efficacy  
9 of iron and/or zinc supplementation on cognitive performance of lead-exposed Mexican  
10 schoolchildren: a randomized, placebo-controlled trial. *Pediatrics.* 2006; **117**(3): e518-e27.
- 11 21. Kordas K, Stoltzfus RJ, Lopez P, Alatorre Rico J, Rosado JL. Iron and zinc  
12 supplementation does not improve parent or teacher ratings of behavior in first grade  
13 Mexican children exposed to lead. *Journal of Pediatrics.* 2005; **147**(5): 632-9.
- 14 22. NCT01472211. Water-based Zinc Intervention Trial in Zinc Deficient Children. 2012.
- 15 23. Osendarp SJM, Santosham M, Black RE, Wahed MA, Raaij JMAv, Fuchs GJ. Effect  
16 of zinc supplementation between 1 and 6 mo of life on growth and morbidity of Bangladeshi  
17 infants in urban slums. *American Journal of Clinical Nutrition.* 2002; **76**(6): 1401-8.
- 18 24. Payne-Robinson HM, Golden MH, Golden BE, Simeon DT. The zinc sandwich and  
19 growth. *Lancet.* 1991; **337**(8746): 925-6.
- 20 25. Perrone L, Salerno M, Gialanella G, Feng SL, Moro R, Di Lascio R, et al. Long-term  
21 zinc and iron supplementation in children of short stature: effect of growth and on trace  
22 element content in tissues. *Journal of Trace Elements in Medicine & Biology.* 1999; **13**(1-2):  
23 51-6.
- 24 26. Ronaghy H, Fox MR, Garnsm, Israel H, Harp A, Moe PG, et al. Controlled zinc  
25 supplementation for malnourished school boys: a pilot experiment. *American Journal of*  
26 *Clinical Nutrition.* 1969; **22**(10): 1279-89.
- 27 27. Ronaghy HA, Reinhold JG, Mahloudji M, Ghavami P, Fox MR, Halsted JA. Zinc  
28 supplementation of malnourished schoolboys in Iran: increased growth and other effects.  
29 *American Journal of Clinical Nutrition.* 1974; **27**(2): 112-21.
- 30 28. Roxas BV, Intengan CL, Juliano BO. Effect of zinc supplementation and high-protein  
31 rice on the growth of preschool children on a rice-based diet. *Qualitas Plantarum.* 1980;  
32 **30**(3/4): 213-22.
- 33 29. Shingwekar AG, Mohanram M, Reddy V. Effect of zinc supplementation on plasma  
34 levels of vitamin A and retinol-binding protein in malnourished children. *Clinica Chimica*  
35 *Acta.* 1979; **93**(1): 97-100.
- 36 30. Shrivastava SP, Roy AK, Jana UK. Zinc supplementation in protein energy  
37 malnutrition. *Indian Pediatrics.* 1993; **30**(6): 779-82.
- 38 31. Walravens PA, Chakar A, Mokni R, Denise J, Lemonnier D. Zinc supplements in  
39 breastfed infants. *Lancet.* 1992; **340**(8821): 683-5.
- 40 32. Wasantwisut E, Winichagoon P, Chitchumroonchokchai C, Yamborisut U,  
41 Boonpradern A, Pongcharoen T, et al. Iron and zinc supplementation improved iron and  
42 zinc status, but not physical growth, of apparently healthy, breast-fed infants in rural  
43 communities of northeast Thailand. *Journal of Nutrition.* 2006; **136**(9): 2405-11.
- 44 33. Yanfeng X, Ling W, Jing Y, Rong Z. The effect of status of zinc, calcium on growth of  
45 children aged 3~6 years in Xi'an and analysis of effectiveness of zinc supplement. *Journal of*  
46 *Xi'an Medical University, English Edition.* 1997; **9**(1): 48-51.
- 47 34. Zeba AN, Sorgho H, Rouamba N, Zongo I, Rouamba J, Guiguemde RT, et al. Major  
48 reduction of malaria morbidity with combined vitamin A and zinc supplementation in young  
49 children in Burkina Faso: a randomized double blind trial. *Nutrition Journal.* 2008; **7**: 7.
- 50 35. Arabaci FI, Kaya A, Gultekin A, Icasoglu FD, Mutlu EC. Comparison of efficacies  
51 of divalent, trivalent irons and divalent iron plus zinc preparations in paediatric patients with  
52 iron deficiency anemia. *Turkiye Klinikleri Pediatri.* 2010; **19**(3): 210-5.
- 53 36. Chicourel EZ. Efeito Da Suplementação No Desenvolvimento Físico E Cognitivo De  
54 Pré-Escolares. São Paulo, Brazil: Universidade de São Paulo; 2001.
- 55 37. CTRI/2010/091/001417. A clinical trial to study the effect of zinc sulfate in reducing  
56 the incidence of diarrhea, acute respiratory tract infections and in promoting growth in  
57 infants of 6-11 months of age.
- 58
- 59
- 60

- 1 38. Jimenez R, Sagaro E, Lafita Y. How growth infants supplemented with zinc sulfate  
2 after an episode of persistent diarrhea. *Journal of Pediatric Gastroenterology & Nutrition*;  
3 2000. p. S26.
- 4 39. Mitter SS, Havt A, Moore SR, Mota RM, Oria RB, Guerrant RL, et al. Zinc  
5 supplementation exposes associations between the interleukin 8 (-251 A/T) polymorphism  
6 and markers for higher intestinal inflammation in children from Northeast Brazil. *American*  
7 *Journal of Tropical Medicine and Hygiene*. 2009; **1**): 23-4.
- 8 40. NCT00133406. Long-term impact and intervention for diarrhea in Brazil.
- 9 41. NCT00228254. Vitamin A and zinc: prevention of pneumonia (VAZPOP) study.
- 10 42. NCT00374023. A Study on Immunological Effect of Vitamin A and Zinc in a Placebo  
11 Controlled 4 Cell Trial.
- 12 43. NCT00421668. A Trial of Zinc and Micronutrients in Tanzanian Children.
- 13 44. NCT00589264. Zinc and biobehavioral development in early childhood.
- 14 45. NCT00944359. Impact of preventive and therapeutic zinc supplementation programs  
15 among young children.
- 16 46. NCT00967551. Micronutrient Sprinkles in a Daycare Center.
- 17 47. NCT00980421. Safety of various mode of delivery of iron supplement on iron toxicity  
18 markers in preschool children.
- 19 48. NCT01306097. Zinc Supplementation and Severe and Recurrent Diarrhea.
- 20 49. NCT01616693. Zinc and/or Probiotic Supplementation of Rotavirus and Oral Polio  
21 Virus Vaccines.
- 22 50. Smith RM, King RA, Spargo RM, Cheek DB, Field JB, Veitch LG. Growth-retarded  
23 Aboriginal children with low plasma zinc levels do not show a growth response to  
24 supplementary zinc. *Lancet*. 1985; **i**(8434): 923-4.
- 25 51. Ahmed T, Arifuzzaman M, Lebens M, Qadri F, Lundgren A. CD4+ T-cell responses to  
26 an oral inactivated cholera vaccine in young children in a cholera endemic country and the  
27 enhancing effect of zinc supplementation. *Vaccine*. 2009; **28**(2): 422-9.
- 28 52. Akramuzzaman SM, Mahalanabis D, Mitra AK, Rahman MM. Effect of long-term  
29 supplementation of zinc in undernourished young children of a poor periurban community in  
30 Bangladesh [abstract]. *J-Gastroenterol-Hepatol*; 1994. p. A132.
- 31 53. Alarcon K, Kolsteren PW, Prada AM, Chian AM, Velarde RE, Pecho IL, et al. Effects  
32 of separate delivery of zinc or zinc and vitamin A on hemoglobin response, growth, and  
33 diarrhea in young Peruvian children receiving iron therapy for anemia. *American Journal of*  
34 *Clinical Nutrition*. 2004; **80**(5): 1276-82.
- 35 54. Albert MJ, Qadri F, Wahed MA, Ahmed T, Rahman AS, Ahmed F, et al.  
36 Supplementation with zinc, but not vitamin A, improves seroconversion to vibriocidal  
37 antibody in children given an oral cholera vaccine. *The Journal of infectious diseases*; 2003.  
38 p. 909-13.
- 39 55. Qadri F, Ahmed T, Wahed MA, Ahmed F, Bhuiyan NA, Rahman AS, et al.  
40 Suppressive effect of zinc on antibody response to cholera toxin in children given the killed,  
41 B subunit-whole cell, oral cholera vaccine. *Vaccine*; 2004. p. 416-21.
- 42 56. Ba Lo N, Aaron GJ, Hess SY, Dossou NI, Guiro AT, Wade S, et al. Plasma zinc  
43 concentration responds to short-term zinc supplementation, but not zinc fortification, in  
44 young children in Senegal. *American Journal of Clinical Nutrition*. 2011; **93**(6): 1348-55.
- 45 57. Baqui AH, Zaman K, Persson LA, El Arifeen S, Yunus M, Begum N, et al.  
46 Simultaneous Weekly Supplementation of Iron and Zinc Is Associated with Lower  
47 Morbidity Due to Diarrhea and Acute Lower Respiratory Infection in Bangladeshi Infants.  
48 *Journal of Nutrition*. 2003; **133**(12): 4150-7.
- 49 58. Baqui AH, Walker CL, Zaman K, El Arifeen S, Chowdhury HR, Wahed MA, et al.  
50 Weekly iron supplementation does not block increases in serum zinc due to weekly zinc  
51 supplementation in Bangladeshi infants. *The Journal of nutrition*; 2005. p. 2187-91.
- 52 59. Black MM, Baqui AH, Zaman K, Ake Persson L, El Arifeen S, Le K, et al. Iron and  
53 zinc supplementation promote motor development and exploratory behavior among  
54 Bangladeshi infants. *The American journal of clinical nutrition*; 2004. p. 903-10.
- 55 60. Fischer Walker CL, Baqui AH, Ahmed S, Zaman K, El Arifeen S, Begum N, et al.  
56 Low-dose weekly supplementation of iron and/or zinc does not affect growth among  
57 Bangladeshi infants. *European Journal of Clinical Nutrition*. 2009; **63**(1): 87-92.
- 58  
59  
60

- 1 61. Bhandari N, Bahl R, Taneja S, Strand T, Molbak K, Ulvik RJ, et al. Substantial  
2 reduction in severe diarrheal morbidity by daily zinc supplementation in young north Indian  
3 children. *Pediatrics*. 2002; **109**(6): e86.
- 4 62. Bhandari N, Bahl R, Taneja S, Strand T, Molbak K, Ulvik RJ, et al. Effect of routine  
5 zinc supplementation on pneumonia in children aged 6 months to 3 years: Randomised  
6 controlled trial in an urban slum. *British Medical Journal*. 2002; **324**(7350): 1358-61.
- 7 63. Manger MS, Strand TA, Taneja S, Refsum H, Ueland PM, Nygard O, et al. Cobalamin  
8 status modifies the effect of zinc supplementation on the incidence of prolonged diarrhea in  
9 6- to 30-month-old North Indian children. *Journal of Nutrition*. 2011; **141**(6): 1108-13.
- 10 64. Manger MS, Taneja S, Strand TA, Ueland PM, Refsum H, Schneede J, et al. Poor  
11 folate status predicts persistent diarrhea in 6- to 30-month-old north Indian children. *The*  
12 *Journal of nutrition*; 2011. p. 2226-32.
- 13 65. Taneja S, Strand TA, Sommerfelt H, Rajiv B, Nita B. Zinc supplementation for four  
14 months does not affect growth in young north Indian children. *Journal of Nutrition*. 2010;  
15 **140**(3): 630-4.
- 16 66. Taneja S, Bhandari N, Bahl R, Bhan MK. Impact of zinc supplementation on mental  
17 and psychomotor scores of children aged 12 to 18 months: a randomized, double-blind trial.  
18 *Journal of Pediatrics*. 2005; **146**(4): 506-11.
- 19 67. Taneja S, Bhandari N, Strand TA, Sommerfelt H, Refsum H, Ueland PM, et al.  
20 Cobalamin and folate status in infants and young children in a low-to-middle income  
21 community in India. *The American journal of clinical nutrition*. 2007; **86**(5): 1302-9.
- 22 68. Bhan G, Bhandari N, Taneja S, Mazumder S, Bahl R. The effect of maternal education  
23 on gender bias in care-seeking for common childhood illnesses. *Social Science & Medicine*.  
24 2005; **60**(4): 715-24.
- 25 69. Bhandari N, Taneja S, Mazumder S, Bahl R, Fontaine O, Bhan MK, et al. Adding zinc  
26 to supplemental iron and folic acid does not affect mortality and severe morbidity in young  
27 children. *Journal of Nutrition*. 2007; **137**(1): 112-7.
- 28 70. Arsenault JE. Dietary zinc intake of young children in Peru and the United States, and  
29 effects of supplemental zinc on energy intake, appetite, body composition, and plasma leptin,  
30 ghrelin, and insulin concentrations of Peruvian infants [3230603]. United States --  
31 California: University of California, Davis; 2006.
- 32 71. Arsenault JE, De Romana DL, Penny ME, Van Loan MD, Brown KH. Additional zinc  
33 delivered in a liquid supplement, but not in a fortified porridge, increased fat-free mass  
34 accrual among young Peruvian children with mild-to-moderate stunting. *Journal of*  
35 *Nutrition*. 2008; **138**(1): 108-14.
- 36 72. Arsenault JE, Havel PJ, De Romana DL, Penny ME, Van Loan MD, Brown KH.  
37 Longitudinal measures of circulating leptin and ghrelin concentrations are associated with  
38 the growth of young Peruvian children but are not affected by zinc supplementation.  
39 *American Journal of Clinical Nutrition*. 2007; **86**(4): 1111-9.
- 40 73. Brown KH, De Romana DL, Arsenault JE, Peerson JM, Penny ME. Comparison of the  
41 effects of zinc delivered in a fortified food or a liquid supplement on the growth, morbidity,  
42 and plasma zinc concentrations of young Peruvian children. *American Journal of Clinical*  
43 *Nutrition*. 2007; **85**(2): 538-47.
- 44 74. Castillo-Duran C, Garcia H, Venegas P, Torrealba I, Panteon E, Concha N, et al. Zinc  
45 supplementation increases growth velocity of male children and adolescents with short  
46 stature. *Acta Paediatrica*. 1994; **83**(8): 833-7.
- 47 75. Castillo-Duran C, Hertrampf ED, Ruz MO, Torrejon CS, Salazar G. Controlled trial of  
48 zinc supplementation on growth and body composition in Chilean children from low income  
49 groups. *Pediatric Research*; 2002. p. 188a.
- 50 76. Cavan KR. The assessment of the zinc status of a group of school children from a peri-  
51 urban area of Guatemala City, Guatemala [NN70828]. Canada: University of Guelph  
52 (Canada); 1991.
- 53 77. Cavan KR, Gibson RS, Grazioso CF, Isalgue AM, Ruz M, Solomons NW. Growth and  
54 body composition of periurban Guatemalan children in relation to zinc status: a longitudinal  
55 zinc intervention trial. *American Journal of Clinical Nutrition*. 1993; **57**(3): 344-52.
- 56  
57  
58  
59  
60

- 1 78. Grazioso CF, Isalgue M, de Ramirez I, Ruz M, Solomons NW. The effect of zinc  
2 supplementation on parasitic reinfestation of Guatemalan schoolchildren. *American Journal*  
3 *of Clinical Nutrition*. 1993; **57**(5): 673-8.
- 4 79. Chang S, El Arifeen S, Bari S, Wahed MA, Rahman KM, Rahman MT, et al.  
5 Supplementing iron and zinc: double blind, randomized evaluation of separate or combined  
6 delivery. *European Journal of Clinical Nutrition*; 2010. p. 153-60.
- 7 80. Chen L, Liu Y-F, Gong M, Jiang W, Fan Z, Qu P, et al. Effects of vitamin A, vitamin  
8 A plus zinc, and multiple micronutrients on anemia in preschool children in Chongqing,  
9 China. *Asia Pacific Journal of Clinical Nutrition*. 2012; **21**(1): 3-11.
- 10 81. Chhagan M. The effect of micronutrient supplementation on morbidity and growth in  
11 South African children [3351928]. United States -- Massachusetts: Tufts University, Gerald  
12 J. and Dorothy R. Friedman School of Nutrition Science and Policy; 2009.
- 13 82. Chhagan MK, Van den Broeck J, Luabeya K-KA, Mpontshane N, Tomkins A, Bennish  
14 ML. Effect on longitudinal growth and anemia of zinc or multiple micronutrients added to  
15 vitamin A: a randomized controlled trial in children aged 6-24 months. *BMC Public Health*.  
16 2010; **10**: 145.
- 17 83. Chhagan MK, Van den Broeck J, Luabeya KK, Mpontshane N, Tucker KL, Bennish  
18 ML. Effect of micronutrient supplementation on diarrhoeal disease among stunted children  
19 in rural South Africa. *European Journal of Clinical Nutrition*. 2009; **63**(7): 850-7.
- 20 84. Luabeya KK, Mpontshane N, Mackay M, Ward H, Elson I, Chhagan M, et al. Zinc or  
21 multiple micronutrient supplementation to reduce diarrhea and respiratory disease in South  
22 African children: a randomized controlled trial. *PLoS ONE [Electronic Resource]*. 2007;  
23 **2**(6): e541.
- 24 85. Van den Broeck J, Mackay M, Mpontshane N, Kany Kany Luabeya A, Chhagan M,  
25 Bennish ML. Maintaining data integrity in a rural clinical trial. *Clin Trials*. 2007; **4**(5): 572-  
26 82.
- 27 86. Clark PJ, Eastell R, Barker ME. Zinc supplementation and bone growth in pubertal  
28 girls. *Lancet*. 1999; **354**(9177): 485.
- 29 87. Cole CR, Sampaio DLB, de Mattos ÂP, Ribeiro TCM, de Q. Leite ME, Costa-Ribeiro  
30 H. Suplementação de Zinco e Outros Micronutrientes Através do Uso de "Sprinkles":  
31 Impacto na Ocorrência de Doença Diarreica e Infecções Respiratórias em Crianças  
32 Institucionalizadas. 2012.
- 33 88. Dehbozorgi P, Mohseni P, Mazloom Z. The influence of zinc sulfate supplementation  
34 on the growth of school age children in villages around Shiraz 2002, 2003. *Journal of*  
35 *Medical Sciences*. 2007; **7**(4): 690-3.
- 36 89. Bui VQ, DiGirolamo AM, Stein AD, Ramakrishnan U, Ramirez-Zea M, Flores-Ayala  
37 RC, et al. No effect of 6-month zinc supplementation on anthropometric measures in 6-11  
38 year-old urban school children in Guatemala. *The FASEB Journal*. 2009; **23** (S1).
- 39 90. DiGirolamo AM, Ramirez-Zea M, Wang M, Flores-Ayala R, Martorell R, Neufeld  
40 LM, et al. Randomized trial of the effect of zinc supplementation on the mental health of  
41 school-age children in Guatemala. *American Journal of Clinical Nutrition*. 2010; **92**(5):  
42 1241-50.
- 43 91. Ebrahimi S, Pormahmodi A, Kamkar A. Study of zinc supplementation on growth of  
44 schoolchildren in Yasuj, Southwest of Iran. *Pakistan Journal of Nutrition*. 2006; **5**(4): 341-2.
- 45 92. Fallahi E, Kimiagar M, Nazari A, Hasanvand MA, Seifi M. Effect of zinc and iron  
46 supplementation on indicators of iron, zinc and vitamin A status of primary school children.  
47 *Pakistan Journal of Biological Sciences*. 2007; **10**(7): 1088-92.
- 48 93. APP. dF. Impacto antropométrico da suplementação semanal de zinco em escolares  
49 com déficit de crescimento: ensaio randomizado duplo-cego. São Paulo, Brazil:  
50 Universidade Federal de São Paulo; 2002.
- 51 94. Friis H, Ndhlovu P, Mduluzi T, Kaondera K, Sandstrom B, Michaelsen KF, et al. The  
52 impact of zinc supplementation on *Schistosoma mansoni* reinfection rate and intensities: a  
53 randomized, controlled trial among rural Zimbabwean schoolchildren. *European Journal of*  
54 *Clinical Nutrition*. 1997; **51**(1): 33-7.
- 55 95. Friis H, Ndhlovu P, Mduluzi T, Kaondera K, Sandstrom B, Michaelsen KF, et al. The  
56 impact of zinc supplementation on growth and body composition: a randomized, controlled  
57  
58  
59  
60



- 1 trial among rural Zimbabwean schoolchildren. *European Journal of Clinical Nutrition*. 1997;  
2 **51**(1): 38-45.
- 3 96. Garcia H, Ugarte F, Henriquez C, Iniquez G, Salazar T, Pizarro F, et al. Lack of effect  
4 of zinc supplementation on growth and somatotrophic axis in children with idiopathic short  
5 stature and diminished growth velocity. [Spanish] Ausencia de efecto de la suplementacion  
6 con cinc sobre el crecimiento y el eje somatotrofico en ninos con talla baja idiopatica y  
7 velocidad de crecimiento disminuida. *Endocrinologia*. 1998; **45**(5): 183-7.
- 8 97. Gibson RS, Vanderkooy PD, MacDonald AC, Goldman A, Ryan BA, Berry M. A  
9 growth-limiting, mild zinc-deficiency syndrome in some southern Ontario boys with low  
10 height percentiles. *American Journal of Clinical Nutrition*. 1989; **49**(6): 1266-73.
- 11 98. Gracia B, Plata Cd, Rueda A, Mosquera M, Suarez MF, Pradilla A. Effect of zinc  
12 supplementation on growth velocity of pre school children. *Colombia Medica*. 2005;  
13 **36**(4(Suppl. 3)): 31-40.
- 14 99. Gupta DN, Mondal SK, Ghosh S, Rajendran K, Sur D, Manna B. Impact of zinc  
15 supplementation on diarrhoeal morbidity in rural children of West Bengal, India. *Acta*  
16 *Paediatrica*. 2003; **92**(5): 531-6.
- 17 100. Gupta DN, Krishnan R, Mondal SK, Subrata G, Bhattacharya SK. Operational  
18 feasibility of implementing community-based zinc supplementation: impact on childhood  
19 diarrheal morbidity. *Pediatric Infectious Disease Journal*. 2007; **26**(4): 306-10.
- 20 101. Hambidge KM, Chavez MN, Brown RM, Walravens PA. Zinc supplementation of  
21 low-income pre-school children. *Trace element metabolism in man and animals*. 1978; **3**:  
22 296-9.
- 23 102. Hambidge KM, Krebs NF, Walravens PA. Growth velocity of young children  
24 receiving a dietary zinc supplement. *Nutrition Research*. 1985; **5**(SUPPL. 1): S-306-S-16.
- 25 103. Han J, Yang Y, Shao X, He M, Bian L, Wang Z. Effect of micronutrient  
26 supplementation on the growth of preschool children in China. *Nutritional Sciences*. 2002;  
27 **5**(3): 155-60.
- 28 104. Yang Y-X, Han J-H, Shao X-P, He M, Bian L-H, Wang Z, et al. Effect of  
29 micronutrient supplementation on the growth of preschool children in China. *Biomed*  
30 *Environ Sci*. 2002; **15**(3): 196-202.
- 31 105. Hettiarachchi M, Liyanage C, Wickremasinghe R, Hilmers DC, Abrams SA. The  
32 efficacy of micronutrient supplementation in reducing the prevalence of anaemia and  
33 deficiencies of zinc and iron among adolescents in Sri Lanka. *European Journal of Clinical*  
34 *Nutrition*. 2008; **62**(7): 856-65.
- 35 106. Hong ZY. [Observation on the therapeutic effect of zinc on underweight children].  
36 *Chung Hua I Hsueh Tsa Chih*. 1982; **62**(7): 415-9.
- 37 107. Ince E, Kemahli S, Uysal Z, Akar N, Cin S, Arcasoy A. Mild zinc deficiency in  
38 preschool children. *Journal of Trace Elements in Experimental Medicine*; 1994. p. 135-41.
- 39 108. Kartasurya MI, Ahmed F, Subagio HW, Rahfiludin MZ, Marks GC. Zinc combined  
40 with vitamin A reduces upper respiratory tract infection morbidity in a randomised trial in  
41 preschool children in Indonesia. *British Journal of Nutrition*. 2012; **108**(12): 2251-60.
- 42 109. Kikafunda JK, Walker AF, Allan EF, Tumwine JK. Effect of zinc supplementation on  
43 growth and body composition of Ugandan preschool children: a randomized, controlled,  
44 intervention trial. *American Journal of Clinical Nutrition*. 1998; **68**(6): 1261-6.
- 45 110. Sandstead HH. Improving study design. *AmJ ClinNutr*; 1999. p. 110-1.
- 46 111. Solomons NW, Ruz M, Gibson RS. Single-nutrient interventions with zinc. *The*  
47 *American journal of clinical nutrition*. 1999; **70**(1): 111-3.
- 48 112. Kurugol Z, Akilli M, Bayram N, Koturoglu G. The prophylactic and therapeutic  
49 effectiveness of zinc sulphate on common cold in children. *Acta Paediatrica*. 2006; **95**(10):  
50 1175-81.
- 51 113. Larson CP, Nasrin D, Saha A, Chowdhury MI, Qadri F. The added benefit of zinc  
52 supplementation after zinc treatment of acute childhood diarrhoea: a randomized, double-  
53 blind field trial. *Trop Med Int Health*. 2010; **15**(6): 754-61.
- 54 114. Sheikh A, Sohail S, Ahmad SM, Nasrin D, Setarun N, Alam MM, et al. Zinc influences  
55 innate immune responses in children with enterotoxigenic *Escherichia coli* induced diarrhea.  
56 *Journal of Nutrition*. 2010; **140**(5): 1049-56.
- 57  
58  
59  
60

- 1 115. Lind T. Iron and zinc in infancy: Results from experimental trials in Sweden and  
2 Indonesia [C816987]. Sweden: Umea Universitet (Sweden); 2004.
- 3 116. Lind T, Lonnerdal B, Stenlund H, Gamayanti IL, Ismail D, Seswandhana R, et al. A  
4 community-based randomized controlled trial of iron and zinc supplementation in  
5 Indonesian infants: effects on growth and development. *American Journal of Clinical  
6 Nutrition*. 2004; **80**(3): 729-36.
- 7 117. Lind T, Lonnerdal B, Stenlund H, Ismail D, Seswandhana R, Ekstrom E-C, et al. A  
8 community-based randomized controlled trial of iron and zinc supplementation in  
9 Indonesian infants: interactions between iron and zinc. *American Journal of Clinical  
10 Nutrition*. 2003; **77**(4): 883-90.
- 11 118. Lind T, Seswandhana R, Persson L-A, Lonnerdal B. Iron supplementation of iron-  
12 replete Indonesian infants is associated with reduced weight-for-age. *Acta Paediatrica*. 2008;  
13 **97**(6): 770-5.
- 14 119. Long KZ, Montoya Y, Hertzmark E, Santos JI, Rosado JL. A double-blind,  
15 randomized, clinical trial of the effect of vitamin A and zinc supplementation on diarrheal  
16 disease and respiratory tract infections in children in Mexico City, Mexico. *American  
17 Journal of Clinical Nutrition*. 2006; **83**(3): 693-700.
- 18 120. Long KZ, Rosado JL, Montoya Y, de Lourdes Solano M, Hertzmark E, DuPont HL, et  
19 al. Effect of vitamin A and zinc supplementation on gastrointestinal parasitic infections  
20 among Mexican children. *Pediatrics*. 2007; **120**(4): e846-55.
- 21 121. Rosado JL, Caamano MC, Montoya YA, de Lourdes Solano M, Santos JI, Long KZ.  
22 Interaction of zinc or vitamin A supplementation and specific parasite infections on Mexican  
23 infants' growth: a randomized clinical trial. *European Journal of Clinical Nutrition*. 2009;  
24 **63**(10): 1176-84.
- 25 122. Sanchez-Hernandez JJ, Long K, Al Mamun A, Rosado JL, Del Carmen Caamano M,  
26 Marks G. Nutritional status as a modifier of the effect of vitamin a or zinc supplementation  
27 on gastrointestinal parasite infections in Mexican children. *FASEB Journal Conference:  
28 Experimental Biology*. 2011; **20110409**(20110413).
- 29 123. Mahloudji M, Reinhold JG, Haghshenass M, Ronaghy HA, Fox MR, Halsted JA.  
30 Combined zinc and iron compared with iron supplementation of diets of 6- to 12-year old  
31 village schoolchildren in southern Iran. *American Journal of Clinical Nutrition*. 1975; **28**(7):  
32 721-5.
- 33 124. Malik A, Taneja S. Report on the trial for Effect of Short Course Prophylactic Zinc  
34 Supplementation of 2 weeks on diarrhea morbidity in Infants of 6-11 months of age. 2013.
- 35 125. Marinho HA, Shrimpton R, Giugliano R, Burini RC. Influence of enteral parasites on  
36 the blood vitamin A levels in preschool children orally supplemented with retinol and/or  
37 zinc. *European Journal of Clinical Nutrition*. 1991; **45**(11): 539-44.
- 38 126. Mazariegos M, Hambidge KM, Westcott JE, Solomons NW, Raboy V, Das A, et al.  
39 Neither a zinc supplement nor phytate-reduced maize nor their combination enhance growth  
40 of 6- to 12-month-old Guatemalan infants. *Journal of Nutrition*. 2010; **140**(5): 1041-8.
- 41 127. Meeks Gardner J, Witter M, Ramdath D. Zinc supplementation morbidity and growth  
42 in stunted Jamaican children [abstract]. *West Indian Medical Journal*; 1998. p. 28-9.
- 43 128. Meeks Gardner J, Witter MM, Ramdath DD. Zinc supplementation: effects on the  
44 growth and morbidity of undernourished Jamaican children. *European Journal of Clinical  
45 Nutrition*. 1998; **52**(1): 34-9.
- 46 129. Meeks Gardner JM, Powell CA, Baker-Henningham H, Walker SP, Cole TJ,  
47 Grantham-McGregor SM. Zinc supplementation and psychosocial stimulation: effects on the  
48 development of undernourished Jamaican children. *American Journal of Clinical Nutrition*.  
49 2005; **82**(2): 399-405.
- 50 130. Mozaffari-Khosravi H, Shakiba M, Eftekhari MH, Vahidi AR. Effects of zinc  
51 supplementation on the physical growth of 2-5 years old children. *Iranian Journal of  
52 Endocrinology and Metabolism*. 2008; **10**(4): Pe363-Pe71, En417.
- 53 131. Mozaffari-Khosravi H, Shakiba M, Eftekhari MH, Fatehi F. Effects of zinc  
54 supplementation on physical growth in 2-5-year-old children. *Biological Trace Element  
55 Research*. 2009; **128**(2): 118-27.
- 56  
57  
58  
59  
60

132. Garenne M, Becher H, Ye Y, Kouyate B, Muller O. Sex-specific responses to zinc supplementation in Nouna, Burkina Faso. *Journal of Pediatric Gastroenterology & Nutrition*. 2007; **44**(5): 619-28.
133. Muller O, Becher H, van Zweeden AB, Ye Y, Diallo DA, Konate AT, et al. Effect of zinc supplementation on malaria and other causes of morbidity in west African children: randomised double blind placebo controlled trial. *BMJ*. 2001; **322**(7302): 1567.
134. Muller O, Garenne M, Reitmaier P, Baltussen van Zweeden A, Kouyate B, Becher H. Effect of zinc supplementation on growth in West African children: A randomized double-blind placebo-controlled trial in rural Burkina Faso. *International Journal of Epidemiology*. 2003; **32**(6): 1098-102.
135. Nakamura T, Nishiyama S, Futagoishi-Suginohara Y, Matsuda I, Higashi A. Mild to moderate zinc deficiency in short children: effect of zinc supplementation on linear growth velocity. *Journal of Pediatrics*. 1993; **123**(1): 65-9.
136. Ninh NX, Thissen JP, Collette L, Gerard G, Khoi HH, Ketelslegers JM. Zinc supplementation increases growth and circulating insulin-like growth factor I (IGF-I) in growth-retarded Vietnamese children. *American Journal of Clinical Nutrition*. 1996; **63**(4): 514-9.
137. Penny ME, Marin RM, Duran A, Peerson JM, Lanata CF, Lonnerdal B, et al. Randomized controlled trial of the effect of daily supplementation with zinc or multiple micronutrients on the morbidity, growth, and micronutrient status of young Peruvian children. *American Journal of Clinical Nutrition*. 2004; **79**(3): 457-65.
138. Penny ME, Peerson JM, Marin RM, Duran A, Lanata CF, Lonnerdal B, et al. Randomized, community-based trial of the effect of zinc supplementation, with and without other micronutrients, on the duration of persistent childhood diarrhea in Lima, Peru. *Journal of Pediatrics*. 1999; **135**(2 I): 208-17.
139. Rahman MM. Effect of simultaneous zinc and vitamin A supplementation on the biochemical indices of vitamin A nutriture, morbidity, and growth in Bangladeshi children: A randomized, double blind, placebo controlled trial [9968167]. United States -- Alabama: The University of Alabama at Birmingham School of Public Health; 1999.
140. Rahman MM, Tofail F, Wahed MA, Fuchs GJ, Baqui AH, Alvarez JO. Short-term supplementation with zinc and vitamin A has no significant effect on the growth of undernourished Bangladeshi children. *American Journal of Clinical Nutrition*. 2002; **75**(1): 87-91.
141. Rahman MM, Vermund SH, Wahed MA, Fuchs GJ, Baqui AH, Alvarez JO. Simultaneous zinc and vitamin A supplementation in Bangladeshi children: randomised double blind controlled trial. *BMJ*. 2001; **323**(7308): 314-8.
142. Rahman MM, Wahed MA, Fuchs GJ, Baqui AH, Alvarez JO. Synergistic effect of zinc and vitamin A on the biochemical indexes of vitamin A nutrition in children. *American Journal of Clinical Nutrition*. 2002; **75**(1): 92-8.
143. Richard SA, Zavaleta N, Caulfield LE, Black RE, Witzig RS, Shankar AH. Zinc and iron supplementation and malaria, diarrhea, and respiratory infections in children in the Peruvian Amazon. *Am J Trop Med Hyg*. 2006; **75**(1): 126-32.
144. Allen LH, Rosado JL, Casterline JE, Lopez P, Munoz E, Garcia OP, et al. Lack of hemoglobin response to iron supplementation in anemic mexican preschoolers with multiple micronutrient deficiencies. *American Journal of Clinical Nutrition*. 2000; **71**(6): 1485-94.
145. Munoz EC, Rosado JL, Lopez P, Furr HC, Allen LH. Iron and zinc supplementation improves indicators of vitamin A status of Mexican preschoolers. *American Journal of Clinical Nutrition*. 2000; **71**(3): 789-94.
146. Rosado JL, Lopez P, Munoz E, Martinez H, Allen LH. Zinc supplementation reduced morbidity, but neither zinc nor iron supplementation affected growth or body composition of Mexican preschoolers. *American Journal of Clinical Nutrition*. 1997; **65**(1): 13-9.
147. Rosales FJ, Kang Y, Pfeiffer B, Rau A, Romero-Abal ME, Erhardt JG, et al. Twice the recommended daily allowance of iron is associated with an increase in plasma alpha-1 antichymotrypsin concentrations in Guatemalan school-aged children. *Nutrition Research*. 2004; **24**(11): 875-87.

- 1 148. Bentley ME, Caulfield LE, Malathi R, Santizo MC, Hurtado E, Rivera JA, et al. Zinc  
2 supplementation affects the activity patterns of rural Guatemalan infants. *Journal of*  
3 *Nutrition*. 1997; **127**(7): 1333-8.
- 4 149. Rivera JA, Ruel MT, Santizo MC, Lonnerdal B, Brown KH. Zinc supplementation  
5 improves the growth of stunted rural Guatemalan infants. *Journal of Nutrition*. 1998; **128**(3):  
6 556-62.
- 7 150. Ruel MT, Rivera JA, Santizo MC, Lonnerdal B, Brown KH. Impact of zinc  
8 supplementation on morbidity from diarrhea and respiratory infections among rural  
9 Guatemalan children. *Pediatrics*. 1997; **99**(6): 808-13.
- 10 151. Ruz M, Castillo-Duran C, Lara X, Codoceo J, Rebolledo A, Alalah E. A 14-mo zinc-  
11 supplementation trial in apparently healthy Chilean preschool children. *American Journal of*  
12 *Clinical Nutrition*. 1997; **66**(6): 1406-13.
- 13 152. Penland JG, Sandstead HH, Alcock NW, Dayal HH, Chen XC, Li JS, et al. A  
14 preliminary report: effects of zinc and micronutrient repletion on growth and  
15 neuropsychological function of urban Chinese children. *Journal of the American College of*  
16 *Nutrition*. 1997; **16**(3): 268-72.
- 17 153. Sandstead HH, Penland JG, Alcock NW, Dayal HH, Chen XC, Li JS, et al. Effects of  
18 repletion with zinc and other micronutrients on neuropsychologic performance and growth  
19 of Chinese children. *American Journal of Clinical Nutrition*. 1998; **68**(Supplement 2): 470S-  
20 5S.
- 21 154. Sandstead HH, Prasad AS, Penland JG, Beck FWJ, Kaplan J, Egger NG, et al. Zinc  
22 deficiency in Mexican American children: influence of zinc and other micronutrients on T  
23 cells, cytokines, and antiinflammatory plasma proteins. *American Journal of Clinical*  
24 *Nutrition*. 2008; **88**(4): 1067-73.
- 25 155. Sanjur D, Garcia A, Aguilar R, Furumoto R, Mort M. Dietary patterns and nutrient  
26 intakes of toddlers from low-income families in Denver, Colorado. *Journal of the American*  
27 *Dietetic Association*. 1990; **90**(6): 823-9.
- 28 156. Sayeg Porto MA, Oliveira HP, Cunha AJ, Miranda G, Guimarães MM, Oliveira WA,  
29 et al. Linear growth and zinc supplementation in children with short stature. *Journal of*  
30 *pediatric endocrinology & metabolism : JPEM*; 2000. p. 1121-8.
- 31 157. Chugh K. Zinc therapy in acute diarrhea. *Indian Pediatrics*. 1996; **33**(4): 352.
- 32 158. Dhingra U, Hiremath G, Menon VP, Dhingra P, Sarkar A, Sazawal S. Zinc deficiency:  
33 descriptive epidemiology and morbidity among preschool children in peri-urban population  
34 in Delhi, India. *J Health Popul Nutr*. 2009; **27**(5): 632-9.
- 35 159. Sazawal S, Bentley M, Black RE, Dhingra P, George S, Bhan MK. Effect of zinc  
36 supplementation on observed activity in low socioeconomic Indian preschool children.  
37 *Pediatrics*. 1996; **98**(6): 1132-7.
- 38 160. Sazawal S, Black RE, Bhan MK, Bhandari N, Sinha A, Jalla S. Zinc supplementation  
39 in young children with acute diarrhea in India. *New England Journal of Medicine*. 1995;  
40 **333**(13): 839-44.
- 41 161. Sazawal S. Effect of zinc supplementation on diarrheal morbidity among urban slum  
42 children in India [9617598]. United States -- Maryland: The Johns Hopkins University;  
43 1996.
- 44 162. Sazawal S, Black RE, Bhan MK, Jalla S, Bhandari N, Sinha A, et al. Zinc  
45 supplementation reduces the incidence of persistent diarrhea and dysentery among low  
46 socioeconomic children in India. *Journal of Nutrition*. 1996; **126**(2): 443-50.
- 47 163. Sazawal S, Black RE, Bhan MK, Jalla S, Sinha A, Bhandari N. Efficacy of zinc  
48 supplementation in reducing the incidence and prevalence of acute diarrhea- a community-  
49 based, double-blind, controlled trial. *American Journal of Clinical Nutrition*. 1997; **66**(2):  
50 413-8.
- 51 164. Sazawal S, Black RE, Jalla S, Mazumdar S, Sinha A, Bhan MK. Zinc supplementation  
52 reduces the incidence of acute lower respiratory infections in infants and preschool children:  
53 A double-blind, controlled trial. *Pediatrics*. 1998; **102**(1 D): 1-5.
- 54 165. Sazawal S, Dhingra U, Deb S, Bhan MK, Menon VP, Black RE. Effect of zinc added  
55 to multi-vitamin supplementation containing low-dose vitamin A on plasma retinol level in  
56 children--a double-blind randomized, controlled trial. *J Health Popul Nutr*. 2007; **25**(1): 62-  
57 6.  
58  
59  
60

166. Sazawal S, Jalla S, Mazumder S, Sinha A, Black RE, Bhan MK. Effect of zinc supplementation on cell-mediated immunity and lymphocyte subsets in preschool children. *Indian Pediatrics*. 1997; **34**(7): 589-97.
167. Sazawal S, Black RE, Ramsan M, Chwaya HM, Dutta A, Dhingra U, et al. Effect of zinc supplementation on mortality in children aged 1-48 months: a community-based randomised placebo-controlled trial. *Lancet*. 2007; **369**(9565): 927-34.
168. Sazawal S, Black RE, Ramsan M, Chwaya HM, Stoltzfus RJ, Dutta A, et al. Effects of routine prophylactic supplementation with iron and folic acid on admission to hospital and mortality in preschool children in a high malaria transmission setting: community-based, randomised, placebo-controlled trial.[Erratum appears in *Lancet*. 2006 Jan 28;367(9507):302]. *Lancet*. 2006; **367**(9505): 133-43.
169. de Benoist B, Darnton-Hill I, Lynch S, Allen L, Savioli L. Zinc and iron supplementation trials in Nepal and Tanzania. *Lancet*. 2006; **367**(9513): 816.
170. Kordas K, Siegel EH, Olney DK, Katz J, Tielsch JM, Kariger PK, et al. The effects of iron and/or zinc supplementation on maternal reports of sleep in infants from Nepal and Zanzibar. *J Dev Behav Pediatr*. 2009; **30**(2): 131-9.
171. Olney DK, Pollitt E, Kariger PK, Khalfan SS, Ali NS, Tielsch JM, et al. Combined iron and folic acid supplementation with or without zinc reduces time to walking unassisted among Zanzibari infants 5- to 11-mo old. *Journal of Nutrition*. 2006; **136**(9): 2427-34.
172. Kariger PK, Stoltzfus RJ, Olney D, Sazawal S, Black R, Tielsch JM, et al. Iron deficiency and physical growth predict attainment of walking but not crawling in poorly nourished Zanzibari infants. *The Journal of nutrition*. 2005; **135**(4): 814-9.
173. Kordas K, Siegel EH, Olney DK, Katz J, Tielsch JM, Chwaya HM, et al. Maternal reports of sleep in 6-18 month-old infants from Nepal and Zanzibar: association with iron deficiency anemia and stunting. *Early Human Development*. 2008; **84**(6): 389-98.
174. DK. O. Modeling The Effects Of Anemia, Malaria, Growth And Micronutrient Supplementation On Development Of Young Zanzibari Children. Davis, CA: University of California, Davis; 2006.
175. Olney DK, Pollitt E, Kariger PK, Khalfan SS, Ali NS, Tielsch JM, et al. Young Zanzibari children with iron deficiency, iron deficiency anemia, stunting, or malaria have lower motor activity scores and spend less time in locomotion. *The Journal of nutrition*. 2007; **137**(12): 2756-62.
176. Olney DK KP, Stoltzfus RJ, Khalfan SS, Ali NS, Tielsch JM, et al. Development of nutritionally at-risk young children is predicted by malaria, anemia, and stunting in Pemba, Zanzibar. *Journal of Nutrition* 2009; **139**(4): 763-72.
177. Schultink W, Merzenich M, Gross R, Shrimpton R, Dillon D. Effects of iron-zinc supplementation on the iron, zinc, and vitamin A status of anaemic pre-school children in Indonesia. *Food and Nutrition Bulletin*. 1997; **18**(4): 311-7.
178. Correa León E TM, Navarrete F, Aguirre L, Saa B. Deficiencia De Zinc E Inmunidad Celular. Quito, Ecuador: FCM; 1992.
179. Sempertegui F, Estrella B, Correa E, Aguirre L, Saa B, Torres M, et al. Effects of short-term zinc supplementation on cellular immunity, respiratory symptoms, and growth of malnourished Equadorian children. *European Journal of Clinical Nutrition*. 1996; **50**(1): 42-6.
180. Shah U, Malik MA, Alam S, Shaheen A, Mohammad R, AlTannir M. The efficacy of zinc supplementation in young children with recurrent acute lower respiratory infections: A randomized double-blind placebo controlled trial. *Journal of Paediatrics and Child Health*. 2011; **47**: 13.
181. Shankar AH, Genton B, Baisor M, Jaino P, Tamja S, Adiguma T, et al. The influence of zinc supplementation on morbidity due to *Plasmodium falciparum*: A randomized trial in preschool children in Papua New Guinea. *American Journal of Tropical Medicine and Hygiene*. 2000; **62**(6): 663-9.
182. Shankar AH GB, Tamja S, Arnold S, Wu L, Baisor M, et al. Zinc supplementation can reduce malaria-related morbidity in preschool children. *American Journal of Tropical Medicine and Hygiene*. 1997; **57**(Supplement 3): 249 (Abstract 434).
183. Silva APR, Vitolo MR, Zara LF, Castro CFS. Efeito da suplementação de zinco a crianças de 1 a 5 anos de idade. *J pediatr (Rio J)*. 2006; **82**(3): 227-31.

184. Smith JC, Makdani D, Hegar A, Rao D, Douglass LW. Vitamin A and zinc supplementation of preschool children. *Journal of the American College of Nutrition*; 1999. p. 213-22.
185. Soofi S, Cousens S, Iqbal SP, Akhund T, Khan J, Ahmed I, et al. Effect of provision of daily zinc and iron with several micronutrients on growth and morbidity among young children in Pakistan: a cluster-randomised trial. *Lancet*. 2013.
186. Coles CL, Sherchand JB, Khatri SK, Katz J, Leclercq SC, Mullany LC, et al. Zinc modifies the association between nasopharyngeal *Streptococcus pneumoniae* carriage and risk of acute lower respiratory infection among young children in rural Nepal. *Journal of Nutrition*. 2008; **138**(12): 2462-7.
187. Katz J, Khatri SK, Leclercq SC, Mullany LC, Yanik EL, Stoltzfus RJ, et al. Daily supplementation with iron plus folic acid, zinc, and their combination is not associated with younger age at first walking unassisted in malnourished preschool children from a deficient population in rural Nepal. *Journal of Nutrition*. 2010; **140**(7): 1317-21.
188. Murray-Kolb LE, Khatri SK, Katz J, Schaefer BA, Cole PM, Le Clerq SC, et al. Preschool micronutrient supplementation effects on intellectual and motor function in school-aged nepalese children. *Archives of Pediatrics and Adolescent Medicine*. 2012; **166**(5): 404-10.
189. Siegel EH. Anemia, motor development, and cognition: A randomized trial of iron-folic acid and/or zinc supplementation in young Nepali children [3172698]. United States -- Maryland: The Johns Hopkins University; 2005.
190. Siegel EH, Kordas K, Stoltzfus RJ, Katz J, Khatri SK, LeClerq SC, et al. Inconsistent effects of iron-folic acid and/or zinc supplementation on the cognitive development of infants. *Journal of health, population, and nutrition*. 2011; **29**(6): 593-604.
191. Surkan PJ, Shankar M, Katz J, Siegel EH, Leclercq SC, Khatri SK, et al. Beneficial effects of zinc supplementation on head circumference of Nepalese infants and toddlers: a randomized controlled trial. *European Journal of Clinical Nutrition*. 2012; **66**(7): 836-42.
192. Tielsch JM, Khatri SK, Stoltzfus RJ, Katz J, LeClerq SC, Adhikari R, et al. Effect of daily zinc supplementation on child mortality in southern Nepal: a community-based, cluster randomised, placebo-controlled trial. *Lancet*. 2007; **370**(9594): 1230-9.
193. Tielsch JM, Khatri SK, Stoltzfus RJ, Katz J, LeClerq SC, Adhikari R, et al. Effect of routine prophylactic supplementation with iron and folic acid on preschool child mortality in southern Nepal: community-based, cluster-randomised, placebo-controlled trial. *Lancet*. 2006; **367**(9505): 144-52.
194. Tupe RP, Chiplonkar SA. Zinc supplementation improved cognitive performance and taste acuity in Indian adolescent girls. *Journal of the American College of Nutrition*. 2009; **28**(4): 388-96.
195. Chiplonkar SA, Kawade R. Effect of zinc- and micronutrient-rich food supplements on zinc and vitamin A status of adolescent girls. *Nutrition*. 2012; **28**(5): 551-8.
196. Uçkarde, Y., Tekçiçek M, Ozmert EN, Yurdakök K. The effect of systemic zinc supplementation on oral health in low socioeconomic level children. *The Turkish journal of pediatrics*; 2009. p. 424-8.
197. Uckardes Y, Ozmert EN, Unal F, Yurdakök K. Effects of zinc supplementation on parent and teacher behaviour rating scores in low socioeconomic level Turkish primary school children. *Acta Paediatrica*. 2009; **98**(4): 731-6.
198. Uckardes Y, Ozmert EN, Unal F, Yurdakök K. The effect of zinc supplementation on Hacettepe Psychological Adaptation Scale scores in low socioeconomic level primary school children. *Cocuk Saglig ve Hastaliklar Dergisi*. 2009; **52**(2): 53-9.
199. Kramer TR, Udomkesmalee E, Dhanamitta S, Sirisinha S, Charoenkiatkul S, Tuntipopipat S, et al. Lymphocyte responsiveness of children supplemented with vitamin A and zinc. *American Journal of Clinical Nutrition*. 1993; **58**(4): 566-70.
200. Udomkesmalee E, Dhanamitta S, Sirisinha S. Effect of vitamin A and zinc supplementation on the nutriture of children in northeast Thailand. *American Journal of Clinical Nutrition*. 1992; **56**(1): 50-7.
201. Gibson RS. Zinc supplementation for infants. *Lancet*. 2000; **355**(9220): 2008-9.
202. Umata M, West CE, Haidar J. Zinc supplements increased growth more in stunted infants than in non-stunted infants. *Evidence-Based Medicine*. 2001; **6**(2): 50.

- 1  
2  
3  
4  
5  
6  
7  
8  
9  
10  
11  
12  
13  
14  
15  
16  
17  
18  
19  
20  
21  
22  
23  
24  
25  
26  
27  
28  
29  
30  
31  
32  
33  
34  
35  
36  
37  
38  
39  
40  
41  
42  
43  
44  
45  
46  
47  
48  
49  
50  
51  
52  
53  
54  
55  
56  
57  
58  
59  
60
203. Umeta M, West CE, Haidar J, Deurenberg P, Hautvast JG. Zinc supplementation and stunted infants in Ethiopia: a randomised controlled trial. *Lancet*. 2000; **355**(9220): 2021-6.
204. Vakili R, Vahedian M, Khodaei GH, Mahmoudi M. Effects of zinc supplementation in occurrence and duration of common cold in school aged children during cold season: A double-blind placebo-controlled Trial. *Iranian Journal of Pediatrics*. 2009; **19**(4): 376-80.
205. Veenemans J. Effect of preventive supplementation with zinc and other micronutrients on malaria and diarrhoeal morbidity in African children [Thesis]. Wageningen, Netherlands: Wageningen University; 2011.
206. Veenemans J, Mank T, Ottenhof M, Baidjoe A, Mbugi EV, Demir AY, et al. Protection against diarrhea associated with *Giardia intestinalis* Is lost with multi-nutrient supplementation: a study in Tanzanian children. *PLoS neglected tropical diseases*. 2011; **5**(6): e1158.
207. Veenemans J, Milligan P, Prentice AM, Schouten LR, Inja N, Heijden AC, et al. Effect of supplementation with zinc and other micronutrients on malaria in Tanzanian children: a randomised trial. *PLoS medicine*; 2011. p. e1001125.
208. Veenemans J, Schouten LRA, Ottenhof MJ, Mank TG, Uges DRA, Mbugi EV, et al. Effect of preventive supplementation with zinc and other micronutrients on non-malarial morbidity in Tanzanian pre-school children: a randomized trial. *PLoS ONE [Electronic Resource]*. 2012; **7**(8): e41630.
209. Krebs NF, Hambidge KM, Walravens PA. Increased food intake of young children receiving a zinc supplement. *American Journal of Diseases of Children*. 1984; **138**(3): 270-3.
210. Walravens PA, Krebs NF, Hambidge KM. Linear growth of low income preschool children receiving a zinc supplement. *American Journal of Clinical Nutrition*. 1983; **38**(2): 195-201.
211. Walravens PA, Hambidge KM, Koepfer DM. Zinc supplementation in infants with a nutritional pattern of failure to thrive: A double-blind, controlled study. *Pediatrics*. 1989; **83**(4): 532-8.
212. Wessells R OZ, Rouamba N, Hess SY, Ouedraogo JB, Brown KH. The effect of zinc supplementation, provided as either a liquid ZnSO<sub>4</sub> solution or a dispersible tablet, on plasma zinc concentration among young Burkinabe children. *FASEB Journal Conference: Experimental Biology*. 2011; **25:236.1**(236): 1.
213. Wessells KR, Ouedraogo ZP, Rouamba N, Hess SY, Ouedraogo J-B, Brown KH. Short-term zinc supplementation with dispersible tablets or zinc sulfate solution yields similar positive effects on plasma zinc concentration of young children in Burkina Faso: a randomized controlled trial. *Journal of Pediatrics*. 2012; **160**(1): 129-35.e3.
214. Wuehler SE, Sempertegui F, Brown KH. Dose-response trial of prophylactic zinc supplements, with or without copper, in young Ecuadorian children at risk of zinc deficiency. *American Journal of Clinical Nutrition*. 2008; **87**(3): 723-33.
215. Wuehler S. Estimation of the global risk of zinc deficiency and assessment of the impact of three doses of zinc supplementation, with or without copper, on markers of zinc and copper status, morbidity and growth among young Ecuadorian children [0819713]. United States -- California: University of California, Davis; 2007.

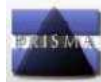

# PRISMA 2009 Checklist

| Section/topic                      | #  | Checklist item                                                                                                                                                                                                                                                                                              | Reported on page # |
|------------------------------------|----|-------------------------------------------------------------------------------------------------------------------------------------------------------------------------------------------------------------------------------------------------------------------------------------------------------------|--------------------|
| <b>TITLE</b>                       |    |                                                                                                                                                                                                                                                                                                             |                    |
| Title                              | 1  | Identify the report as a systematic review, meta-analysis, or both.                                                                                                                                                                                                                                         | 1                  |
| <b>ABSTRACT</b>                    |    |                                                                                                                                                                                                                                                                                                             |                    |
| Structured summary                 | 2  | Provide a structured summary including, as applicable: background; objectives; data sources; study eligibility criteria, participants, and interventions; study appraisal and synthesis methods; results; limitations; conclusions and implications of key findings; systematic review registration number. | 2                  |
| <b>INTRODUCTION</b>                |    |                                                                                                                                                                                                                                                                                                             |                    |
| Rationale                          | 3  | Describe the rationale for the review in the context of what is already known.                                                                                                                                                                                                                              | 3                  |
| Objectives                         | 4  | Provide an explicit statement of questions being addressed with reference to participants, interventions, comparisons, outcomes, and study design (PICOS).                                                                                                                                                  | 3                  |
| <b>METHODS</b>                     |    |                                                                                                                                                                                                                                                                                                             |                    |
| Protocol and registration          | 5  | Indicate if a review protocol exists, if and where it can be accessed (e.g., Web address), and, if available, provide registration information including registration number.                                                                                                                               | 3                  |
| Eligibility criteria               | 6  | Specify study characteristics (e.g., PICOS, length of follow-up) and report characteristics (e.g., years considered, language, publication status) used as criteria for eligibility, giving rationale.                                                                                                      | 3                  |
| Information sources                | 7  | Describe all information sources (e.g., databases with dates of coverage, contact with study authors to identify additional studies) in the search and date last searched.                                                                                                                                  | 3, App 1           |
| Search                             | 8  | Present full electronic search strategy for at least one database, including any limits used, such that it could be repeated.                                                                                                                                                                               | App 1              |
| Study selection                    | 9  | State the process for selecting studies (i.e., screening, eligibility, included in systematic review, and, if applicable, included in the meta-analysis).                                                                                                                                                   | 3                  |
| Data collection process            | 10 | Describe method of data extraction from reports (e.g., piloted forms, independently, in duplicate) and any processes for obtaining and confirming data from investigators.                                                                                                                                  | 3                  |
| Data items                         | 11 | List and define all variables for which data were sought (e.g., PICOS, funding sources) and any assumptions and simplifications made.                                                                                                                                                                       | 3                  |
| Risk of bias in individual studies | 12 | Describe methods used for assessing risk of bias of individual studies (including specification of whether this was done at the study or outcome level), and how this information is to be used in any data synthesis.                                                                                      | 3, 5               |
| Summary measures                   | 13 | State the principal summary measures (e.g., risk ratio, difference in means).                                                                                                                                                                                                                               | 3                  |
| Synthesis of results               | 14 | Describe the methods of handling data and combining results of studies, if done, including measures of consistency (e.g., $I^2$ for each meta-analysis).                                                                                                                                                    | 3                  |



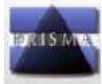

# PRISMA 2009 Checklist

Page 1 of 2

| Section/topic                 | #  | Checklist item                                                                                                                                                                                           | Reported on page #        |
|-------------------------------|----|----------------------------------------------------------------------------------------------------------------------------------------------------------------------------------------------------------|---------------------------|
| Risk of bias across studies   | 15 | Specify any assessment of risk of bias that may affect the cumulative evidence (e.g., publication bias, selective reporting within studies).                                                             | 4                         |
| Additional analyses           | 16 | Describe methods of additional analyses (e.g., sensitivity or subgroup analyses, meta-regression), if done, indicating which were pre-specified.                                                         | 3, 5-6                    |
| <b>RESULTS</b>                |    |                                                                                                                                                                                                          |                           |
| Study selection               | 17 | Give numbers of studies screened, assessed for eligibility, and included in the review, with reasons for exclusions at each stage, ideally with a flow diagram.                                          | 4, Fig 1                  |
| Study characteristics         | 18 | For each study, present characteristics for which data were extracted (e.g., study size, PICOS, follow-up period) and provide the citations.                                                             | App 4                     |
| Risk of bias within studies   | 19 | Present data on risk of bias of each study and, if available, any outcome level assessment (see item 12).                                                                                                | App 5                     |
| Results of individual studies | 20 | For all outcomes considered (benefits or harms), present, for each study: (a) simple summary data for each intervention group (b) effect estimates and confidence intervals, ideally with a forest plot. | Fig 3 to 5, App 7         |
| Synthesis of results          | 21 | Present results of each meta-analysis done, including confidence intervals and measures of consistency.                                                                                                  | 4-5, Table 2-3            |
| Risk of bias across studies   | 22 | Present results of any assessment of risk of bias across studies (see Item 15).                                                                                                                          | 4, Fig 2                  |
| Additional analysis           | 23 | Give results of additional analyses, if done (e.g., sensitivity or subgroup analyses, meta-regression [see Item 16]).                                                                                    | 5-6, Table 4, App 6 and 8 |
| <b>DISCUSSION</b>             |    |                                                                                                                                                                                                          |                           |
| Summary of evidence           | 24 | Summarize the main findings including the strength of evidence for each main outcome; consider their relevance to key groups (e.g., healthcare providers, users, and policy makers).                     | 6-7                       |
| Limitations                   | 25 | Discuss limitations at study and outcome level (e.g., risk of bias), and at review-level (e.g., incomplete retrieval of identified research, reporting bias).                                            | 6-7                       |
| Conclusions                   | 26 | Provide a general interpretation of the results in the context of other evidence, and implications for future research.                                                                                  | 7                         |
| <b>FUNDING</b>                |    |                                                                                                                                                                                                          |                           |
| Funding                       | 27 | Describe sources of funding for the systematic review and other support (e.g., supply of data); role of funders for the systematic review.                                                               | 2                         |

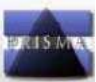

# PRISMA 2009 Checklist

- 1
- 2
- 3
- 4
- 5
- 6
- 7
- 8
- 9
- 10
- 11
- 12
- 13
- 14
- 15
- 16
- 17
- 18
- 19
- 20
- 21
- 22
- 23
- 24
- 25
- 26
- 27
- 28
- 29
- 30
- 31
- 32
- 33
- 34
- 35
- 36
- 37
- 38
- 39
- 40
- 41
- 42
- 43
- 44
- 45
- 46
- 47
- 48
- 49

For more information, visit: [www.prisma-statement.org](http://www.prisma-statement.org).

Page 2 of 2

For peer review only

# BMJ Open

## Preventive zinc supplementation for children, and the effect of additional iron: A systematic review and meta-analysis

|                                 |                                                                                                                                                                                                                                                                                                     |
|---------------------------------|-----------------------------------------------------------------------------------------------------------------------------------------------------------------------------------------------------------------------------------------------------------------------------------------------------|
| Journal:                        | <i>BMJ Open</i>                                                                                                                                                                                                                                                                                     |
| Manuscript ID:                  | bmjopen-2013-004647.R1                                                                                                                                                                                                                                                                              |
| Article Type:                   | Research                                                                                                                                                                                                                                                                                            |
| Date Submitted by the Author:   | 13-May-2014                                                                                                                                                                                                                                                                                         |
| Complete List of Authors:       | Mayo-Wilson, Evan; UCL, Clinical, Educational & Health Psychology<br>Imdad, Aamer; SUNY Upstate Medical University, Department of Pediatrics<br>Junior, Jean; Harvard, Medical School<br>Dean, Sohni; Albert Einstein Medical Center,<br>Bhutta, Zulfiqar; SickKids Center for Global Child Health, |
| <b>Primary Subject Heading</b>: | Global health                                                                                                                                                                                                                                                                                       |
| Secondary Subject Heading:      | Nutrition and metabolism, Public health, Paediatrics                                                                                                                                                                                                                                                |
| Keywords:                       | PREVENTIVE MEDICINE, PUBLIC HEALTH, Clinical trials < THERAPEUTICS,<br>Nutrition < TROPICAL MEDICINE                                                                                                                                                                                                |
|                                 |                                                                                                                                                                                                                                                                                                     |

SCHOLARONE™  
Manuscripts

only

1 **Preventive zinc supplementation for children, and the effect of additional iron: A systematic**  
2 **review and meta-analysis**

3 Evan Mayo-Wilson (DPhil),<sup>1</sup> Aamer Imdad (MD),<sup>2</sup> Jean Junior (MSc),<sup>3</sup> Sohni Dean (MD),<sup>4</sup> Zulfiqar  
4 A. Bhutta (PhD)<sup>5</sup>

5  
6  
7 <sup>1</sup> Assistant Scientist  
8 Center for Clinical Trials  
9 Department of Epidemiology  
10 Johns Hopkins Bloomberg School of Public Health  
11 615 North Wolfe Street, E6610  
12 Baltimore, MD 21205  
13 USA

14 <sup>2</sup> Pediatric Resident  
15 Department of Pediatrics  
16 SUNY Upstate Medical University  
17 Syracuse, New York  
18 USA

19 <sup>3</sup> Medical Student  
20 Harvard Medical School  
21 107 Avenue Louis Pasteur  
22 Boston, MA 02115  
23 USA

24 <sup>4</sup> Paediatric Resident  
25 Albert Einstein Medical Center  
26 5501 Old York Road  
27 Philadelphia, Pennsylvania 19141  
28 USA

29 <sup>5</sup> Robert Harding Chair in Global Child Health, SickKids Center for Global Child Health,  
30 555 University Avenue  
31 Toronto M5G 1X8, Canada &  
32 Founding Director  
33 Center of Excellence in Women and Child Health  
34 The Aga Khan University, Karachi, Pakistan  
35 Correspondence to: [zulfiqar.bhutta@sickkids.ca](mailto:zulfiqar.bhutta@sickkids.ca)  
36  
37  
38  
39  
40  
41  
42  
43  
44  
45  
46  
47  
48  
49  
50  
51  
52  
53  
54  
55  
56  
57  
58  
59  
60

## ABSTRACT

### Objective

Zinc deficiency is widespread, and preventive supplementation may have benefits in young children. Effects for children over 5 years of age, and effects when coadministered with other micronutrients are uncertain. These are obstacles to scale-up. This review seeks to determine if preventive supplementation reduces mortality and morbidity for children ages 6 months to 12 years.

### Design

Systematic review conducted with the Cochrane Developmental, Psychosocial and Learning Problems Group. Two reviewers independently assessed studies. Meta-analyses were performed for mortality, illness, and side effects.

### Data sources

We searched multiple databases, including CENTRAL and Medline in January 2013. Authors were contacted for missing information.

### Eligibility criteria for selecting studies

Randomised trials of preventive zinc supplementation. Hospitalised children and children with chronic diseases were excluded.

### Results

Eighty randomised trials with 205401 participants were included. There was a small but non-significant effect on all-cause mortality (risk ratio 0.95 [95% CI 0.86 to 1.05]). Supplementation may reduce incidence of all-cause diarrhoea (risk ratio 0.87 [0.85 to 0.89]), but there was evidence of reporting bias. There was no evidence of an effect of incidence or prevalence of respiratory infections or malaria. There was moderate quality evidence of a very small effect on linear growth (SMD 0.09 [0.06 to 0.13]) and an increase in vomiting (RR 1.29 [1.14 to 1.46]). There was no evidence of an effect on iron status. Comparing zinc with and without iron co-supplementation and direct comparisons of zinc plus iron versus zinc administered alone favoured co-intervention for some outcomes and zinc alone for other outcomes. Effects may be larger for children over one year of age, but most differences were not significant.

### Conclusions

Benefits of preventive zinc supplementation may outweigh any potential adverse effects in areas where risk of zinc deficiency is high. Further research should determine optimal intervention characteristics and delivery strategies.

## STRENGTHS AND LIMITATIONS OF THIS STUDY

This large review was conducted according to best practices and includes the highest quality current evidence about the effects of zinc supplementation.

We investigated several outcomes made multiple comparisons to explore the most important main effects and interactions.

The analyses in this review could not identify the best way to deliver zinc supplements to children in need.

## INTRODUCTION

Regular dietary zinc intake is required because zinc cannot be produced or stored.<sup>1,2</sup> In 2011, 116000 deaths in children under 5 years were attributable to zinc deficiency (1.7% of mortalities in this group).<sup>3</sup>

Previous reviews reach disparate conclusions about the benefits of zinc supplementation for young children,<sup>4-12</sup> and most have not examined evidence for children over 5 years of age. Zinc deficiency is prevalent in areas with other micronutrient deficiencies. Concerns about the administration of zinc with iron have been an obstacle to widespread delivery.<sup>13</sup> Understanding the effects of preventive zinc supplementation alone and with iron is crucially important to the future of global health policy.

To evaluate the effects of zinc with or without iron on illness and mortality, as well as growth, we analysed direct comparisons (i.e. zinc plus iron versus zinc alone) as well as subgroups within an overall analysis.

## METHODS

### Selection criteria and search strategy

Following a published protocol,<sup>14</sup> we conducted a systematic review of randomised clinical trials (RCTs) of orally administered zinc compared with placebo and non-zinc co-interventions received by both groups (e.g. vitamin A). We also compared zinc with and without iron co-supplementation. Participants were six months to 12 years of age. We excluded studies of food fortification and children who were acutely ill.

We searched African Index Medicus, CENTRAL, Conference Proceedings Citation Index, EMBASE, Global Health, ICTRP, IndMED, LILACS, MEDLINE, metaRegister of Controlled Trials, ProQuest Dissertations & Theses Database, and WHOLIS in December 2012 and January 2013 (Appendix 1). Reference lists from previous reviews and from included studies were examined, and trial authors were contacted for unpublished data. Two authors independently reviewed citations and extracted data, including participant demographics, details of the intervention, outcomes, and risk of bias.<sup>15</sup>

### Data synthesis

Relative risks and 95% confidence intervals (CIs) were calculated using Mantel-Haenszel methods. Standardised mean differences (SMDs) and 95% CIs were calculated for continuous measures using Hedges *g* and combined using inverse variance methods. When studies reported data in multiple formats, we calculated the SMD and its standard error in Comprehensive Meta-Analysis (CMA) Version 2 before entering data in Review Manager (RevMan) Version 5.2. For incidence data, we combined risk ratios (events per child) and rate ratios (events per child year) because trials were relatively short and we did not anticipate interactions between the intervention and time at risk. For cluster-randomised trials, we used effects controlling for clustering, or we used an intra-cluster correlation coefficient (ICC) to estimate robust standard errors.<sup>15</sup> We used fixed-effect methods for all meta-analyses. Effects favour intervention when the relative risk is reduced (RR<1) or the standardised difference is positive (SMD>0).

When 10 or more studies reported an outcome, we conducted subgroup analyses to explore the effects of iron co-supplementation, national income (low-income countries compared with others), stunting, age (6-12 months, more than 12 months), dose (0-5mg, 5-10mg, etc.), duration (0-6 months, 6-12 months, more than 12 months), and formulation.

### Quality of the evidence

Quality of the evidence was judged independently using GRADE.<sup>16</sup> The GRADE system rates evidence from each analysis (i.e., pooled data where possible) as “high”, “moderate”, “low” or “very low”. A “high” rating suggests that evidence is unlikely to be affected by further studies; a “low” rating suggests that further research is required to confirm the direction and magnitude of the true effect. Ratings for meta-analyses of randomised controlled trials start at “high” and may be downgraded for threats to internal validity (i.e. within-study bias), inconsistency (i.e. heterogeneity in results across studies), indirectness (e.g. measures are proxies for the true outcome of interest), imprecision (e.g. few participants, wide confidence intervals), and reporting bias (i.e. publication bias and selective outcome reporting). Because GRADE considers several domains in addition to internal validity, confidence in overall effects may be “low” or “very low” even when all studies were conducted rigorously. The following sections include both significant and non-significant statistical results, and GRADE ratings in the text and tables provide further information about our confidence in these estimates.

## RESULTS

### Results of the search

From 6384 records, 80 studies were included (Figure 1). Seventy-five studies were published in English, two each in Spanish and Portuguese, one in Chinese. Reasons for excluding 27 studies were enumerated (Appendix 2); additionally, 11 on-going studies were identified, and 5 studies could not be obtained. Seven included studies did not contribute to any meta-analysis because they did not report sufficient data (Appendix 3).

### Study characteristics

Included studies assigned 205923 eligible participants (Appendix 4). Twenty trials used factorial designs; there were 100 independent comparisons isolating zinc, and co-interventions were provided to both groups in 51 comparisons. There were 8 independent comparisons of iron with zinc versus zinc alone including 1898 eligible participants. Sample sizes ranged from 21 to 72438 eligible participants (median=200). Nine studies were cluster-randomised, including two randomising households. Three studies included 88% of participants.<sup>17-19</sup> Forty-six studies reported the mean baseline plasma or serum zinc concentration of their participants; the median of these mean concentrations was 72.5 µg/dL.

Thirty-two countries are represented; most studies were conducted in low- or middle-income countries: 37 in Asia, 26 in Latin America and the Caribbean, and 10 in sub-Saharan Africa. The median of mean age at baseline was 28 months, and 22 studies included children over 5 years of age. Both stunted and non-stunted children were included in 42 studies; 5 included only stunted children, 5 included only non-stunted children, and 28 did not specify if participants were stunted.

Studies provided zinc for less than 6 months (30), 6 to 12 months (33), and 12 months or more (16). Of those reporting frequency of zinc supplementation, 48 provided zinc daily and 11 provided zinc weekly. Where reported, daily dose was 0 to 5 mg (5), 5 to 10 mg (19), 10 to 15 mg (30), 15 to 20 mg (8), and 20 mg or more (12). Studies reporting the chemical compound of their zinc supplements provided zinc as sulfate (45), gluconate (12), acetate (six), and other compounds (8). Studies comparing zinc with iron versus zinc alone provided daily dose equivalents of 3 to 36 mg of iron. Outcomes were observed for about 26 weeks (median) after randomisation, with follow-up from 2 to 80 weeks.

### Risk of bias

Randomisation and allocation concealment were adequate in 34 and 32 studies; 46 and 48 studies were unclear (Figure 2). For blinding of participants and personnel, 63 studies were at low risk of bias. For blinding of outcome assessment, 65 studies were at low risk of bias. For both types of blinding, 15 studies were unclear.

For all analyses, we attempted to include all randomised study participants; 47 studies were at low risk of bias for incomplete data, 31 were unclear, and 2 were at high risk. For selective reporting, 3 studies were at low risk of bias, 44 were at unclear risk, and 32 were at high risk (Appendix 5).

Bias may affect secondary outcomes in this review, but it does not appear to be important for the primary outcome. For example, mortality and other objective measures are not vulnerable to bias related to blinding, and many missing outcomes were biomarkers or growth related.

### Effects of zinc supplementation

In addition to outcomes included in the Summary of Findings Table (Table 1), we analysed results for hospitalisation; prevalence of morbidities; additional measures of growth; as well as biological indicators of zinc, haemoglobin, iron, and copper status (Table 2). Subgroup analyses compare the effects of zinc supplementation with and without iron coadministration (Table 4, Appendix 6).

Fourteen studies including 138302 participants were analysed for all-cause mortality, though other studies included no deaths in either group (Figure 3), and there was high quality evidence of a small effect (risk ratio 0.95 [0.86 to 1.05]). There were similar effects for mortality due to diarrhoea (RR 0.95 [0.69 to 1.31]), mortality due to LRTI (RR 0.86 [0.64 to 1.15]), and mortality due to malaria (RR 0.90 [0.77 to 1.06]), and the evidence for these outcomes was moderate quality.

In 25 studies including 15042 participants, there was low quality evidence of a 13% reduction in incidence of all-cause diarrhoea (Figure 4; RR 0.87 [0.85 to 0.89]). Other measures of diarrhoea were consistent with no difference or with a small reduction in morbidity, including: prevalence of all-cause

1 diarrhoea, hospitalisation due to all-cause diarrhoea, incidence of severe diarrhoea, prevalence of  
2 severe diarrhoea, incidence of persistent diarrhoea, and prevalence of persistent diarrhoea.

3  
4 In twelve trials (9610 participants), there was high quality evidence of no effect on LRTI incidence  
5 (Appendix 7; RR 1.00 [0.94 to 1.07]). One trial reported no LRTI in either group.<sup>20</sup> Results for  
6 prevalence were consistent with no difference in respiratory morbidity.

7  
8 Four trials (2407 participants) found moderate quality evidence that would be consistent with no  
9 effect or a harmful effect on malaria incidence (RR 1.04 [0.94, 1.14]). One study reported no  
10 significant effect on malaria prevalence.

11  
12 Fifty studies reported height for 13669 participants (Figure 5). There was moderate quality evidence  
13 of a very small but statistically significant increase in linear growth (SMD 0.09 [0.06 to 0.13]).  
14 Results for weight, weight-to-height ratio and prevalence of stunting were consistent with no  
15 difference or a small effect on growth.

16  
17 Forty-six studies reported serum zinc for 9810 participants. There was evidence of a medium effect  
18 (SMD 0.62 [0.58 to 0.67]) on zinc concentration. Results consistently favoured zinc rather than no-  
19 intervention, but they were extremely inconsistent in magnitude, possibly due to differences in  
20 participants and settings ( $\text{Chi}^2=582.45$ ,  $\text{df}=47$  ( $P < 0.00001$ );  $I^2=91\%$ ). Eleven studies reported serum  
21 copper for 3071 participants (1% of participants in this review). There was very low quality evidence  
22 of a small reduction in copper (SMD -0.22 [-0.29 to 0.14]); as above, the results were inconsistent  
23 ( $\text{Chi}^2=37.47$ ,  $\text{df}=10$  ( $P < 0.0002$ );  $I^2=68\%$ ). There was no evidence of an effect on haemoglobin,  
24 prevalence of anaemia, or iron status.

25  
26 In five trials (35192 participants) there was high quality evidence of increased vomiting (RR 1.29  
27 [1.14 to 1.46]). Two trials reported no adverse events in either group (i.e. supplemented or non-  
28 supplemented).<sup>21,22</sup> Results for study withdrawal, participants with one or more side effects, and  
29 number of vomiting episodes indicate some short-term side effects; there was no evidence of serious  
30 adverse events.

### 30 **Effects of zinc plus iron compared with zinc alone**

31 Effects on mortality were not significantly different between subgroups with and without iron  
32 ( $\text{Chi}^2=1.30$ ,  $p=0.25$ ); however, there was no mortality effect in groups receiving iron (RR 0.99 [0.86  
33 to 1.15]) while the effect for groups that did not receive iron was nearly significant (RR 0.89 [0.79 to  
34 1.00]). Effects on incidence of diarrhoea differed between groups (Figure 4;  $\text{Chi}^2=65.11$ ,  $p < 0.00001$ ),  
35 with no benefit for the group that received iron (RR 1.00 [0.96 to 1.05]) and a significant benefit for  
36 the group that did not receive iron (RR 0.82 [0.80 to 0.84]). There were significant effects with and  
37 without iron co-supplementation on zinc status; these were greater in the studies without iron for  
38 serum zinc ( $\text{Chi}^2=27.07$ ,  $p < 0.00001$ ) and prevalence of zinc deficiency ( $\text{Chi}^2=34.27$ ,  $p < 0.00001$ ).  
39 There were also differences between these groups of studies for serum ferritin and serum copper; zinc  
40 had no effect in studies with iron co-intervention, but zinc without iron co-intervention reduced  
41 ferritin and copper. Overall effects on growth were small; there was a significant difference between  
42 subgroups for height but not weight, and the difference for weight-to-height ratio favoured the group  
43 that received iron (i.e. the opposite of other results). There were no significant effects in either  
44 subgroup for lower respiratory tract infections, serum haemoglobin, prevalence of anaemia, or  
45 prevalence of iron deficiency.

46  
47 Several trials compared zinc coadministered with iron versus zinc given alone (Appendix 6). One trial  
48 reported no significant difference in all-cause mortality (323 participants; RR 0.33 [0.01 to 8.39]). In  
49 five trials (1530 participants), effects on incidence of all-cause diarrhoea favoured zinc alone (RR  
50 1.10 [1.03 to 1.18]). In one trial (399 participants), effects on prevalence of all-cause diarrhoea  
51 favoured zinc with iron, but this was not significant (RR 0.90 [0.79 to 1.06]). Five trials (1329  
52 participants) reported no difference in height (SMD 0.06 [-0.04 to 0.16]). There was similarly low  
53 quality evidence and mixed results for other outcomes (Table 3).

### 53 **Additional subgroup analyses**

54 Studies in high-income countries did not evaluate most outcomes, so we were unable to explore  
55 differences in effect by national income. Effects on weight and weight-to-height ratio were not  
56 statistically different, and there was no evidence of consistent differences in biological outcomes  
57 (Appendix 6).  
58  
59  
60



1 Most studies included both stunted and non-stunted children, and it was not possible to compare  
2 effects between studies for most outcomes. Differences between groups were not significant for  
3 growth, but these would be consistent with larger effects in studies of stunted children.  
4

5 Age was not significantly associated with effects on mortality or incidence diarrhoea, but results  
6 would be consistent with greater benefits in children over 1 year of age (Figure 3). Effects on weight  
7 were greatest in studies of older children, and there was a similar pattern for height, though the largest  
8 study of children over 5 years of age included only 804 participants. The effect of supplementation on  
9 zinc deficiency was greater in studies of older children, as was the negative effect on copper. There  
10 was no evidence of consistent differences in other biological outcomes.

11 Dose was not significantly associated with effects on mortality, incidence of LRTI, haemoglobin, or  
12 weight-to-height ratio. The pattern of results was inconsistent for incidence and prevalence of  
13 diarrhoea, height, weight, and plasma ferritin (Appendix 6). Subgroups were significantly different for  
14 serum zinc, prevalence of zinc deficiency, prevalence of iron deficiency, and plasma copper; only  
15 these results are consistent with a dose-response relationship.  
16

17 Duration of supplementation was not significantly associated with effects on mortality, incidence of  
18 diarrhoea, incidence of LRTI, or weight-to-height ratio, or prevalence of iron deficiency (Appendix  
19 6). There was a significant difference for prevalence of diarrhoea, but the magnitude of this difference  
20 may not be important. Studies of longer supplementation were associated with greater effects on  
21 height; the pattern of results was not consistent for weight. By contrast, the largest benefits for  
22 biological markers (serum zinc and prevalence of zinc deficiency) were reported in the shortest  
23 studies.  
24

25 Formulation was associated with differences among subgroups, though few studies included capsules  
26 or powder. Comparing solution and tablets, differences were not significant for mortality, incidence  
27 and prevalence of diarrhoea, incidence of LRTI, blood haemoglobin, prevalence of anaemia, or  
28 prevalence of iron deficiency. There were significant differences in the effects of serum ferritin and  
29 serum copper, but only three studies of each outcome used tablets, and they were highly  
30 heterogeneous. Effects on height, weight, and serum zinc were greater in studies using solution  
31 compared with tablet, but all effects were small (Appendix 6).

### 32 Reporting bias

33 For outcomes included in the Summary of Findings Table with 10 or more studies, we also conducted  
34 a trim-and-fill analysis to investigate reporting bias (Appendix 8).<sup>23</sup> There was some evidence of small  
35 study bias—studies were trimmed for all-cause mortality (1 trimmed) and incidence of all-cause  
36 diarrhoea (13 trimmed; Figure 6). None were trimmed for incidence of LRTI, nor were any trimmed  
37 for height. The adjusted effect for mortality was not importantly different from the observed effect,  
38 but the observed effect for diarrhoea (RR 0.87 [0.85 to 0.89]) was larger than the adjusted value (RR  
39 0.95 [0.93 to 0.97]).

## 40 DISCUSSION

41 Consistent with previous reviews, this review finds high quality evidence from several large, well-  
42 conducted trials.<sup>5,7,10</sup> We believe that these results suggest zinc supplementation is probably  
43 associated with a small reduction in all-cause mortality for children at risk of deficiency. In  
44 interpreting these results, we considered that the results of this meta-analysis are drawn from 13 trials  
45 including almost 140,000 participants. The results of those studies are statistically consistent, the  
46 overall confidence intervals are relatively small, and the balance of probability favours zinc  
47 supplementation rather than placebo. Small reductions in cause-specific mortality were consistent  
48 with effects on illness and cause-specific mortality, and the results were biologically plausible.  
49 Benefits in any specific are may be related to level of deficiency; countries with very high levels of  
50 deficiency could expect the largest reductions in mortality as a result of supplementation.<sup>24</sup> This  
51 review also suggests that benefits may not be restricted to young children; there is some evidence of  
52 benefits on secondary outcomes in trials including children over 5 years of age, but there is a lack of  
53 evidence about effects on mortality in this group.

54 Results for secondary outcomes suggest modest benefits. Main results for diarrhoea morbidity were  
55 consistent with previous reviews,<sup>4,5,7,10</sup> but an asymmetrical funnel plot was indicative of small-study  
56 bias. After adjustment, the effect for diarrhoea was halved, and the reduced estimate was consistent  
57 with other critical outcomes in this review. Previous reviews have also suggested beneficial effects on  
58 respiratory infections<sup>4,5,9-12</sup> and malaria,<sup>10</sup> which this review does not confirm. Previous reviews have  
59 reported variable effects on growth;<sup>5,6,8</sup> this review suggests that preventive zinc supplementation  
60

1 alone is unlikely to have large effects on linear growth and morbidity. Supplementation is associated  
2 with increased risk of vomiting, but there is no evidence of lasting adverse effects.  
3

4 Critical outcomes included data for 2407 to 138302 participants, so further placebo-controlled trials of  
5 preventive zinc supplementation for young children may not be necessary. However, subgroup  
6 analyses did not identify an optimal supplementation strategy (i.e. dose, formulation, and frequency),  
7 and large trials comparing active interventions could inform clinical guidelines. Subgroup analyses  
8 identify some sources of observed heterogeneity; however, subgroups that were statistically different  
9 included a large amount of residual heterogeneity, which is reflected in our judgements about the  
10 quality of the evidence (Table 1). Analyses of group-level data are of limited value for identifying  
11 moderators, particularly in analyses dominated by a few large studies. Further analyses of individual  
12 patient data would be more conclusive.

13 Effects on biological indicators were inconsistent across studies, but large effects on these measures  
14 were not always reflected in clinical outcomes. Supplementation may increase serum zinc, but the  
15 magnitude of the effect appears to differ across populations and interventions. Effects on other  
16 micronutrients, including iron and copper, are uncertain. Researchers have suggested that iron  
17 supplementation may interfere with the absorption of zinc and, conversely, that zinc may interfere  
18 with iron and copper absorption;<sup>25,26</sup> however, the relationships between these biomarkers and clinical  
19 outcomes (i.e. mortality and morbidities) have not been established.

20 Subgroup analyses comparing zinc with and without iron did not resolve uncertainty about the effect  
21 of co-supplementation. Only four studies with iron co-supplementation reported mortality outcomes,  
22 and evidence of outcome reporting bias for diarrhoea incidence leads to cautious interpretation of  
23 differences in this outcome. There was no evidence that larger doses or increased duration were  
24 associated with increased iron deficiency, but these comparisons are observational and could be  
25 affected by uncontrolled covariates.  
26

27 Direct comparisons within trials provide the only experimental evidence about the effects of co-  
28 supplementation with iron. For rare events like mortality, effects of zinc and iron can only be detected  
29 in large studies, so studies of interaction effects will need to be very large to detect real differences.  
30 Future studies are needed to identify main effects and to explore how administration (i.e. separate or  
31 combined) affects uptake and costs.

32 Dietary intake and supplementation have reduced micronutrient deficiencies in Asia, but  
33 micronutrient deficiencies remain common.<sup>3,27</sup> The prevalence of micronutrient deficiencies is  
34 declining in Africa, but the absolute number of deficient children is increasing.<sup>3</sup> This review suggests  
35 that the overall benefits of preventive zinc supplementation outweigh potential harms in areas with a  
36 high risk of zinc deficiency. Further research is needed to determine if these benefits extend to  
37 children over 5 years of age. Current estimates suggest that delivering 10 evidence-based nutrition-  
38 specific interventions, including preventive zinc supplements, could reduce global mortality in  
39 children under 5 years of age by 15%.<sup>28</sup> To that end, research is needed to identify the most effective  
40 strategies for delivering zinc supplements to populations in need.<sup>29</sup>  
41  
42  
43  
44  
45  
46  
47  
48  
49  
50  
51  
52  
53  
54  
55  
56  
57  
58  
59  
60

## Acknowledgements

We thank the Cochrane Developmental Psychosocial and Learning Problems Group, particularly: Margaret Anderson helped develop and conduct the searches; Laura MacDonald, Joanne Wilson, and Geraldine Macdonald assisted with the preparation of the protocol and review; Geraldine Macdonald provided detailed comments on the protocol and completed review. The Cochrane Methods Group provided statistical advice and assistance. Chris Champion extracted one study in Portuguese. Evelyn S Chan, Xin Hui Chan, Jai Das, and Aneil Jaswal extracted study data.

## Contributors

All authors contributed to the background. EMW and JJ were responsible for the methods. JJ executed the first literature search, and EMW and AI executed the update. JJ, EMW, AI, and EC reviewed citations for inclusion. JJ, EMW, AI, SD, XHC, and AJ extracted data. JJ and EMW entered outcome data into RevMan and analysed the data. EMW, JJ, and AI wrote the results and discussion. EMW and AI drafted the summary of findings table, which was agreed on by all authors. ZB contributed to the writing and interpretation of findings. EMW is the guarantor.

## Funding

No funding bodies had any role in study design, data collection and analysis, decision to publish, or preparation of the manuscript. We received internal support from the Department of Epidemiology, Johns Hopkins Bloomberg School of Public Health (US); Centre for Outcomes Research and Effectiveness (CORE), Research Department of Clinical, Educational & Health Psychology, University College London (UK); the Centre for Evidence Based Intervention, Department of Social Policy and Intervention, University of Oxford (UK); and the Division of Women and Child Health, Aga Khan University Hospital (PK).

## Competing interests

All authors have completed the ICMJE uniform disclosure form at [www.icmje.org/coi\\_disclosure.pdf](http://www.icmje.org/coi_disclosure.pdf) (available on request from the corresponding author) and declare: no support from any organisation for the submitted work; no financial relationships with any organisations that might have an interest in the submitted work in the previous three years. ZAB is an author of some of the included trials. ZAB and AI have published previous reviews about zinc.

## Ethical approval

Not required.

## Data sharing

Data are provided in the appendices and available from the authors upon request.

## APPENDICES

- Appendix 1: Electronic searches
- Appendix 2: Excluded studies
- Appendix 3: On-going studies
- Appendix 4: Included studies
- Appendix 5: Risk of bias
- Appendix 6: Subgroup analyses
- Appendix 7: Additional forest plots
- Appendix 8: Tests for reporting bias

1  
2  
3  
4  
5  
6  
7  
8  
9  
10  
11  
12  
13  
14  
15  
16  
17  
18  
19  
20  
21  
22  
23  
24  
25  
26  
27  
28  
29  
30  
31  
32  
33  
34  
35  
36  
37  
38  
39  
40  
41  
42  
43  
44  
45  
46  
47  
48  
49  
50  
51  
52  
53  
54  
55  
56  
57  
58  
59  
60

Figure legends

**Figure 1: PRISMA flowchart**

**Figure 2: Risk of bias summary**

**Figure 3: All-cause mortality by age**

**Figure 4: Incidence of all cause diarrhoea with and without iron co-supplementation**

**Figure 5: Height**

**Figure 6: Incidence of diarrhoea funnel plot (trim-and-fill analysis)**

For peer review only

## REFERENCES

1. Hotz C BK. International Zinc Nutrition Consultative Group (IZiNCG). Assessment of the risk of zinc deficiency in populations and options for its control. *Food and Nutrition Bulletin*. 2004; **25**((1 Suppl 2)): S94-203.
2. Maggini S, Wenzlaff S, Hornig D. Essential role of vitamin C and zinc in child immunity and health. *The Journal of international medical research*. 2010; **38**(2): 386-414.
3. Black RE, Victora CG, Walker SP, et al. Maternal and child undernutrition and overweight in low-income and middle-income countries. *Lancet*. 2013; **382**(9890): 427-51.
4. Aggarwal R, Sentz J, Miller MA. Role of zinc administration in prevention of childhood diarrhea and respiratory illnesses: a meta-analysis. *Pediatrics*. 2007; **119**(6): 1120-30.
5. Brown KH PJ, Baker SK, Hess SY. Preventive zinc supplementation among infants, preschoolers, and older prepubertal children. *Food and Nutrition Bulletin*. 2009; **30**(1): S12-40.
6. Imdad A, Bhutta ZA. Effect of preventive zinc supplementation on linear growth in children under 5 years of age in developing countries: a meta-analysis of studies for input to the lives saved tool. *BMC Public Health*. 2011; **11 Suppl 3**: S22.
7. Patel A MM, Badhoniya N, Kulkarni H. What zinc supplementation does and does not achieve in diarrhea prevention: a systematic review and meta-analysis. *BMC Infectious Diseases* 2011; (11): 122.
8. Ramakrishnan U, Nguyen P, Martorell R. Effects of micronutrients on growth of children under 5 y of age: meta-analyses of single and multiple nutrient interventions. *American Journal of Clinical Nutrition*. 2009; **89**(1): 191-203.
9. Roth DE, Richard SA, Black RE. Zinc supplementation for the prevention of acute lower respiratory infection in children in developing countries: meta-analysis and meta-regression of randomized trials. *International Journal of Epidemiology*. 2010; **39**(3): 795-808.
10. Yakoob MY, Theodoratou E, Jabeen A, et al. Preventive zinc supplementation in developing countries: impact on mortality and morbidity due to diarrhea, pneumonia and malaria. (Special Issue: Technical inputs, enhancements and applications of the Lives Saved Tool (LiST)). *BMC Public Health*. 2011; **11**(Suppl. 3): S23.
11. Bhutta ZA, Black RE, Brown KH, et al. Prevention of diarrhea and pneumonia by zinc supplementation in children in developing countries: pooled analysis of randomized controlled trials. Zinc Investigators' Collaborative Group. *Journal of Pediatrics*. 1999; **135**(6): 689-97.
12. Lassi ZS, Haider BA, Bhutta ZA. Zinc supplementation for the prevention of pneumonia in children aged 2 months to 59 months. *Cochrane Database of Systematic Reviews*. 2010; (12): CD005978.
13. Pasricha S-R, Hayes E, Kalumba K, et al. Effect of daily iron supplementation on health in children aged 4–23 months: a systematic review and meta-analysis of randomised controlled trials. *The Lancet Global Health*. 2013; **1**(2): e77-86.
14. Junior JA, Dean S, Mayo-Wilson E, et al. Zinc supplementation for preventing mortality and morbidity, and promoting growth, in children aged 6 months to 12 years of age (Protocol). *Cochrane Database of Systematic Reviews*. 2011; **10**: Art. No.: CD009384. DOI: 10.1002/14651858.CD009384.
15. Higgins JP, Green S. *Cochrane Handbook for Systematic Reviews of Interventions*. Version 5.1.0 [updated March 2011]: The Cochrane Collaboration; 2011.
16. Balshem H, Helfand M, Schunemann HJ, et al. GRADE guidelines: 3. Rating the quality of evidence. *Journal of Clinical Epidemiology*. 2011; **64**(4): 401-6.
17. Bhandari N, Taneja S, Mazumder S, et al. Adding zinc to supplemental iron and folic acid does not affect mortality and severe morbidity in young children. *Journal of Nutrition*. 2007; **137**(1): 112-7.
18. Sazawal S, Black RE, Ramsan M, et al. Effects of routine prophylactic supplementation with iron and folic acid on admission to hospital and mortality in preschool children in a high malaria transmission setting: community-based, randomised, placebo-controlled trial.[Erratum appears in *Lancet*. 2006 Jan 28;367(9507):302]. *Lancet*. 2006; **367**(9505): 133-43.

- 1 19. Tielsch JM, Khattry SK, Stoltzfus RJ, et al. Effect of routine prophylactic  
2 supplementation with iron and folic acid on preschool child mortality in southern Nepal:  
3 community-based, cluster-randomised, placebo-controlled trial. *Lancet*. 2006; **367**(9505):  
4 144-52.
- 5 20. Sempertegui F, Estrella B, Correa E, et al. Effects of short-term zinc supplementation  
6 on cellular immunity, respiratory symptoms, and growth of malnourished Equadorian  
7 children. *European Journal of Clinical Nutrition*. 1996; **50**(1): 42-6.
- 8 21. Alarcon K, Kolsteren PW, Prada AM, et al. Effects of separate delivery of zinc or zinc  
9 and vitamin A on hemoglobin response, growth, and diarrhea in young Peruvian children  
10 receiving iron therapy for anemia. *American Journal of Clinical Nutrition*. 2004; **80**(5):  
11 1276-82.
- 12 22. Mazariegos M, Hambidge KM, Westcott JE, et al. Neither a zinc supplement nor  
13 phytate-reduced maize nor their combination enhance growth of 6- to 12-month-old  
14 Guatemalan infants. *Journal of Nutrition*. 2010; **140**(5): 1041-8.
- 15 23. Duval S, Tweedie R. Trim and fill: A simple funnel-plot-based method of testing and  
16 adjusting for publication bias in meta-analysis. *Biometrics*. 2000; **56**(2): 455-63.
- 17 24. Wessells KR, Brown KH. Estimating the global prevalence of zinc deficiency: results  
18 based on zinc availability in national food supplies and the prevalence of stunting. *PLoS*  
19 *ONE*. 2012; **7**(11): e50568.
- 20 25. Maret W, Sandstead HH. Zinc requirements and the risks and benefits of zinc  
21 supplementation. *J Trace Elem Med Biol*. 2006; **20**(1): 3-18.
- 22 26. Sandstrom B. Micronutrient interactions: effects on absorption and bioavailability. *The*  
23 *British journal of nutrition*. 2001; **85 Suppl 2**: S181-5.
- 24 27. Ram U, Jha P, Ram F, et al. Neonatal, 1–59 month, and under-5 mortality in 597  
25 Indian districts, 2001 to 2012: estimates from national demographic and mortality surveys.  
26 *The Lancet Global Health*. 2013; **Online first**.
- 27 28. Bhutta ZA, Das JK, Rizvi A, et al. Evidence-based interventions for improvement of  
28 maternal and child nutrition: what can be done and at what cost? *Lancet*. 2013; **382**(9890):  
29 452-77.
- 30 29. Wazny K, Zipursky A, Black R, et al. Setting research priorities to reduce mortality  
31 and morbidity of childhood diarrhoeal disease in the next 15 years. *PLoS Medicine*. 2013;  
32 **10**(5): e1001446.
- 33  
34  
35  
36  
37  
38  
39  
40  
41  
42  
43  
44  
45  
46  
47  
48  
49  
50  
51  
52  
53  
54  
55  
56  
57  
58  
59  
60

**Table 1: Summary of findings**

| Outcomes                                                          | Illustrative comparative risks* (95% CI)            |                                                                                       | Relative effect (95% CI)   | No of Participants (studies) | Quality of the evidence (GRADE) |
|-------------------------------------------------------------------|-----------------------------------------------------|---------------------------------------------------------------------------------------|----------------------------|------------------------------|---------------------------------|
|                                                                   | Assumed risk                                        | Corresponding risk                                                                    |                            |                              |                                 |
|                                                                   | Control                                             | Zinc                                                                                  |                            |                              |                                 |
| All-cause mortality<br>Follow-up: 17 to 72 weeks                  | Low<br>2,400 per 1,000,000                          | 2,280 per 1,000,000<br>(2,064 to 2,520)                                               | RR 0.95<br>(0.86 to 1.05)  | 138,302<br>(13 studies)      | ⊕⊕⊕⊕<br>high                    |
|                                                                   | High<br>34,900 per 1,000,000                        | 33,155 per 1,000,000<br>(30,014 to 36,645)                                            |                            |                              |                                 |
| Mortality due to all-cause diarrhoea<br>Follow-up: 52 to 69 weeks | Low<br>800 per 1,000,000                            | 760 per 1,000,000<br>(552 to 1,048)                                                   | RR .95<br>(0.69 to 1.31)   | 132,321<br>(4 studies)       | ⊕⊕⊕⊖<br>moderate <sup>1</sup>   |
|                                                                   | High<br>3,000 per 1,000,000                         | 2,850 per 1,000,000<br>(2,070 to 3,930)                                               |                            |                              |                                 |
| Mortality due to LRTI<br>Follow-up: 52 to 69 weeks                | Low<br>1,200 per 1,000,000                          | 1,032 per 1,000,000<br>(768 to 1,380)                                                 | RR 0.86<br>(0.64 to 1.15)  | 132,063<br>(3 studies)       | ⊕⊕⊕⊖<br>moderate <sup>1</sup>   |
|                                                                   | High<br>3,000 per 1,000,000                         | 2,580 per 1,000,000<br>(1,920 to 3,450)                                               |                            |                              |                                 |
| Mortality due to malaria<br>Follow-up: 46 to 69 weeks             | Low<br>7,400 per 1,000,000                          | 6,660 per 1,000,000<br>(5,698 to 7,844)                                               | RR 0.90<br>(0.77 to 1.06)  | 42,818<br>(2 study)          | ⊕⊕⊕⊖<br>moderate <sup>1</sup>   |
|                                                                   | High<br>14,200 per 1,000,000                        | 12,780 per 1,000,000<br>(10,934 to 15,052)                                            |                            |                              |                                 |
| Incidence of all-cause diarrhoea<br>Follow-up: 12 to 72 weeks     | Low<br>20,000 per 1,000,000                         | 17,400 per 1,000,000<br>(17,000 to 17,800)                                            | RR 0.87<br>(0.85 to 0.89)  | 15,042<br>(35 studies)       | ⊕⊕⊕⊖<br>low <sup>2,3</sup>      |
|                                                                   | High<br>1,770,000 per 1,000,000                     | 1,539,900 per 1,000,000<br>(1,504,500 to 1,575,300)                                   |                            |                              |                                 |
| Incidence of LRTI<br>Follow-up: 12 to 52 weeks                    | Low<br>30,000 per 1,000,000                         | 30,000 per 1,000,000<br>(28,200 to 32,100)                                            | RR 1.00<br>(0.94 to 1.07)  | 9,610<br>(12 studies)        | ⊕⊕⊕⊕<br>high                    |
|                                                                   | High<br>370,000 per 1,000,000                       | 370,000 per 1,000,000<br>(347,800 to 395,900)                                         |                            |                              |                                 |
| Incidence of malaria<br>Follow-up: 24 to 47 weeks                 | Low<br>140,000 per 1,000,000                        | 147,000 per 1,000,000<br>(133,000 to 161,000)                                         | RR 1.05<br>(0.95 to 1.15)  | 2,407<br>(4 studies)         | ⊕⊕⊕⊖<br>moderate <sup>4</sup>   |
|                                                                   | High<br>2,950,000 per 1,000,000                     | 3,097,500 per 1,000,000<br>(2,802,500 to 3,392,500)                                   |                            |                              |                                 |
| Height<br>Follow-up: 10 to 60 weeks                               | The mean height in the control groups was<br>-1 HAZ | The mean height in the intervention groups was<br>0.1 HAZ better<br>(0 to 0.2 better) | SMD 0.09<br>(0.06 to 0.13) | 13,669<br>(51 studies)       | ⊕⊕⊕⊖<br>moderate <sup>5</sup>   |
| Participants with 1 vomiting episode<br>Follow-up: 24 to 52 weeks | Low<br>17,500 per 1,000,000                         | 22,575 per 1,000,000<br>(19,950 to 25,550)                                            | RR 1.29<br>(1.14 to 1.46)  | 35,192<br>(4 studies)        | ⊕⊕⊕⊕<br>high                    |
|                                                                   | High<br>300,600 per 1,000,000                       | 387,774 per 1,000,000<br>(342,684 to 438,876)                                         |                            |                              |                                 |

\*The basis for the assumed risk (e.g. the median control group risk across studies) is provided in footnotes. The corresponding risk (and its 95% confidence interval) is based on the assumed risk in the comparison group and the relative effect of the intervention (and its 95% CI).

CI: Confidence interval; RR: Risk ratio; SMD: Standardised Mean Difference

---

GRADE Working Group grades of evidence  
High quality: Further research is very unlikely to change our confidence in the estimate of effect.  
Moderate quality: Further research is likely to have an important impact on our confidence in the estimate of effect and may change the estimate.  
Low quality: Further research is very likely to have an important impact on our confidence in the estimate of effect and is likely to change the estimate.  
Very low quality: We are very uncertain about the estimate.

Footnotes

<sup>1</sup> Few deaths observed overall.

<sup>2</sup> I<sup>2</sup>=88%

<sup>3</sup> Trim and fill analysis suggests the effect may be overestimated due to publication bias.

<sup>4</sup> I<sup>2</sup>=44%

<sup>5</sup> I<sup>2</sup>=86%

For peer review only



Table 2: Zinc compared with no zinc (all outcomes)

| Outcomes                                 | Trials   | People       | ES (95% CI), fixed effects | Heterogeneity<br>I <sup>2</sup> ; Chi <sup>2</sup> (p value) |
|------------------------------------------|----------|--------------|----------------------------|--------------------------------------------------------------|
| <b>ZINC VERSUS NO ZINC</b>               |          |              |                            |                                                              |
| <b>Mortality</b>                         |          |              |                            |                                                              |
| All-cause                                | 13 (16%) | 138302 (67%) | Risk=0.95 (0.86 to 1.05)   | 0%; 10.57 (p=0.65)                                           |
| Due to diarrhoea                         | 4 (5%)   | 132321 (64%) | Risk=0.95 (0.69 to 1.31)   | 0%; 0.82 (p=0.84)                                            |
| Due to LRTI                              | 3 (4%)   | 132063 (64%) | Risk=0.86 (0.64 to 1.15)   | 0%; 0.07 (p=0.96)                                            |
| Due to malaria                           | 2 (3%)   | 42818 (21%)  | Risk=0.90 (0.77 to 1.06)   | 0%; 0.01 (p=0.94)                                            |
| <b>Hospitalisation</b>                   |          |              |                            |                                                              |
| All-cause                                | 7 (9%)   | 92872 (45%)  | Risk=1.04 (0.97 to 1.11)   | 44%; 14.41 (p=0.07)                                          |
| Due to diarrhoea                         | 4 (5%)   | 74039 (36%)  | Risk=1.03 (0.87 to 1.22)   | 42%; 6.91 (p=0.14)                                           |
| Due to LRTI                              | 3 (4%)   | 74743 (36%)  | Risk=1.10 (0.93 to 1.30)   | 0%; 0.35 (p=0.95)                                            |
| <b>Diarrhoea</b>                         |          |              |                            |                                                              |
| Incidence (all cause)                    | 35 (44%) | 15042 (7%)   | Risk=0.87 (0.85 to 0.89)   | 88%; 295.56 (p<0.00001)                                      |
| Prevalence (all cause)                   | 13 (16%) | 8519 (4%)    | Rate=0.88 (0.86 to 0.90)   | 88%; 118.88 (p<0.00001)                                      |
| Incidence (severe)                       | 5 (6%)   | 4982 (2%)    | Risk=0.89 (0.84 to 0.95)   | 56%; 13.54 (p=0.04)                                          |
| Incidence (persistent)                   | 7 (9%)   | 6216 (3%)    | Risk=0.73 (0.62 to 0.85)   | 61%; 20.47 (p=0.009)                                         |
| Prevalence (persistent)                  | 1 (1%)   | 666 (0%)     | Rate=0.70 (0.64 to 0.76)   | 91%; 11.76 (p=0.0006)                                        |
| <b>Lower respiratory tract infection</b> |          |              |                            |                                                              |
| Incidence                                | 12 (15%) | 9610 (5%)    | Risk=1.00 (0.94 to 1.07)   | 1%; 17.16 (p=0.44)                                           |
| Prevalence                               | 3 (4%)   | 1955 (1%)    | Rate=1.20 (1.10 to 1.30)   | 97%; 89.87 (p<0.00001)                                       |
| <b>Malaria</b>                           |          |              |                            |                                                              |
| Incidence                                | 4 (5%)   | 2407 (1%)    | Risk=1.05 (0.95 to 1.15)   | 0%; 2.04 (p=0.84)                                            |
| Prevalence                               | 1 (1%)   | 661 (0%)     | Rate=0.88 (0.47 to 1.64)   | Not applicable                                               |
| <b>Growth</b>                            |          |              |                            |                                                              |
| Height                                   | 51 (64%) | 13669 (7%)   | SMD=0.09 (0.06 to 0.13)    | 86%; 407.92 (p<0.00001)                                      |
| Weight                                   | 44 (55%) | 12305 (6%)   | SMD=0.10 (0.07 to 0.14)    | 76%; 216.64 (p<0.00001)                                      |
| Weight-to-height ratio                   | 24 (30%) | 7901 (4%)    | SMD=0.05 (0.01 to 0.10)    | 20%; 34.96 (p=0.17)                                          |
| Prevalence of stunting                   | 6 (8%)   | 3838 (2%)    | Risk=0.94 (0.86 to 1.02)   | 59%; 19.43 (p=0.01)                                          |
| <b>Adverse events</b>                    |          |              |                            |                                                              |
| Participants with 1 AE                   | 2 (3%)   | 850 (0%)     | SMD=1.13 (1.00 to 1.27)    | 0%; 0.49 (p=0.78)                                            |
| Study withdrawal                         | 6 (8%)   | 4263 (2%)    | Risk=1.75 (0.93 to 3.32)   | 21%; 5.07 (p=0.28)                                           |
| Vomiting (incidence)                     | 5 (6%)   | 4095 (2%)    | Risk=1.68 (1.61 to 1.75)   | 85%; 34.28 (p<0.00001)                                       |
| Vomiting (prevalence)                    | 4 (5%)   | 35192 (17%)  | Rate=1.29 (1.14 to 1.46)   | 37%; 6.31 (p=0.18)                                           |
| <b>Biological indicators</b>             |          |              |                            |                                                              |
| Zn concentration                         | 46 (58%) | 9810 (5%)    | SMD=0.62 (0.58 to 0.67)    | 91%; 582.45 (p<0.00001)                                      |
| Zn deficiency (prevalence)               | 15 (19%) | 5434 (3%)    | Risk=0.49 (0.45 to 0.53)   | 86%; 144.77 (p<0.00001)                                      |
| Haemoglobin concentration                | 27 (34%) | 6024 (3%)    | SMD=-0.05 (-0.10 to 0.00)  | 45%; 63.96 (p=0.002)                                         |
| Anemia (prevalence)                      | 13 (16%) | 4287 (2%)    | Risk=1.00 (0.95 to 1.06)   | 37%; 28.52 (p=0.05)                                          |
| Fe concentration                         | 19 (24%) | 4474 (2%)    | SMD=0.07 (0.00 to 0.13)    | 95%; 480.50 (p<0.00001)                                      |
| Fe deficiency (prevalence)               | 10 (13%) | 3149 (2%)    | Risk=0.99 (0.89 to 1.10)   | 15%; 16.44 (p=0.29)                                          |
| Cu concentration                         | 11 (14%) | 3071 (1%)    | SMD=-0.22 (-0.29 to 0.14)  | 68%; 37.47 (p=0.0002)                                        |
| Cu deficiency (prevalence)               | 3 (4%)   | 1337 (1%)    | Risk=2.64 (1.28 to 5.42)   | 59%; 4.94 (p=0.08)                                           |

Table 3: Zinc with iron compared with zinc alone (all outcomes)

| Outcomes                                 | Trials   | People     | ES (95% CI), fixed effects | Heterogeneity<br>I <sup>2</sup> ; Chi <sup>2</sup> (p value) |
|------------------------------------------|----------|------------|----------------------------|--------------------------------------------------------------|
| <b>All cause mortality</b>               | 1 (13%)  | 323 (17%)  | Risk=0.33 (0.01 to 8.31)   | Not applicable                                               |
| <b>Hospitalisation</b>                   |          |            |                            |                                                              |
| All-cause                                | 1 (13%)  | 399 (21%)  | Risk=0.92 (0.45 to 1.89)   | Not applicable                                               |
| Due to diarrhoea                         | 1 (13%)  | 399 (21%)  | Risk=0.99 (0.25 to 3.88)   | Not applicable                                               |
| <b>Diarrhoea</b>                         |          |            |                            |                                                              |
| Incidence (all cause)                    | 5 (63%)  | 1530 (81%) | Risk=1.10 (1.03 to 1.18)   | 76%; 16.92 (p=0.002)                                         |
| Prevalence (all cause)                   | 1 (13%)  | 399 (21%)  | Rate=0.90 (0.79 to 1.06)   | Not applicable                                               |
| Incidence (severe)                       | 1 (13%)  | 323 (17%)  | Rate=0.78 (0.59 to 1.04)   | Not applicable                                               |
| <b>Lower respiratory tract infection</b> |          |            |                            |                                                              |
| Incidence                                | 3 (38%)  | 1065 (56%) | Risk=0.93 (0.83 to 1.04)   | 21%; 2.52 (p=0.28)                                           |
| <b>Malaria</b>                           |          |            |                            |                                                              |
| Incidence                                | 1 (13%)  | 410 (22%)  | Rate=0.86 (0.59 to 1.24)   | Not applicable                                               |
| <b>Growth</b>                            |          |            |                            |                                                              |
| Height                                   | 5 (63%)  | 1517 (80%) | SMD=0.06 (-0.04 to 0.16)   | 0%; 3.54 (p=0.47)                                            |
| Weight                                   | 4 (50%)  | 910 (48%)  | SMD=0.12 (-0.01 to 0.25)   | 0%; 2.29 (p=0.51)                                            |
| Weight-to-height ratio                   | 4 (50%)  | 514 (27%)  | SMD=-0.06 (-0.07 to 0.19)  | 0%; 1.36 (p=0.71)                                            |
| Prevalence of stunting                   | 2 (25%)  | 462 (24%)  | Risk=0.92 (0.85 to 0.99)   | 45%; 1.82 (p=0.18)                                           |
| <b>Adverse events</b>                    |          |            |                            |                                                              |
| Study withdrawal                         | 2 (25%)  | 557 (29%)  | Risk=1.41 (0.91 to 2.18)   | 0%; 0.08 (p=0.78)                                            |
| <b>Biological indicators</b>             |          |            |                            |                                                              |
| Zn concentration                         | 8 (100%) | 1337 (70%) | SMD=0.16 (0.05 to 0.27)    | 61%; 17.84 (p=0.01)                                          |
| Zn deficiency (prevalence)               | 3 (38%)  | 350 (18%)  | Risk =1.42 (0.75 to 2.68)  | 5%; 2.10 (p=0.35)                                            |
| Haemoglobin concentration                | 8 (100%) | 1341 (71%) | SMD=-0.23 (-0.34 to -0.12) | 79%; 33.53 (p<0.0001)                                        |
| Anemia (prevalence)                      | 3 (38%)  | 482 (25%)  | Risk=0.78 (0.67 to 0.92)   | 0%; 1.25 (p=0.54)                                            |
| Fe concentration                         | 6 (75%)  | 945 (50%)  | SMD=-1.79 (-1.99 to -1.56) | 99%; 927.92 (p<0.00001)                                      |
| Fe deficiency (prevalence)               | 2 (25%)  | 248 (13%)  | Risk =0.12 (0.04 to 0.32)  | 87%; 8.00 (p=0.005)                                          |
| Cu concentration                         | 2 (25%)  | 353 (19%)  | SMD=-0.06 (-0.27 to 0.15)  | 0%; 0.11 (p=0.74)                                            |

Rate ratio (Rate); Risk ratio (Risk); Odds Ratio (Odds); Standardised Mean Difference (SMD)

Zinc (Zn); Iron (Fe); Copper (Cu).

Effects favour intervention (i.e. zinc rather than iron; zinc plus iron rather than zinc alone) when the relative risk is reduced (RR<1) or the standardised difference is positive (SMD>0).

**Table 4: Subgroup analyses**

| Subgroup                                                                                 | Trials    | People        | Risk Ratio (95% CI), fixed | I <sup>2</sup> ; Chi <sup>2</sup> (p value) |
|------------------------------------------------------------------------------------------|-----------|---------------|----------------------------|---------------------------------------------|
| <b>Mortality</b>                                                                         | <b>13</b> | <b>138302</b> | <b>0.95 (0.86 to 1.05)</b> | <b>0%; 10.57 (p=0.65)</b>                   |
| <i>Iron co-supplementation</i> (I <sup>2</sup> =23%; Chi <sup>2</sup> =1.30, p=0.25)     |           |               |                            |                                             |
| with iron                                                                                | 4         | 99242         | 0.99 (0.86 to 1.15)        | 0%; 0.76 (p=0.86)                           |
| without iron                                                                             | 11        | 64985         | 0.89 (0.79 to 1.00)        | 0%; 9.99 (p=0.44)                           |
| <i>Age</i> (I <sup>2</sup> =59.8%; Chi <sup>2</sup> =2.48, p=0.11)                       |           |               |                            |                                             |
| 6m to 1y                                                                                 | 6         | 29879         | 1.06 (0.88 to 1.27)        | 0%; 2.56 (p=0.77)                           |
| 1y to 5y                                                                                 | 8         | 125903        | 0.89 (0.80 to 0.99)        | 12%; 10.28 (p=0.33)                         |
| <i>Dose</i> (I <sup>2</sup> =0%; Chi <sup>2</sup> =2.64, p=0.45)                         |           |               |                            |                                             |
| 0mg to 5mg                                                                               | 2         | 717           | 0.72 (0.08 to 6.47)        | 29%; 1.41 (p=0.23)                          |
| 5mg to 10mg                                                                              | 1         | 274           | 3.04 (0.32 to 28.90)       | Not applicable                              |
| 10mg to 15mg                                                                             | 11        | 152062        | 0.93 (0.84 to 1.02)        | 0%; 8.16 (p=0.61)                           |
| 20mg or more                                                                             | 1         | 2464          | 0.14 (0.01 to 2.78)        | Not applicable                              |
| <i>Duration</i> (I <sup>2</sup> =0%; Chi <sup>2</sup> =1.20, p=0.55)                     |           |               |                            |                                             |
| 0m to 6m                                                                                 | 2         | 2817          | 0.59 (0.07 to 5.15)        | 47%; 1.88 (p=0.17)                          |
| 6m to 12m                                                                                | 7         | 3898          | 0.68 (0.37 to 1.25)        | 4%; 6.23 (p=0.40)                           |
| 12m or more                                                                              | 6         | 148802        | 0.93 (0.85 to 1.03)        | 0%; 2.91 (p=0.71)                           |
| <i>Formulation</i> (I <sup>2</sup> =0%; Chi <sup>2</sup> =0.54, p=0.91)                  |           |               |                            |                                             |
| Solution                                                                                 | 5         | 3639          | 0.99 (0.25 to 3.91)        | 15%; 4.68 (p=0.32)                          |
| Pill/ tablet                                                                             | 8         | 149854        | 0.93 (0.85 to 1.02)        | 0%; 6.99 (p=0.43)                           |
| Capsule                                                                                  | 1         | 306           | 0.51 (0.05 to 5.60)        | Not applicable                              |
| Powder                                                                                   | 1         | 1718          | 0.71 (0.27 to 1.86)        | Not applicable                              |
| <b>Incidence of diarrhoea</b>                                                            | <b>35</b> | <b>15042</b>  | <b>0.87 (0.85 to 0.89)</b> | <b>88%; 295.56 (p&lt;0.00001)</b>           |
| <i>Iron co-supplementation</i> (I <sup>2</sup> =99%; Chi <sup>2</sup> =65.11, p<0.00001) |           |               |                            |                                             |
| with iron                                                                                | 10        | 4299          | 1.00 (0.96 to 1.05)        | 76%; 37.33 (p<0.00001)                      |
| without iron                                                                             | 22        | 11344         | 0.82 (0.80 to 0.84)        | 87%; 196.27 (p<0.00001)                     |
| <i>Age</i> (I <sup>2</sup> =0%; Chi <sup>2</sup> =0.32, p=0.85)                          |           |               |                            |                                             |
| 6m to 1y                                                                                 | 10        | 5576          | 0.88 (0.85 to 0.90)        | 95%; 252.46 (p<0.00001)                     |
| 1y to 5y                                                                                 | 15        | 8370          | 0.87 (0.84 to 0.90)        | 43%; 31.48 (p=0.03)                         |
| 5y to 13y                                                                                | 1         | 842           | 0.90 (0.81 to 0.98)        | Not applicable                              |
| <i>Dose</i> (I <sup>2</sup> =98%; Chi <sup>2</sup> =195.69, p<0.00001)                   |           |               |                            |                                             |
| 0mg to 5mg                                                                               | 4         | 1784          | 0.95 (0.89 to 1.01)        | 73%; 22.46 (p=0.001)                        |
| 5mg to 10mg                                                                              | 6         | 2630          | 0.73 (0.64 to 0.83)        | 67%; 15.32 (p=0.009)                        |
| 10mg to 15mg                                                                             | 11        | 5452          | 0.96 (0.92 to 0.99)        | 69%; 38.39 (p=0.0001)                       |
| 15mg to 20mg                                                                             | 2         | 477           | 0.61 (0.58 to 0.65)        | 0%; 0.21 (p<0.00001)                        |
| 20mg or more                                                                             | 6         | 4931          | 0.90 (0.87 to 0.94)        | 75%; 28.17 (p<0.00001)                      |
| <i>Duration</i> (I <sup>2</sup> =0%; Chi <sup>2</sup> =1.15, p=0.56)                     |           |               |                            |                                             |
| 0m to 6m                                                                                 | 7         | 4190          | 0.89 (0.85 to 0.93)        | 57%; 16.42 (p=0.02)                         |
| 6m to 12m                                                                                | 14        | 8971          | 0.86 (0.84 to 0.89)        | 93%; 250.92 (p<0.00001)                     |
| 12m or more                                                                              | 5         | 1881          | 0.88 (0.82 to 0.95)        | 73%; 29.82 (p=0.0002)                       |
| <i>Formulation</i> (I <sup>2</sup> =94%; Chi <sup>2</sup> =51.34, p<0.00001)             |           |               |                            |                                             |
| Solution                                                                                 | 19        | 10768         | 0.84 (0.82 to 0.86)        | 90%; 236.48 (p<0.00001)                     |
| Pill/ tablet                                                                             | 3         | 1696          | 0.90 (0.81 to 0.99)        | 5%; 3.15 (p=0.37)                           |
| Capsule                                                                                  | 1         | 612           | 0.78 (0.60 to 1.01)        | Not applicable                              |
| Powder                                                                                   | 2         | 1861          | 1.04 (0.98 to 1.09)        | 0%; 0.65 (p=0.42)                           |

**Appendix 1: Electronic searches****MEDLINE**

1 zinc/ or zinc compounds/ or zinc oxide/ or zinc sulfate/ or zinc acetate/

2 (zinc or Zn).tw.

3 1 or 2

4 exp infant/ or exp child/ or adolescent/

5 (newborn\$ or neonat\$ or neo-nat\$ or infan\$ or baby or babies or toddler\$ or preschool\$ or pre-school\$ or pediatric\$ or paediatric\$ or child\$ or girl\$ or boy\$ or preteen\$ or pre-teen\$ or teen\$ or preadolescen\$ or pre-adolescenc\$ or adolescenc\$ or prepubert\$ or pre-pubert\$ or pubert\$).tw.

6 4 or 5

7 randomized controlled trial.pt.

8 controlled clinical trial.pt.

9 randomized.ab.

10 placebo.ab.

11 drug therapy.fs.

12 randomly.ab.

13 trial.ab.

14 groups.ab.

15 7 or 8 or 9 or 10 or 11 or 12 or 13 or 14

16 exp animals/ not humans.sh.

17 15 not 16

18 3 and 6 and 17

**Cochrane Central Register of Controlled Trials (CENTRAL)**

1 MeSH descriptor Zinc explode all trees

2 MeSH descriptor Zinc Compounds explode all trees

3 MeSH descriptor Zinc Oxide explode all trees

4 MeSH descriptor Zinc Sulfate explode all trees

5 MeSH descriptor Zinc Acetate explode all trees

6 (zinc):ti,ab,kw

7 (Zn):ti,ab,kw

8 (#1 OR #2 OR #3 OR #4 OR #5 OR #6 OR #7)

9 MeSH descriptor Infant explode all trees

10 MeSH descriptor Child explode all trees

11 MeSH descriptor Adolescent explode all trees

12 (newborn\* or neonat\* or (neo next nat\*) or infan\* or baby\* or babies or toddler\* or preschool\* or (pre next school\*) or pediatric\* or paediatric\* or child\* or girl\* or boy\* or preteen\* or (pre next teen\*) or teen\* or preadolescen\* or (pre next adolescenc\*) or adolescenc\* or prepubert\* or (pre next pubert\*) or pubert\*):ti,ab,kw

13 (#9 OR #10 OR #11 OR #12)

14 (#8 AND #13)

**MEDLINE In-Process & Other Non-Indexed Citations**

1 (zinc or Zn).tw.

2 (newborn\$ or neonat\$ or neo-nat\$ or infan\$ or baby or babies or toddler\$ or preschool\$ or pre-school\$ or pediatric\$ or paediatric\$ or child\$ or girl\$ or boy\$ or preteen\$ or pre-teen\$ or teen\$ or preadolescen\$ or pre-adolescenc\$ or adolescenc\$ or prepubert\$ or pre-pubert\$ or pubert\$).tw.

3 randomized controlled trial.pt.

4 controlled clinical trial.pt.

5 randomized.ab.

6 placebo.ab.

7 drug therapy.fs.

8 randomly.ab.

9 trial.ab.

10 groups.ab.

11 3 or 4 or 5 or 6 or 7 or 8 or 9 or 10

12 exp animals/ not humans.sh.

13 11 not 12

14 1 and 2 and 13

**EMBASE**

1 zinc/ or zinc derivative/ or zinc oxide/ or zinc sulfate/ or zinc acetate/

2 (zinc or Zn).tw.

3 1 or 2

4 exp infant/ or exp child/ or exp adolescent/

5 (newborn\$ or neonat\$ or neo-nat\$ or infan\$ or baby or babies or toddler\$ or preschool\$ or pre-school\$ or pediatric\$ or paediatric\$ or child\$ or girl\$ or boy\$ or preteen\$ or pre-teen\$ or teen\$ or preadolescen\$ or pre-adolescenc\$ or adolescenc\$ or prepubert\$ or pre-pubert\$ or pubert\$).tw.

6 4 or 5

7 exp crossover-procedure/ or exp double-blind procedure/ or exp randomized controlled trial/ or exp single-blind procedure/

8 (random\$ or factorial\$ or crossover\$ or cross-over\$ or placebo\$ or (doubl\$ adj blind\$) or (singl\$ adj blind\$) or assign\$ or allocat\$ or volunteer\$).tw.

9 7 or 8

10 3 and 6 and 9

11 The terms in lines seven through eight are the same as those used by the UK Cochrane Centre to identify randomised controlled trials.

12 African Index Medicus

13 zinc or Zn [Key Word] or zinc or Zn [Title] or zinc or Zn [Descriptor]

14 Global Health

15 1 zinc/ or zinc sulfate/ or zinc oxide/

16 2 (zinc or Zn).tw.

17 3 1 or 2

18 4 exp infants/ or exp children/ or exp adolescents/

19 5 (newborn\$ or neonat\$ or neo-nat\$ or infan\$ or baby or babies or toddler\$ or preschool\$ or pre-school\$ or pediatric\$ or paediatric\$ or child\$ or girl\$ or boy\$ or preteen\$ or pre-teen\$ or teen\$ or preadolescen\$ or pre-adolescenc\$ or adolescenc\$ or prepubert\$ or pre-pubert\$ or pubert\$).tw.

20 6 4 or 5

21 7 (random\$ or control\$ or clinic\$ or trial\$ or placebo\$ or drug therap\$ or group\$ or crossover\$ or cross-over\$ or double-blind\$ or single-blind\$ or factorial\$ or assign\$ or allocat\$ or volunteer\$).af.

22 8 3 and 6 and 7

23 IndMED

24 zinc or Zn [Title] OR zinc or Zn [Keywords]

25 Latin American Caribbean Health Sciences Literature (LILACS)

26 (MH Infant OR MH Child OR MH Adolescent) OR (Tw newborn\$ OR Tw neonat\$ OR Tw neo-nat\$ OR Tw infan\$ OR Tw baby\$ OR Tw babies OR Tw toddler\$ OR Tw preschool\$ OR Tw pre-school\$ OR Tw pediatric\$ OR Tw paediatric\$ OR Tw child\$ OR Tw girl\$ OR Tw boy\$ OR Tw preteen\$ OR Tw pre-teen\$ OR Tw teen\$ OR Tw preadolescen\$ OR Tw pre-adolescenc\$ OR Tw adolescenc\$ OR Tw prepubert\$ OR Tw pre-pubert\$ OR Tw pubert\$ OR Tw niño\$ OR Tw niña\$ OR Tw bebé\$ OR Tw preescolar\$ OR Tw prescolar\$ OR Tw pre-escolar\$ OR Tw pre-scolar\$) [Words] and (MH Zinc OR MH Zinc Acetate OR MH Zinc Sulfate OR MH Zinc Compounds OR MH Zinc Oxide) OR Tw Zinc OR Tw Zn [Words]

27 WHO Library & Information Networks for Knowledge Database (WHOLIS)

28 zinc or Zn [All indexes] [All sources]

29 metaRegister of Controlled Trials

30 (Zinc or Zn) AND (infant or infants or baby or babies or toddler or toddlers or pre-school or preschool or pediatric or paediatric or child or children or girl or girls or boy or boys or pre-teen or pre-adolescent or adolescent or pre-pubertal)

31 WHO International Clinical Trials Registry Platform (ICTRP)

32 zinc or Zn [in the Intervention]

33 Conference Proceedings Citation Index (formerly known as ISI Proceedings)

34 TS=(zinc or Zn) AND TS=(newborn\* or neonat\* or neo-nat\* or (neo nat\*) or infan\* or baby or babies or toddler\* or preschool\* or pre-school\* or (pre school\*) or pediatric\* or paediatric\* or child\* or girl\* or boy\* or preteen\* or pre-teen\* or (pre teen\*) or teen\* or preadolescen\* or pre-adolescenc\* or (pre adolescenc\*) or adolescenc\* or prepubert\* or pre-pubert\* or (pre pubert\*) or pubert\*) AND TS=(random\* or control\* or clinic\* or trial\* or placebo\* or (drug therap\*) or group\* or crossover\* or cross-over\* or (cross over\*) or double\*-blind\* or (double\* blind\*) or single\*-blind\* or (single\* blind\*) or factorial\* or assign\* or allocat\* or volunteer\*)

1  
2  
3 ProQuest Dissertations & Theses Database  
4 (zinc or Zn) AND (newborn\* or neonat\* or neo-nat\* or infan\* or baby or babies or toddler\* or  
5 preschool\* or pre-school\* or pediatric\* or paediatric\* or child\* or girl\* or boy\* or preteen\* or pre-  
6 teen\* or teen\* or preadolescen\* or pre-adolescen\* or adolescen\* or prepubert\* or pre-pubert\* or  
7 pubert\*)  
8  
9  
10  
11  
12  
13  
14  
15  
16  
17  
18  
19  
20  
21  
22  
23  
24  
25  
26  
27  
28  
29  
30  
31  
32  
33  
34  
35  
36  
37  
38  
39  
40  
41  
42  
43  
44  
45  
46  
47  
48  
49  
50  
51  
52  
53  
54  
55  
56  
57  
58  
59  
60

For peer review only

**Appendix 2: Excluded studies**

| <b>Study</b>                      | <b>Reason for exclusion</b>                                |
|-----------------------------------|------------------------------------------------------------|
| Ahmed 2009 <sup>1</sup>           | Non-RCT                                                    |
| Bates 1993 <sup>2</sup>           | Non-RCT                                                    |
| Behrens 1990 <sup>3</sup>         | Therapeutic supplementation                                |
| Berger 2006 <sup>4-6</sup>        | Ineligible age                                             |
| Brooks 2005 <sup>7</sup>          | Ineligible age                                             |
| Campos 2004 <sup>8</sup>          | Non-RCT                                                    |
| Cuevas 2002 <sup>9</sup>          | No eligible comparison                                     |
| Duggan 2003 <sup>10</sup>         | Fortification                                              |
| Fahmida 2007 <sup>11</sup>        | Ineligible age                                             |
| Hashemipour 2009 <sup>12-14</sup> | Children were obese                                        |
| Heinig 2006 <sup>15,16</sup>      | Ineligible age                                             |
| Hess 2011 <sup>17</sup>           | Acceptability study randomizing order of administration    |
| Imamoglu 2005 <sup>18</sup>       | Non-RCT                                                    |
| Kordas 2005 <sup>19-21</sup>      | Therapeutic supplementation                                |
| NCT01472211 <sup>22</sup>         | Intervention not eligible (LifeStraw with or without zinc) |
| Osendarp 2002 <sup>23</sup>       | Ineligible age                                             |
| Payne-Robinson 1991 <sup>24</sup> | Severe protein-energy malnutrition                         |
| Perrone 1999 <sup>25</sup>        | No eligible comparison                                     |
| Ronaghy 1969 <sup>26</sup>        | Ineligible age                                             |
| Ronaghy 1974 <sup>27</sup>        | Ineligible age                                             |
| Roxas 1980 <sup>28</sup>          | Non-RCT                                                    |
| Shingwekar 1979 <sup>29</sup>     | Non-RCT                                                    |
| Shrivastava 1993 <sup>30</sup>    | Non-RCT                                                    |
| Walravens 1992 <sup>31</sup>      | Ineligible age                                             |
| Wasantwisut 2006 <sup>32</sup>    | Ineligible age                                             |
| Yanfeng 1997 <sup>33</sup>        | No eligible comparison                                     |
| Zeba 2008 <sup>34</sup>           | No eligible comparison                                     |

**Appendix 3: On-going studies**

| <b>Study</b>                       | <b>Reason for exclusion</b> |
|------------------------------------|-----------------------------|
| Arabaci 2010 <sup>35</sup>         | Awaiting classification     |
| Chicourel 2001 <sup>36</sup>       | Awaiting classification     |
| CTRI/2010/091/001417 <sup>37</sup> | On-going                    |
| Jimenez 2000 <sup>38</sup>         | Awaiting classification     |
| Mitter 2009 <sup>39</sup>          | Awaiting classification     |
| NCT00133406 <sup>40</sup>          | On-going                    |
| NCT00228254 <sup>41</sup>          | On-going                    |
| NCT00374023 <sup>42</sup>          | On-going                    |
| NCT00421668 <sup>43</sup>          | On-going                    |
| NCT00589264 <sup>44</sup>          | On-going                    |
| NCT00944359 <sup>45</sup>          | On-going                    |
| NCT00967551 <sup>46</sup>          | On-going                    |
| NCT00980421 <sup>47</sup>          | On-going                    |
| NCT01306097 <sup>48</sup>          | On-going                    |
| NCT01616693 <sup>49</sup>          | On-going                    |
| Smith 1985 <sup>50</sup>           | Awaiting classification     |



## Appendix 4: Included studies

| Study                              | Country | N      | Age        | Dose                                 | Duration | Form     | Height                             | Co-intervention     |
|------------------------------------|---------|--------|------------|--------------------------------------|----------|----------|------------------------------------|---------------------|
| Ahmed 2009 <sup>51</sup>           | BD      | 40     | 10 to 18   | 20mg daily                           | 1.5      | Solution | Not reported                       | Cholera vaccine     |
| Akramuzzaman 1994 <sup>52</sup>    | BD      | 256    | mean=35    | 20mg daily                           | 15       | Solution | Stunted and non-stunted            | Vitamins A, C, D    |
| Alarcon 2004 <sup>53</sup>         | PE      | 223    | 6 to 35    | 3mg/kg 6d/wk                         | 4.5      | Solution | HAZ=-1.04                          | Iron                |
| Albert 2003 <sup>54, 55</sup>      | BD      | 256    | 24 to 60   | 20mg daily                           | 1.5      | Solution | Not reported                       | Cholera vaccine     |
| Ba Lo 2011 <sup>56</sup>           | SN      | 97     | 9 to 17    | 6mg daily                            | 0.5      | Solution | Non-stunted only; HAZ=-0.44        | Micronutrients      |
| Baqui 2003 <sup>57-60</sup>        | BD      | 645    | 6 to 6     | 20mg weekly                          | 6        | Solution | Stunted and non-stunted; HAZ=-1.2  | Vitamin B           |
| Bhandari 2002 <sup>61-67</sup>     | IN      | 2482   | 6 to 30    | 10mg <1y; 20mg >1y daily             | 4        | Solution | Stunted and non-stunted; HAZ=-1.82 | Vitamin A           |
| Bhandari 2007 <sup>68, 69</sup>    | IN      | 72,438 | 6 to 23    | 10mg daily                           | 12       | Tablet   | Stunted and non-stunted; HAZ=-1.95 | Iron and folic acid |
| Brown 2007 <sup>70-73</sup>        | PE      | 200    | 6 to 8     | 3mg daily                            | 6        | Solution | Stunted and non-stunted; HAZ=-1.19 | Micronutrients      |
| Castillo-Duran 1994 <sup>74</sup>  | CL      | 114    | 72 to 168  | 10mg daily                           | 12       | Capsule  | Stunted only                       | None                |
| *Castillo-Duran 2002 <sup>75</sup> | CL      | 42     | 17 to 19   | 5mg daily                            | 12       | Solution | Non-stunted only                   | None                |
| Cavan 1993 <sup>76-78</sup>        | GT      | 162    | 68 to 96   | 10mg 5d/wk                           | 6.25     | Tablet   | Stunted and non-stunted; HAZ=-1.51 | Micronutrients      |
| Chang 2010 <sup>79</sup>           | BD      | 1000   | 6 to 18    | 5mg <1y; 10mg >1y alternate days     | 6        | Tablet   | Stunted and non-stunted; HAZ=-1.3  | None                |
| Chen 2012 <sup>80</sup>            | CN      | 361    | 36 to 72   | 10mg 5d/wk                           | 6        | Tablet   | HAZ=-0.264585635                   | Vitamin A           |
| Chhagan 2009 <sup>81-85</sup>      | ZA      | 227    | 6 to 6     | 10mg daily                           | 18       | Tablet   | Stunted and non-stunted; HAZ=-0.45 | Vitamin A           |
| Clark 1999 <sup>86</sup>           | UK      | 47     | mean=146   | 15mg daily                           | 1.5      | Unclear  | Non-stunted only                   | None                |
| Cole 2012 <sup>87</sup>            | BR      | 143    | 6 to 48    | 5mg daily                            | 3        | Powder   | Not reported                       | Micronutrients      |
| Dehbozorgi 2007 <sup>88</sup>      | IR      | 60     | 72 to 144  | 8mg daily                            | 6        | Solution | Not reported                       | None                |
| DiGirolamo 2010 <sup>89, 90</sup>  | GT      | 750    | 72 to 132  | 10mg 5d/wk                           | 5.8      | Tablet   | Stunted and non-stunted; HAZ=-1.2  | None                |
| Ebrahimi 2006 <sup>91</sup>        | IR      | 804    | 96 to 132  | 10mg 6d/wk                           | 7        | Solution | Not reported                       | None                |
| Fallahi 2007 <sup>92</sup>         | IR      | 53     | 132 to 143 | 20mg 6d/wk                           | 4        | Capsule  | Not reported                       | Iron                |
| Fonseca 2002 <sup>93</sup>         | BR      | 199    | 72 to 120  | 30mg weekly                          | 3        | Solution | Stunted and non-stunted            | None                |
| Friis 1997 <sup>94, 95</sup>       | ZW      | 313    | 132 to 204 | 30 mg <29.5 kg; 50 mg >29.5 kg 5d/wk | 12       | Tablet   | HAZ=-1.18                          | None                |

|                                             |    |       |             |                              |      |          |                                    |                       |
|---------------------------------------------|----|-------|-------------|------------------------------|------|----------|------------------------------------|-----------------------|
| Garcia 1998 <sup>96</sup>                   | CL | 33    | 66 to 159.6 | 20mg daily                   | 6    | Unclear  | Stunted and non-stunted; HAZ=-2.6  | None                  |
| Gibson 1989 <sup>97</sup>                   | CA | 60    | 59 to 95    | 10mg daily                   | 12   | Solution | Stunted and non-stunted; HAZ=-1.39 | None                  |
| Gracia 2005 <sup>98</sup>                   | CO | 350   | 24 to 59    | 12mg daily                   | 8    | Unclear  | Stunted and non-stunted; HAZ=0     | Micronutrients        |
| Gupta 2003 <sup>99</sup>                    | IN | 280   | 6 to 41     | 10mg or 50mg 5d/wk or weekly | 4    | Solution | Not reported                       | None                  |
| Gupta 2007 <sup>100</sup>                   | IN | 1,878 | 6 to 48     | 50mg weekly                  | 6    | Solution | Not reported                       | Vitamin B             |
| Hambidge 1978 <sup>101, 102</sup>           | US | 75    | 38 to 61    | 14mg 5d/wk                   | 6    | Solution | Not reported                       | None                  |
| Han 2002 <sup>103, 104</sup>                | CN | 119   | 36 to 60    | 3.5mg 5d/wk                  | 12   | Tablet   | Not reported                       | Vitamin A and Calcium |
| Hettiarachchi 2008 <sup>105</sup>           | LK | 341   | 144 to 155  | 14mg 5d/wk                   | 6    | Capsule  | Stunted and non-stunted; HAZ=-1.16 | None                  |
| Hong 1982 <sup>106</sup>                    | CN | 158   | 4 to 72     | Daily                        | 2.4  | Solution | Stunted and non-stunted            | Vitamin B             |
| Ince 1995 <sup>107</sup>                    | TR | 25    | 25 to 76    | 10mg daily                   | 12   | Solution | Non-stunted only; HAZ=-1.55        | None                  |
| Kartasurya 2012 <sup>108</sup>              | ID | 826   | 24 to 60    | 10mg daily                   | 4    | Solution | Non-stunted only; HAZ=-1.730145278 | Vitamin A             |
| Kikafunda 1998 <sup>109-111</sup>           | UG | 155   | 33 to 89    | 10mg 5d/wk                   | 6    | Tablet   | HAZ=-0.7                           | None                  |
| Kurugöl 2006 <sup>112</sup>                 | TR | 200   | 24 to 120   | 15mg daily                   | 7    | Solution | Not reported                       | None                  |
| Larson 2010 <sup>113, 114</sup>             | BD | 353   | 6 to 24     | 10mg daily                   | 3    | Solution | HAZ=-1.72                          | None                  |
| Lind 2003 <sup>115-118</sup>                | ID | 680   | 6 to 6      | 10mg daily                   | 6    | Solution | Stunted and non-stunted; HAZ=-0.34 | Vitamin C             |
| Long 2006 <sup>119-122</sup>                | MX | 786   | 6 to 15     | 20mg daily                   | 12   | Solution | Stunted and non-stunted; HAZ=0.1   | None                  |
| Mahloudji 1975 <sup>123</sup>               | IR | 50    | 72 to 144   | 20mg 6d/wk                   | 16   | Capsule  | Not reported                       | Micronutrients        |
| Malik 2013 <sup>124</sup>                   | IN | 158   | 6 to 11     | 20mg daily                   | 0.46 | Solution | Not reported                       | None                  |
| *Marinho 1991 <sup>125</sup>                | BR | 240   | 36 to 84    | 5mg daily                    | 1    | Unclear  | Stunted and non-stunted            | None                  |
| Mazariegos 2010 <sup>126</sup>              | GT | 412   | 6 to 6      | 5mg daily                    | 6    | Tablet   | Stunted and non-stunted; HAZ=-2.09 | Low-phytate maize     |
| Meeks Gardner 1998 <sup>127, 128</sup>      | JM | 61    | 6 to 24     | 5mg daily                    | 3    | Solution | Stunted only; HAZ=-2.9             | Micronutrients        |
| Meeks Gardner 2005 <sup>129</sup>           | JM | 126   | 9 to 30     | 10mg daily                   | 6    | Solution | HAZ=-1.42                          | Micronutrients        |
| Mozaffari-Khosravi 2009 <sup>130, 131</sup> | IR | 90    | 25 to 69    | 5mg daily                    | 6    | Solution | Stunted and non-stunted; HAZ=-1.59 | None                  |
| Muller 2001 <sup>132-134</sup>              | BF | 709   | 6 to 30     | 12.5mg 6d/wk                 | 6    | Tablet   | Stunted and non-stunted; HAZ=-1.6  | None                  |
| Nakamura 1993 <sup>135</sup>                | JP | 21    | mean=70     | 5mg/kg daily                 | 6    | Unclear  | Stunted only; HAZ=-2.44            | None                  |
| Ninh 1996 <sup>136</sup>                    | VN | 210   | 4 to 36     | 10mg daily                   | 5    | Solution | Stunted only; HAZ=-2.61            | None                  |

|                                       |    |        |            |                          |        |          |                                    |                     |
|---------------------------------------|----|--------|------------|--------------------------|--------|----------|------------------------------------|---------------------|
| Penny 2004 <sup>137, 138</sup>        | PE | 164    | 6 to 35    | 10mg daily               | 6      | Solution | Stunted and non-stunted; HAZ=-1.56 | None                |
| Rahman 2001 <sup>139-142</sup>        | BD | 800    | 12 to 35   | 20mg daily               | 0.5    | Solution | Stunted and non-stunted; HAZ=-2.41 | None                |
| Richard 2006 <sup>143</sup>           | PE | 855    | 6 to 180   | 20mg daily               | 7      | Solution | Stunted and non-stunted; HAZ=-2.08 | None                |
| Rosado 1997 <sup>144-146</sup>        | MX | 219    | 18 to 36   | 20mg 6d/wk               | 12     | Solution | Stunted and non-stunted; HAZ=-1.6  | None                |
| Rosales 2004 <sup>147</sup>           | GT | 76     | 96 to 132  | 42.5mg 5d/wk             | 2      | Solution | Not reported                       | None                |
| Ruel 1997 <sup>148-150</sup>          | GT | 108    | 6 to 9     | 10mg daily               | 7      | Solution | Stunted and non-stunted; HAZ=-2.16 | None                |
| Ruz 1997 <sup>151</sup>               | CL | 98     | 27 to 50   | 10mg daily               | 14     | Solution | Stunted and non-stunted; HAZ=-0.52 | None                |
| *Sandstead 1998 <sup>152, 153</sup>   | CN | NR     | 72 to 108  | 20mg 6d/wk               | 2.5    | Tablet   | Not reported                       | Micronutrients      |
| Sandstead 2008 <sup>154</sup>         | US | 54     | 72 to 84   | 20mg 5d/wk               | 2.5    | Unclear  | Not reported                       | Micronutrients      |
| *Sanjur 1990 <sup>155</sup>           | US | NR     | 12 to 24   | Daily                    | 6      | Tablet   | Not reported                       | Micronutrients      |
| Sayeg Porto 2000 <sup>156</sup>       | BR | 21     | 84 to 120  | 5mg/kg daily             | 6      | Solution | Stunted only; HAZ=-2.67            | None                |
| Sazawal 1996 <sup>157-166</sup>       | IN | 609    | 6 to 35    | 10mg daily               | 6      | Solution | Stunted and non-stunted            | Micronutrients      |
| Sazawal 2006 <sup>167-176</sup>       | TZ | 60,225 | 1 to 35    | 5mg <1y; 10mg >1y daily  | 16     | Tablet   | Stunted and non-stunted; HAZ=-1.5  | Micronutrients      |
| Schultink 1997 <sup>177</sup>         | ID | 85     | 24 to 60   | 15mg daily               | 2      | Solution | Stunted and non-stunted; HAZ=-2.5  | Iron                |
| Sempertegui 1996 <sup>178, 179</sup>  | EC | 50     | 12 to 59   | 10mg daily               | 2      | Solution | Stunted and non-stunted; HAZ=-2    | None                |
| *Shah 2011 <sup>180</sup>             | IN | NR     | 6 to 59    | 10mg daily               | 2      | Unclear  | Not reported                       | None                |
| Shankar 2000 <sup>181, 182</sup>      | PG | 274    | 6 to 60    | 10mg 6d/wk               | 11.5   | Tablet   | Stunted and non-stunted; HAZ=-1.9  | None                |
| Silva 2006 <sup>183</sup>             | BR | 60     | 12 to 59   | 10mg daily               | 4      | Solution | Stunted and non-stunted; HAZ=-1.9  | Iron-fortified milk |
| Smith 1999 <sup>184</sup>             | BZ | 51     | Preschool  | 70mg weekly              | 6      | Solution | Stunted and non-stunted            | None                |
| Soofi 2013 <sup>185</sup>             | PK | 1305   | 6 to 6     | 10mg daily               | 12     | Powder   | Stunted and non-stunted            | Micronutrients      |
| Tielsch 2006 <sup>186-193</sup>       | NP | 49,205 | 1 to 35    | 5mg < 1y; 10mg >1y daily | to 36m | Tablet   | Stunted and non-stunted            | Iron and folic acid |
| Tupe 2009 <sup>194, 195</sup>         | IN | 88     | 120 to 155 | 16.6mg 6d/wk             | 2.5    | Tablet   | Stunted and non-stunted; HAZ=-1.3  | None                |
| Uckardes 2009 <sup>196-198</sup>      | TR | 226    | 89 to 140  | 15mg 5d/wk               | 2.5    | Solution | Not reported                       | None                |
| Udomkesmalee 1992 <sup>199, 200</sup> | TH | 133    | 72 to 156  | 25mg 5d/wk               | 6      | Capsule  | Stunted and non-stunted            | Vitamin A           |
| Umeta 2000 <sup>201-203</sup>         | ET | 200    | 6 to 12    | 10mg 6d/wk               | 6      | Solution | Stunted and non-stunted; HAZ=-1.7  | None                |
| *Vakili 2009 <sup>204</sup>           | IR | 200    | 78 to 120  | 10mg 6d/wk               | 5      | Tablet   | Not reported                       | None                |

1  
2  
3  
4  
5  
6  
7  
8  
9  
10  
11  
12  
13  
14  
15  
16  
17  
18  
19  
20  
21  
22  
23  
24  
25  
26  
27  
28  
29  
30  
31  
32  
33  
34  
35  
36  
37  
38  
39  
40  
41  
42  
43  
44  
45  
46  
47

|                                    |    |     |          |                          |      |          |                                    |                |
|------------------------------------|----|-----|----------|--------------------------|------|----------|------------------------------------|----------------|
| Veenemans 2011 <sup>205-208</sup>  | TZ | 612 | 6 to 60  | 10mg daily               | 11   | Capsule  | Stunted and non-stunted; HAZ=-2.43 | Micronutrients |
| Walravens 1983 <sup>209, 210</sup> | US | 57  | 24 to 72 | 5mg 2x daily             | 12   | Solution | Stunted and non-stunted; HAZ=-2.07 | None           |
| Walravens 1989 <sup>211</sup>      | US | NR  | 8 to 27  | 25mg (frequency unclear) | 6    | Solution | HAZ=-1.35                          | None           |
| Wessells 2012 <sup>212, 213</sup>  | BF | 451 | 6 to 23  | 5mg daily                | 0.75 | Solution | HAZ=-1.5                           | None           |
| Wuehler 2008 <sup>214, 215</sup>   | EC | 503 | 12 to 30 | 3, 7, or 10mg daily      | 6    | Solution | Stunted and non-stunted; HAZ=-2.3  | None           |

\*Not included in meta-analysis; Age and duration reported in months

For peer review only

Appendix 5: Risk of bias

|                     | Random sequence generation (selection bias) | Allocation concealment (selection bias) | Blinding of participants (performance bias) | Blinding of personnel (performance bias) | Blinding of outcome assessment (detection bias) | Incomplete outcome data (attrition bias) | Selective reporting (reporting bias) | Other bias |
|---------------------|---------------------------------------------|-----------------------------------------|---------------------------------------------|------------------------------------------|-------------------------------------------------|------------------------------------------|--------------------------------------|------------|
| Ahmed 2009          | ?                                           | ?                                       | ?                                           | ?                                        | ?                                               | +                                        | ?                                    | +          |
| Akramuzzaman 1994   | ?                                           | ?                                       | ?                                           | ?                                        | ?                                               | ?                                        | ?                                    | +          |
| Alarcon 2004        | ?                                           | ?                                       | +                                           | +                                        | +                                               | +                                        | ?                                    | +          |
| Albert 2003         | ?                                           | +                                       | +                                           | +                                        | +                                               | +                                        | +                                    | +          |
| Ba Lo 2011          | +                                           | ?                                       | +                                           | +                                        | +                                               | +                                        | +                                    | +          |
| Baqui 2003          | ?                                           | ?                                       | +                                           | +                                        | +                                               | +                                        | +                                    | +          |
| Bhandari 2002       | +                                           | +                                       | +                                           | +                                        | +                                               | +                                        | +                                    | +          |
| Bhandari 2007       | +                                           | +                                       | +                                           | +                                        | +                                               | +                                        | +                                    | +          |
| Brown 2007          | +                                           | +                                       | +                                           | +                                        | +                                               | ?                                        | +                                    | +          |
| Castillo-Duran 1994 | ?                                           | ?                                       | +                                           | +                                        | +                                               | ?                                        | +                                    | +          |
| Castillo-Duran 2002 | ?                                           | ?                                       | ?                                           | ?                                        | ?                                               | ?                                        | +                                    | +          |
| Cavan 1993          | +                                           | +                                       | +                                           | +                                        | +                                               | +                                        | +                                    | +          |
| Chang 2010          | +                                           | +                                       | +                                           | +                                        | +                                               | +                                        | ?                                    | +          |
| Chen 2012           | ?                                           | ?                                       | +                                           | +                                        | ?                                               | ?                                        | ?                                    | +          |
| Chhagan 2009        | +                                           | +                                       | +                                           | +                                        | +                                               | ?                                        | +                                    | ?          |
| Clark 1999          | ?                                           | ?                                       | +                                           | +                                        | +                                               | +                                        | ?                                    | +          |
| Cole 2012           | +                                           | ?                                       | +                                           | +                                        | +                                               | +                                        | ?                                    | +          |
| Dehbozorgi 2007     | ?                                           | ?                                       | +                                           | +                                        | +                                               | ?                                        | +                                    | +          |
| DiGirolamo 2010     | +                                           | +                                       | +                                           | +                                        | +                                               | +                                        | ?                                    | +          |
| Ebrahimi 2006       | ?                                           | ?                                       | +                                           | +                                        | +                                               | ?                                        | ?                                    | +          |
| Fallahi 2007        | ?                                           | ?                                       | ?                                           | ?                                        | ?                                               | +                                        | ?                                    | +          |
| Fonseca 2002        | +                                           | ?                                       | +                                           | +                                        | +                                               | ?                                        | +                                    | +          |
| Friis 1997          | ?                                           | ?                                       | +                                           | +                                        | +                                               | ?                                        | +                                    | +          |
| Garcia 1998         | ?                                           | ?                                       | +                                           | +                                        | +                                               | +                                        | ?                                    | +          |
| Gibson 1989         | ?                                           | +                                       | +                                           | +                                        | +                                               | +                                        | ?                                    | +          |
| Gracia 2005         | ?                                           | ?                                       | +                                           | +                                        | +                                               | ?                                        | +                                    | +          |
| Gupta 2003          | +                                           | +                                       | +                                           | +                                        | +                                               | +                                        | +                                    | +          |
| Gupta 2007          | ?                                           | ?                                       | +                                           | +                                        | +                                               | +                                        | +                                    | +          |
| Hambidge 1978       | ?                                           | ?                                       | ?                                           | ?                                        | ?                                               | ?                                        | ?                                    | +          |
| Han 2002            | ?                                           | ?                                       | +                                           | +                                        | +                                               | ?                                        | ?                                    | +          |
| Hettiarachchi 2008  | ?                                           | ?                                       | +                                           | +                                        | +                                               | ?                                        | ?                                    | +          |
| Hong 1982           | ?                                           | ?                                       | ?                                           | ?                                        | ?                                               | ?                                        | ?                                    | +          |
| Ince 1995           | +                                           | ?                                       | +                                           | +                                        | +                                               | +                                        | ?                                    | +          |
| Kartasurya 2012     | +                                           | +                                       | +                                           | +                                        | +                                               | +                                        | +                                    | +          |
| Kikafunda 1998      | ?                                           | ?                                       | +                                           | +                                        | +                                               | ?                                        | +                                    | +          |
| Kurugöl 2006        | +                                           | +                                       | +                                           | +                                        | +                                               | +                                        | ?                                    | +          |
| Larson 2010         | +                                           | +                                       | +                                           | +                                        | +                                               | +                                        | +                                    | +          |

Review only

|                         | Random sequence generation (selection bias) | Allocation concealment (selection bias) | Blinding of participants (performance bias) | Blinding of personnel (performance bias) | Blinding of outcome assessment (detection bias) | Incomplete outcome data (attrition bias) | Selective reporting (reporting bias) | Other bias |
|-------------------------|---------------------------------------------|-----------------------------------------|---------------------------------------------|------------------------------------------|-------------------------------------------------|------------------------------------------|--------------------------------------|------------|
| Lind 2003               | ?                                           | +                                       | +                                           | +                                        | +                                               | +                                        | +                                    | +          |
| Long 2006               | +                                           | +                                       | +                                           | +                                        | +                                               | +                                        | ?                                    | +          |
| Mahloudji 1975          | ?                                           | ?                                       | +                                           | +                                        | +                                               | ?                                        | +                                    | +          |
| Malik 2013              | +                                           | +                                       | +                                           | +                                        | +                                               | +                                        | +                                    | +          |
| Marinho 1991            | ?                                           | ?                                       | ?                                           | ?                                        | ?                                               | ?                                        | ?                                    | +          |
| Mazariegos 2010         | +                                           | +                                       | +                                           | +                                        | +                                               | +                                        | +                                    | +          |
| Meeks Gardner 1998      | ?                                           | ?                                       | +                                           | +                                        | +                                               | ?                                        | ?                                    | +          |
| Meeks Gardner 2005      | ?                                           | ?                                       | +                                           | +                                        | +                                               | +                                        | ?                                    | ?          |
| Mozaffari-Khosravi 2009 | +                                           | +                                       | +                                           | +                                        | +                                               | ?                                        | ?                                    | +          |
| Muller 2001             | +                                           | +                                       | +                                           | +                                        | +                                               | +                                        | ?                                    | +          |
| Nakamura 1993           | ?                                           | ?                                       | ?                                           | ?                                        | ?                                               | ?                                        | ?                                    | +          |
| Ninh 1996               | ?                                           | ?                                       | +                                           | +                                        | +                                               | ?                                        | +                                    | +          |
| Penny 2004              | +                                           | ?                                       | +                                           | +                                        | +                                               | +                                        | ?                                    | +          |
| Rahman 2001             | +                                           | +                                       | +                                           | +                                        | +                                               | +                                        | +                                    | +          |
| Richard 2006            | +                                           | ?                                       | +                                           | +                                        | +                                               | +                                        | ?                                    | +          |
| Rosado 1997             | ?                                           | ?                                       | +                                           | +                                        | +                                               | +                                        | ?                                    | +          |
| Rosales 2004            | +                                           | ?                                       | +                                           | +                                        | +                                               | +                                        | ?                                    | +          |
| Ruel 1997               | ?                                           | ?                                       | +                                           | +                                        | +                                               | +                                        | ?                                    | +          |
| Ruz 1997                | ?                                           | +                                       | +                                           | +                                        | +                                               | ?                                        | +                                    | +          |
| Sandstead 1998          | ?                                           | ?                                       | +                                           | +                                        | +                                               | ?                                        | +                                    | +          |
| Sandstead 2008          | ?                                           | +                                       | +                                           | +                                        | +                                               | ?                                        | ?                                    | +          |
| Sanjur 1990             | ?                                           | ?                                       | +                                           | +                                        | +                                               | ?                                        | ?                                    | +          |
| Sayeg Porto 2000        | ?                                           | +                                       | +                                           | +                                        | +                                               | ?                                        | +                                    | +          |
| Sazawal 1996            | +                                           | +                                       | +                                           | +                                        | +                                               | +                                        | +                                    | +          |
| Sazawal 2006            | +                                           | +                                       | +                                           | +                                        | +                                               | +                                        | +                                    | +          |
| Schultink 1997          | ?                                           | ?                                       | +                                           | +                                        | +                                               | ?                                        | ?                                    | +          |
| Sempertegui 1996        | +                                           | ?                                       | +                                           | +                                        | +                                               | +                                        | ?                                    | +          |
| Shah 2011               | ?                                           | ?                                       | ?                                           | ?                                        | ?                                               | ?                                        | +                                    | +          |
| Shankar 2000            | +                                           | +                                       | +                                           | +                                        | +                                               | +                                        | +                                    | +          |
| Silva 2006              | ?                                           | ?                                       | ?                                           | ?                                        | ?                                               | +                                        | +                                    | +          |
| Smith 1999              | ?                                           | ?                                       | ?                                           | ?                                        | ?                                               | +                                        | ?                                    | ?          |
| Soofi 2013              | +                                           | +                                       | +                                           | +                                        | +                                               | +                                        | +                                    | +          |
| Tielsch 2006            | +                                           | +                                       | +                                           | +                                        | +                                               | +                                        | ?                                    | +          |
| Tupe 2009               | +                                           | ?                                       | ?                                           | ?                                        | +                                               | +                                        | ?                                    | +          |

review only

|                   | Random sequence generation (selection bias) | Allocation concealment (selection bias) | Blinding of participants (performance bias) | Blinding of personnel (performance bias) | Blinding of outcome assessment (detection bias) | Incomplete outcome data (attrition bias) | Selective reporting (reporting bias) | Other bias |
|-------------------|---------------------------------------------|-----------------------------------------|---------------------------------------------|------------------------------------------|-------------------------------------------------|------------------------------------------|--------------------------------------|------------|
| Uckardes 2009     | ?                                           | ?                                       | +                                           | +                                        | +                                               | +                                        | ?                                    | ?          |
| Udomkesmalee 1992 | ?                                           | ?                                       | +                                           | +                                        | +                                               | +                                        | +                                    | +          |
| Umeta 2000        | ?                                           | ?                                       | +                                           | +                                        | +                                               | +                                        | ?                                    | +          |
| Vakili 2009       | ?                                           | ?                                       | ?                                           | ?                                        | ?                                               | +                                        | ?                                    | +          |
| Veenemans 2011    | +                                           | +                                       | +                                           | +                                        | +                                               | +                                        | +                                    | +          |
| Walravens 1983    | ?                                           | +                                       | +                                           | +                                        | +                                               | ?                                        | ?                                    | +          |
| Walravens 1989    | ?                                           | ?                                       | +                                           | +                                        | +                                               | ?                                        | ?                                    | +          |
| Wessells 2012     | +                                           | +                                       | ?                                           | ?                                        | ?                                               | +                                        | ?                                    | +          |
| Wuehler 2008      | +                                           | +                                       | +                                           | +                                        | +                                               | +                                        | +                                    | +          |

## Appendix 6: Subgroup analyses

| Subgroup                                                                         | Trials    | People       | Effect size (95% CI), fixed | I <sup>2</sup> ; Chi <sup>2</sup> (p value) |
|----------------------------------------------------------------------------------|-----------|--------------|-----------------------------|---------------------------------------------|
| <b>Prevalence of diarrhoea (RR)</b>                                              | <b>13</b> | <b>8519</b>  | <b>0.88 (0.86 to 0.90)</b>  | <b>88%; 118.88 (p&lt;0.00001)</b>           |
| <i>Iron co-supplementation (I<sup>2</sup>=75%; Chi<sup>2</sup>=3.97, p=0.05)</i> |           |              |                             |                                             |
| with iron                                                                        | 3         | 1024         | 0.96 (0.88 to 1.05)         | 96%; 46.97 (p<0.00001)                      |
| without iron                                                                     | 11        | 7495         | 0.88 (0.86 to 0.90)         | 84%; 67.94 (p<0.00001)                      |
| <i>Age (I<sup>2</sup>=97%; Chi<sup>2</sup>=30.52, p&lt;0.00001)</i>              |           |              |                             |                                             |
| 6m to 1y                                                                         | 7         | 3714         | 0.96 (0.93 to 1.00)         | 94%; 112.81 (p<0.00001)                     |
| 1y to 5y                                                                         | 7         | 4805         | 0.85 (0.83 to 0.87)         | 37%; 11.03 (p=0.14)                         |
| <i>Dose (I<sup>2</sup>=94%; Chi<sup>2</sup>=61.69, p&lt;0.00001)</i>             |           |              |                             |                                             |
| 0mg to 5mg                                                                       | 2         | 1200         | 1.00 (0.92 to 1.08)         | 94%; 33.41 (p<0.00001)                      |
| 5mg to 10mg                                                                      | 1         | 274          | 1.17 (0.60 to 2.28)         | Not applicable                              |
| 10mg to 15mg                                                                     | 6         | 3434         | 0.93 (0.90 to 0.96)         | 66%; 14.53 (p=0.01)                         |
| 15mg to 20mg                                                                     | 1         | 258          | 0.61 (0.54 to 0.69)         | Not applicable                              |
| 20mg or more                                                                     | 3         | 3353         | 0.85 (0.82 to 0.87)         | 68%; 9.24 (p=0.03)                          |
| <i>Duration (I<sup>2</sup>=86%; Chi<sup>2</sup>=13.98, p=0.0009)</i>             |           |              |                             |                                             |
| 0m to 6m                                                                         | 3         | 3353         | 0.85 (0.82 to 0.87)         | 68%; 9.24 (p=0.03)                          |
| 6m to 12m                                                                        | 9         | 4957         | 0.92 (0.89 to 0.95)         | 91%; 95.66 (p<0.00001)                      |
| 12m or more                                                                      | 1         | 209          | 0.88 (0.74 to 1.03)         | Not applicable                              |
| <i>Formulation (I<sup>2</sup>=86%; Chi<sup>2</sup>=13.99, p=0.0009)</i>          |           |              |                             |                                             |
| Solution                                                                         | 8         | 4657         | 0.88 (0.85 to 0.90)         | 92%; 97.84 (p<0.00001)                      |
| Pill/ tablet                                                                     | 4         | 2144         | 0.86 (0.81 to 0.92)         | 43%; 7.05 (p=0.13)                          |
| Capsule                                                                          | 1         | 1718         | 1.03 (0.95 to 1.12)         | Not applicable                              |
| <b>Incidence of LRTI (RR)</b>                                                    | <b>12</b> | <b>9610</b>  | <b>1.00 (0.94 to 1.07)</b>  | <b>1%; 17.16 (p=0.44)</b>                   |
| <i>Iron co-supplementation (I<sup>2</sup>=0%; Chi<sup>2</sup>=0.06, p=0.80)</i>  |           |              |                             |                                             |
| with iron                                                                        | 5         | 2896         | 0.99 (0.87 to 1.12)         | 0%; 2.92 (p=0.71)                           |
| without iron                                                                     | 10        | 6714         | 1.01 (0.93 to 1.08)         | 22%; 14.17 (p=0.22)                         |
| <i>Age (I<sup>2</sup>=0%; Chi<sup>2</sup>=1.50, p=0.47)</i>                      |           |              |                             |                                             |
| 6m to 1y                                                                         | 5         | 3566         | 0.97 (0.88 to 1.07)         | 0%; 2.12 (p=0.95)                           |
| 1y to 5y                                                                         | 5         | 4605         | 1.05 (0.96 to 1.16)         | 25%; 8.01 (p=0.24)                          |
| 5y to 13y                                                                        | 1         | 836          | 1.00 (0.72 to 1.40)         | Not applicable                              |
| <i>Dose (I<sup>2</sup>=0%; Chi<sup>2</sup>=0.60, p=0.74)</i>                     |           |              |                             |                                             |
| 0mg to 5mg                                                                       | 3         | 845          | 0.94 (0.78 to 1.13)         | 0%; 0.93 (p=0.63)                           |
| 10mg to 15mg                                                                     | 8         | 4045         | 1.00 (0.91 to 1.10)         | 25%; 9.32 (p=0.23)                          |
| 20mg or more                                                                     | 7         | 4720         | 1.02 (0.92 to 1.13)         | 5%; 6.31 (p=0.39)                           |
| <i>Duration (I<sup>2</sup>=0%; Chi<sup>2</sup>=0.79, p=0.67)</i>                 |           |              |                             |                                             |
| 0m to 6m                                                                         | 2         | 3148         | 1.03 (0.92 to 1.14)         | 67%; 6.05 (p=0.05)                          |
| 6m to 12m                                                                        | 8         | 5114         | 0.98 (0.90 to 1.06)         | 0%; 9.69 (p=0.47)                           |
| 12m or more                                                                      | 2         | 1348         | 1.08 (0.83 to 1.42)         | 0%; 0.64 (p=0.89)                           |
| <i>Formulation (I<sup>2</sup>=20%; Chi<sup>2</sup>=3.73, p=0.29)</i>             |           |              |                             |                                             |
| Solution                                                                         | 9         | 7007         | 0.98 (0.91 to 1.05)         | 2%; 13.25 (p=0.43)                          |
| Pill/ tablet                                                                     | 1         | 686          | 1.19 (0.93 to 1.51)         | Not applicable                              |
| Capsule                                                                          | 1         | 612          | 1.12 (0.84 to 1.51)         | Not applicable                              |
| Powder                                                                           | 1         | 1305         | 1.25 (0.75 to 2.09)         | Not applicable                              |
| <b>Height (SMD)</b>                                                              | <b>51</b> | <b>13669</b> | <b>0.09 (0.06 to 0.13)</b>  | <b>86%; 407.92 (p&lt;0.00001)</b>           |
| <i>Iron co-supplementation (I<sup>2</sup>=85%; Chi<sup>2</sup>=6.60, p=0.01)</i> |           |              |                             |                                             |
| with iron                                                                        | 12        | 2929         | 0.01 (-0.07 to 0.08)        | 29%; 15.48 (p=0.16)                         |
| without iron                                                                     | 44        | 10510        | 0.12 (0.08 to 0.16)         | 88%; 385.12 (p<0.00001)                     |
| <i>Age (I<sup>2</sup>=98%; Chi<sup>2</sup>=117.89, p&lt;0.00001)</i>             |           |              |                             |                                             |
| 6m to 1y                                                                         | 9         | 3730         | -0.26 (-0.33 to 0.19)       | 94%; 204.70 (p<0.00001)                     |
| 1y to 5y                                                                         | 24        | 6155         | 0.09 (0.04 to 0.14)         | 42%; 44.94 (p=0.01)                         |
| 5y to 13y                                                                        | 16        | 3449         | 0.25 (0.18 to 0.32)         | 94%; 277.24 (p<0.00001)                     |
| <i>Dose (I<sup>2</sup>=91%; Chi<sup>2</sup>=43.60, p&lt;0.00001)</i>             |           |              |                             |                                             |
| 0mg to 5mg                                                                       | 5         | 1170         | 0.02 (0.10 to 0.13)         | 58%; 14.30 (p=0.03)                         |
| 5mg to 10mg                                                                      | 8         | 2978         | 0.29 (0.22 to 0.37)         | 96%; 271.49 (p<0.00001)                     |
| 10mg to 15mg                                                                     | 22        | 4344         | 0.06 (0.00 to 0.12)         | 29%; 33.90 (p=0.09)                         |
| 15mg to 20mg                                                                     | 2         | 240          | -0.01 (-0.26 to 0.24)       | 39%; 3.26 (p=0.20)                          |
| 20mg or more                                                                     | 3         | 4675         | -0.01 (0.07 to 0.05)        | 11%; 11.22 (p=0.34)                         |
| <i>Duration (I<sup>2</sup>=91%; Chi<sup>2</sup>=21.62, p&lt;0.00001)</i>         |           |              |                             |                                             |
| 0m to 6m                                                                         | 12        | 4475         | -0.01 (-0.07 to 0.04)       | 76%; 50.43 (p<0.00001)                      |
| 6m to 12m                                                                        | 26        | 6479         | 0.17 (0.12 to 0.22)         | 91%; 313.67 (p<0.00001)                     |
| 12m or more                                                                      | 12        | 2715         | 0.10 (0.02 to 0.17)         | 32%; 22.21 (p=0.10)                         |
| <i>Iron co-supplementation (I<sup>2</sup>=85%; Chi<sup>2</sup>=6.60, p=0.01)</i> |           |              |                             |                                             |
| with iron                                                                        | 12        | 2929         | 0.01 (-0.07 to 0.08)        | 29%; 15.48 (p=0.16)                         |
| without iron                                                                     | 44        | 10510        | 0.12 (0.08 to 0.16)         | 88%; 385.12 (p<0.00001)                     |
| <i>Formulation (I<sup>2</sup>=75%; Chi<sup>2</sup>=8.03, p=0.02)</i>             |           |              |                             |                                             |
| Solution                                                                         | 32        | 9030         | 0.12 (0.07 to 0.16)         | 90%; 367.20 (p<0.00001)                     |
| Pill/ tablet                                                                     | 11        | 3868         | 0.02 (-0.04 to 0.09)        | 9%; 12.11 (p=0.36)                          |
| Capsule                                                                          | 2         | 322          | 0.31 (0.03 to 0.59)         | 0%; 0.90 (p=0.64)                           |
| <b>Weight (SMD)</b>                                                              | <b>44</b> | <b>12305</b> | <b>0.10 (0.07 to 0.14)</b>  | <b>76%; 216.64 (p&lt;0.00001)</b>           |
| <i>Iron co-supplementation (I<sup>2</sup>=34%; Chi<sup>2</sup>=1.50, p=0.22)</i> |           |              |                             |                                             |
| with iron                                                                        | 10        | 2494         | 0.06 (-0.02 to 0.14)        | 5%; 9.50 (p=0.39)                           |
| without iron                                                                     | 39        | 9811         | 0.12 (0.08 to 0.16)         | 80%; 205.63 (p<0.00001)                     |



|                                                                                                   |    |      |                        |                             |
|---------------------------------------------------------------------------------------------------|----|------|------------------------|-----------------------------|
| <b>Age</b> ( $I^2=99\%$ ; $Chi^2=136.86$ , $p<0.00001$ )                                          |    |      |                        |                             |
| 6m to 1y                                                                                          | 9  | 3730 | -0.31 (-0.38 to -0.25) | 97%; 387.48 ( $p<0.00001$ ) |
| 1y to 5y                                                                                          | 20 | 5565 | 0.06 (0.01 to 0.11)    | 43%; 38.72 ( $p=0.02$ )     |
| 5y to 13y                                                                                         | 13 | 2654 | 0.28 (0.20 to 0.36)    | 89%; 117.28 ( $p<0.00001$ ) |
| <b>Dose</b> ( $I^2=89\%$ ; $Chi^2=35.38$ , $p<0.00001$ )                                          |    |      |                        |                             |
| 0mg to 5mg                                                                                        | 5  | 1170 | 0.00 (-0.11 to 0.12)   | 0%; 2.79 ( $p=0.83$ )       |
| 5mg to 10mg                                                                                       | 10 | 2766 | 0.27 (0.20 to 0.35)    | 92%; 108.31 ( $p<0.00001$ ) |
| 10mg to 15mg                                                                                      | 19 | 3969 | 0.11 (0.04 to 0.17)    | 34%; 31.75 ( $p=0.06$ )     |
| 15mg to 20mg                                                                                      | 2  | 240  | -0.20 (-0.45 to 0.06)  | 13%; 2.30 ( $p=0.32$ )      |
| 20mg or more                                                                                      | 7  | 3919 | 0.01 (-0.05 to 0.08)   | 36%; 12.43 ( $p=0.13$ )     |
| <b>Duration</b> ( $I^2=92\%$ ; $Chi^2=23.59$ , $p<0.00001$ )                                      |    |      |                        |                             |
| 0m to 6m                                                                                          | 11 | 4417 | 0.05 (0.00 to 0.11)    | 76%; 44.95 ( $p<0.00001$ )  |
| 6m to 12m                                                                                         | 22 | 5289 | 0.20 (0.15 to 0.26)    | 82%; 131.52 ( $p<0.00001$ ) |
| 12m or more                                                                                       | 11 | 2599 | -0.01 (-0.07 to 0.09)  | 16%; 16.58 ( $p=0.28$ )     |
| <b>Formulation</b> ( $I^2=87\%$ ; $Chi^2=15.43$ , $p=0.0004$ )                                    |    |      |                        |                             |
| Solution                                                                                          | 29 | 8147 | 0.14 (0.10 to 0.19)    | 82%; 182.72 ( $p<0.00001$ ) |
| Pill/ tablet                                                                                      | 10 | 3656 | 0.01 (-0.06 to 0.08)   | 13%; 11.51 ( $p=0.32$ )     |
| Capsule                                                                                           | 2  | 304  | 0.41 (0.12 to 0.71)    | 0%; 1.21 ( $p=0.55$ )       |
| <b>Weight-to-height ratio (SMD)</b> 24 7901 0.05 (0.01 to 0.10) 20%; 34.96 ( $p=0.17$ )           |    |      |                        |                             |
| <b>Iron co-supplementation</b> ( $I^2=72\%$ ; $Chi^2=3.51$ , $p=0.06$ )                           |    |      |                        |                             |
| with iron                                                                                         | 8  | 1409 | 0.14 (0.03 to 0.24)    | 14%; 8.10 ( $p=0.32$ )      |
| without iron                                                                                      | 19 | 6262 | 0.03 (-0.02 to 0.08)   | 16%; 22.67 ( $p=0.25$ )     |
| <b>Age</b> ( $I^2=30\%$ ; $Chi^2=11.45$ , $p=0.18$ )                                              |    |      |                        |                             |
| 6m to 1y                                                                                          | 7  | 2559 | 0.03 (-0.04 to 0.11)   | 30%; 11.45 ( $p=0.18$ )     |
| 1y to 5y                                                                                          | 12 | 4302 | 0.02 (-0.05 to 0.08)   | 7%; 13.95 ( $p=0.38$ )      |
| 5y to 13y                                                                                         | 5  | 857  | 0.07 (-0.06 to 0.20)   | 0%; 3.20 ( $p=0.67$ )       |
| <b>Dose</b> ( $I^2=11\%$ ; $Chi^2=4.52$ , $p=0.34$ )                                              |    |      |                        |                             |
| 0mg to 5mg                                                                                        | 4  | 671  | 0.07 (-0.08 to 0.22)   | 0%; 1.02 ( $p=0.91$ )       |
| 5mg to 10mg                                                                                       | 6  | 1229 | 0.01 (-0.01 to 0.12)   | 30%; 7.16 ( $p=0.21$ )      |
| 10mg to 15mg                                                                                      | 10 | 2389 | 0.08 (-0.01 to 0.16)   | 47%; 18.79 ( $p=0.04$ )     |
| 15mg to 20mg                                                                                      | 1  | 194  | -0.22 (-0.50 to 0.06)  | Not applicable              |
| 20mg or more                                                                                      | 4  | 3576 | 0.06 (0.00 to 0.13)    | 0%; 2.43 ( $p=0.79$ )       |
| <b>Duration</b> ( $I^2=18.2\%$ ; $Chi^2=2.45$ , $p=0.29$ )                                        |    |      |                        |                             |
| 0m to 6m                                                                                          | 5  | 3337 | 0.07 (0.00 to 0.14)    | 0%; 2.14 ( $p=0.83$ )       |
| 6m to 12m                                                                                         | 15 | 4212 | 0.05 (-0.01 to 0.11)   | 38%; 27.40 ( $p=0.05$ )     |
| 12m or more                                                                                       | 4  | 352  | -0.10 (-0.31 to 0.11)  | 0%; 2.98 ( $p=0.56$ )       |
| <b>Formulation</b> ( $I^2=49\%$ ; $Chi^2=1.97$ , $p=0.16$ )                                       |    |      |                        |                             |
| Solution                                                                                          | 17 | 6019 | 0.06 (0.01 to 0.12)    | 0%; 20.92 ( $p=0.46$ )      |
| Pill/ tablet                                                                                      | 6  | 1652 | -0.01 (-0.11 to 0.08)  | 56%; 11.38 ( $p=0.04$ )     |
| <b>Plasma zinc (SMD)</b> 46 9810 0.62 (0.58 to 0.67) 91%; 582.45 ( $p<0.00001$ )                  |    |      |                        |                             |
| <b>Iron co-supplementation</b> ( $I^2=96\%$ ; $Chi^2=27.07$ , $p<0.00001$ )                       |    |      |                        |                             |
| with iron                                                                                         | 17 | 3231 | 0.47 (0.39 to 0.54)    | 82%; 90.82 ( $p<0.00001$ )  |
| without iron                                                                                      | 37 | 6579 | 0.70 (0.65 to 0.75)    | 92%; 464.56 ( $p<0.00001$ ) |
| <b>Age</b> ( $I^2=95\%$ ; $Chi^2=40.84$ , $p<0.00001$ )                                           |    |      |                        |                             |
| 6m to 1y                                                                                          | 8  | 2042 | 0.46 (0.37 to 0.55)    | 87%; 74.18 ( $p<0.00001$ )  |
| 1y to 5y                                                                                          | 19 | 4911 | 0.75 (0.69 to 0.81)    | 93%; 309.84 ( $p<0.00001$ ) |
| 5y to 13y                                                                                         | 17 | 2375 | 0.47 (0.38 to 0.55)    | 83%; 116.75 ( $p<0.00001$ ) |
| <b>Dose</b> ( $I^2=92\%$ ; $Chi^2=49.94$ , $p<0.00001$ )                                          |    |      |                        |                             |
| 0mg to 5mg                                                                                        | 4  | 855  | 0.35 (0.21 to 0.49)    | 26%; 6.72 ( $p=0.24$ )      |
| 5mg to 10mg                                                                                       | 8  | 1762 | 0.49 (0.40 to 0.59)    | 93%; 102.83 ( $p<0.00001$ ) |
| 10mg to 15mg                                                                                      | 20 | 4596 | 0.62 (0.56 to 0.68)    | 86%; 158.02 ( $p<0.00001$ ) |
| 15mg to 20mg                                                                                      | 6  | 535  | 0.76 (0.58 to 0.94)    | 86%; 51.51 ( $p<0.00001$ )  |
| 20mg or more                                                                                      | 6  | 1724 | 0.88 (0.78 to 0.98)    | 95%; 161.54 ( $p<0.00001$ ) |
| <b>Duration</b> ( $I^2=94\%$ ; $Chi^2=32.98$ , $p<0.00001$ )                                      |    |      |                        |                             |
| 0m to 6m                                                                                          | 15 | 3079 | 0.81 (0.73 to 0.88)    | 94%; 285.66 ( $p<0.00001$ ) |
| 6m to 12m                                                                                         | 22 | 4347 | 0.52 (0.46 to 0.58)    | 85%; 178.87 ( $p<0.00001$ ) |
| 12m or more                                                                                       | 9  | 2384 | 0.59 (0.50 to 0.67)    | 88%; 84.94 ( $p<0.00001$ )  |
| <b>Formulation</b> ( $I^2=98\%$ ; $Chi^2=149.23$ , $p<0.00001$ )                                  |    |      |                        |                             |
| Solution                                                                                          | 25 | 4741 | 0.78 (0.72 to 0.84)    | 90%; 293.32 ( $p<0.00001$ ) |
| Pill/ tablet                                                                                      | 12 | 3553 | 0.42 (0.35 to 0.49)    | 88%; 96.60 ( $p<0.00001$ )  |
| Capsule                                                                                           | 5  | 1115 | 1.07 (0.94 to 1.21)    | 88%; 56.53 ( $p<0.00001$ )  |
| Powder                                                                                            | 1  | 401  | -0.06 (-0.25 to 0.14)  | Not applicable              |
| <b>Prevalence of zinc deficiency (RR)</b> 15 5434 0.49 (0.45 to 0.53) 86%; 144.77 ( $p<0.00001$ ) |    |      |                        |                             |
| <b>Iron co-supplementation</b> ( $I^2=97\%$ ; $Chi^2=34.27$ , $p<0.00001$ )                       |    |      |                        |                             |
| with iron                                                                                         | 6  | 1704 | 0.62 (0.55 to 0.69)    | 69%; 16.19 ( $p=0.006$ )    |
| without iron                                                                                      | 14 | 3840 | 0.37 (0.33 to 0.42)    | 85%; 94.31 ( $p<0.00001$ )  |
| <b>Age</b> ( $I^2=92\%$ ; $Chi^2=24.36$ , $p<0.00001$ )                                           |    |      |                        |                             |
| 6m to 1y                                                                                          | 1  | 549  | 0.62 (0.54 to 0.70)    | 0%; 0.07 ( $p=0.79$ )       |
| 1y to 5y                                                                                          | 9  | 3761 | 0.41 (0.37 to 0.47)    | 91%; 116.81 ( $p<0.00001$ ) |
| 5y to 13y                                                                                         | 5  | 1234 | 0.31 (0.20 to 0.49)    | 0%; 3.53 ( $p=0.74$ )       |
| <b>Dose</b> ( $I^2=96\%$ ; $Chi^2=74.93$ , $p<0.00001$ )                                          |    |      |                        |                             |
| 5mg to 10mg                                                                                       | 3  | 1181 | 0.34 (0.27 to 0.44)    | 71%; 6.81 ( $p=0.03$ )      |
| 10mg to 15mg                                                                                      | 7  | 2890 | 0.57 (0.52 to 0.63)    | 81%; 48.40 ( $p<0.00001$ )  |
| 15mg to 20mg                                                                                      | 1  | 194  | 0.46 (0.24 to 0.89)    | 0%; 0.26 ( $p=0.61$ )       |
| 20mg or more                                                                                      | 4  | 1279 | 0.14 (0.10 to 0.19)    | 65%; 14.28 ( $p=0.01$ )     |

|                                                                                                                 |                     |    |      |                        |                             |
|-----------------------------------------------------------------------------------------------------------------|---------------------|----|------|------------------------|-----------------------------|
| <b>Duration</b> ( $I^2=97\%$ ; $Chi^2=71.67$ , $p<0.00001$ )                                                    |                     |    |      |                        |                             |
|                                                                                                                 | <i>0m to 6m</i>     | 6  | 2554 | 0.22 (0.18 to 0.27)    | 72%; 24.89 ( $p=0.0008$ )   |
|                                                                                                                 | <i>6m to 12m</i>    | 5  | 1043 | 0.59 (0.53 to 0.67)    | 35%; 9.19 ( $p=0.16$ )      |
|                                                                                                                 | <i>12m or more</i>  | 4  | 1947 | 0.55 (0.48 to 0.64)    | 87%; 39.02 ( $p<0.00001$ )  |
| <b>Formulation</b> ( $I^2=91\%$ ; $Chi^2=22.12$ , $p<0.00001$ )                                                 |                     |    |      |                        |                             |
|                                                                                                                 | <i>Solution</i>     | 7  | 2415 | 0.49 (0.44 to 0.54)    | 89%; 87.85 ( $p<0.00001$ )  |
|                                                                                                                 | <i>Pill/ tablet</i> | 7  | 2392 | 0.59 (0.50 to 0.68)    | 80%; 29.32 ( $p<0.0001$ )   |
|                                                                                                                 | <i>Capsule</i>      | 2  | 883  | 0.29 (0.23 to 0.37)    | 60%; 7.43 ( $p=0.06$ )      |
| <b>Blood haemoglobin (SMD)</b> <b>27</b> <b>6024</b> <b>-0.05 (-0.10 to 0.00)</b> <b>45%; 63.96 (p=0.002)</b>   |                     |    |      |                        |                             |
| <b>Iron co-supplementation</b> ( $I^2=0\%$ ; $Chi^2=0.70$ , $p=0.40$ )                                          |                     |    |      |                        |                             |
|                                                                                                                 | <i>with iron</i>    | 17 | 3098 | -0.01 (-0.08 to 0.07)  | 63%; 42.74 ( $p=0.0003$ )   |
|                                                                                                                 | <i>without iron</i> | 19 | 2913 | 0.04 (-0.04 to 0.11)   | 54%; 39.06 ( $p=0.003$ )    |
| <b>Age</b> ( $I^2=0\%$ ; $Chi^2=1.53$ , $p=0.46$ )                                                              |                     |    |      |                        |                             |
|                                                                                                                 | <i>6m to 1y</i>     | 7  | 2192 | -0.04 (-0.12 to 0.05)  | 69%; 32.49 ( $p=0.0003$ )   |
|                                                                                                                 | <i>1y to 5y</i>     | 12 | 2332 | 0.04 (-0.04 to 0.12)   | 62%; 33.89 ( $p=0.001$ )    |
|                                                                                                                 | <i>5y to 13y</i>    | 6  | 1286 | 0.01 (-0.11 to 0.13)   | 10%; 8.93 ( $p=0.35$ )      |
| <b>Dose</b> ( $I^2=0\%$ ; $Chi^2=2.12$ , $p=0.71$ )                                                             |                     |    |      |                        |                             |
|                                                                                                                 | <i>0mg to 5mg</i>   | 4  | 966  | 0.01 (-0.12 to 0.14)   | 39%; 8.16 ( $p=0.15$ )      |
|                                                                                                                 | <i>5mg to 10mg</i>  | 2  | 306  | -0.01 (-0.23 to 0.21)  | 0%; 0.56 ( $p=0.45$ )       |
|                                                                                                                 | <i>10mg to 15mg</i> | 16 | 3452 | 0.01 (-0.06 to 0.08)   | 58%; 44.83 ( $p=0.0007$ )   |
|                                                                                                                 | <i>15mg to 20mg</i> | 4  | 364  | -0.04 (-0.24 to 0.17)  | 25%; 5.31 ( $p=0.26$ )      |
|                                                                                                                 | <i>20mg or more</i> | 3  | 1025 | 0.10 (-0.02 to 0.22)   | 83%; 23.74 ( $p<0.00001$ )  |
| <b>Duration</b> ( $I^2=52\%$ ; $Chi^2=4.20$ , $p=0.12$ )                                                        |                     |    |      |                        |                             |
|                                                                                                                 | <i>0m to 6m</i>     | 7  | 672  | 0.17 (0.01 to 0.33)    | 74%; 27.23 ( $p=0.0003$ )   |
|                                                                                                                 | <i>6m to 12m</i>    | 14 | 3738 | -0.01 (-0.08 to 0.06)  | 39%; 27.71 ( $p=0.05$ )     |
|                                                                                                                 | <i>12m or more</i>  | 7  | 1601 | 0.01 (-0.09 to 0.11)   | 61%; 23.36 ( $p=0.005$ )    |
| <b>Formulation</b> ( $I^2=0\%$ ; $Chi^2=1.38$ , $p=0.71$ )                                                      |                     |    |      |                        |                             |
|                                                                                                                 | <i>Solution</i>     | 15 | 2990 | 0.01 (-0.06 to 0.08)   | 64%; 52.48 ( $p<0.00001$ )  |
|                                                                                                                 | <i>Pill/ tablet</i> | 8  | 1605 | 0.01 (-0.09 to 0.12)   | 67%; 24.34 ( $p=0.002$ )    |
|                                                                                                                 | <i>Capsule</i>      | 4  | 989  | 0.07 (-0.06 to 0.20)   | 0%; 4.31 ( $p=0.51$ )       |
|                                                                                                                 | <i>Powder</i>       | 1  | 427  | -0.07 (-0.26 to 0.12)  | Not applicable              |
| <b>Prevalence of anaemia (RR)</b> <b>13</b> <b>4287</b> <b>1.00 (0.95 to 1.06)</b> <b>37%; 28.52 (p=0.05)</b>   |                     |    |      |                        |                             |
| <b>Iron co-supplementation</b> ( $I^2=0\%$ ; $Chi^2=0.01$ , $p=0.93$ )                                          |                     |    |      |                        |                             |
|                                                                                                                 | <i>with iron</i>    | 10 | 2755 | 1.00 (0.91 to 1.09)    | 58%; 21.20 ( $p=0.01$ )     |
|                                                                                                                 | <i>without iron</i> | 9  | 1532 | 1.00 (0.93 to 1.08)    | 0%; 7.31 ( $p=0.50$ )       |
| <b>Age</b> ( $I^2=8\%$ ; $Chi^2=2.17$ , $p=0.34$ )                                                              |                     |    |      |                        |                             |
|                                                                                                                 | <i>6m to 1y</i>     | 6  | 1726 | 1.01 (0.95 to 1.08)    | 39%; 11.43 ( $p=0.12$ )     |
|                                                                                                                 | <i>1y to 5y</i>     | 6  | 2161 | 0.99 (0.88 to 1.12)    | 50%; 14.07 ( $p=0.05$ )     |
|                                                                                                                 | <i>5y to 13y</i>    | 2  | 400  | 0.73 (0.47 to 1.12)    | 0%; 0.84 ( $p=0.66$ )       |
| <b>Dose</b> ( $I^2=68\%$ ; $Chi^2=12.56$ , $p=0.01$ )                                                           |                     |    |      |                        |                             |
|                                                                                                                 | <i>0mg to 5mg</i>   | 2  | 616  | 1.01 (0.94 to 1.09)    | 31%; 2.91 ( $p=0.23$ )      |
|                                                                                                                 | <i>5mg to 10mg</i>  | 1  | 208  | 0.94 (0.47 to 1.87)    | Not applicable              |
|                                                                                                                 | <i>10mg to 15mg</i> | 8  | 3069 | 1.01 (0.92 to 1.11)    | 15%; 13.00 ( $p=0.29$ )     |
|                                                                                                                 | <i>15mg to 20mg</i> | 1  | 181  | 0.76 (0.40 to 1.46)    | Not applicable              |
|                                                                                                                 | <i>20mg or more</i> | 1  | 213  | 0.17 (0.06 to 0.46)    | Not applicable              |
| <b>Duration</b> ( $I^2=83\%$ ; $Chi^2=11.42$ , $p=0.003$ )                                                      |                     |    |      |                        |                             |
|                                                                                                                 | <i>0m to 6m</i>     | 2  | 325  | 0.18 (0.06 to 0.48)    | 0%; 0.39 ( $p=0.53$ )       |
|                                                                                                                 | <i>6m to 12m</i>    | 7  | 1989 | 1.01 (0.94 to 1.08)    | 40%; 13.33 ( $p=0.10$ )     |
|                                                                                                                 | <i>12m or more</i>  | 5  | 1973 | 1.00 (0.90 to 1.12)    | 0%; 3.38 ( $p=0.85$ )       |
| <b>Formulation</b> ( $I^2=7\%$ ; $Chi^2=3.21$ , $p=0.36$ )                                                      |                     |    |      |                        |                             |
|                                                                                                                 | <i>Solution</i>     | 4  | 1115 | 0.90 (0.78 to 1.04)    | 73%; 18.87 ( $p=0.002$ )    |
|                                                                                                                 | <i>Pill/ tablet</i> | 6  | 1958 | 1.02 (0.95 to 1.10)    | 0%; 3.36 ( $p=0.85$ )       |
|                                                                                                                 | <i>Capsule</i>      | 2  | 886  | 1.00 (0.88 to 1.13)    | 3%; 3.08 ( $p=0.38$ )       |
|                                                                                                                 | <i>Powder</i>       | 1  | 328  | 1.19 (0.81 to 1.73)    | Not applicable              |
| <b>Plasma ferritin (SMD)</b> <b>19</b> <b>4474</b> <b>0.07 (0.00 to 0.13)</b> <b>95%; 480.50 (p&lt;0.00001)</b> |                     |    |      |                        |                             |
| <b>Iron co-supplementation</b> ( $I^2=91\%$ ; $Chi^2=11.08$ , $p=0.0009$ )                                      |                     |    |      |                        |                             |
|                                                                                                                 | <i>with iron</i>    | 14 | 2765 | -0.05 (-0.13 to 0.02)  | 80%; 64.00 ( $p<0.00001$ )  |
|                                                                                                                 | <i>without iron</i> | 11 | 1709 | -0.27 (-0.38 to 0.17)  | 97%; 389.92 ( $p<0.00001$ ) |
| <b>Age</b> ( $I^2=0\%$ ; $Chi^2=1.02$ , $p=0.60$ )                                                              |                     |    |      |                        |                             |
|                                                                                                                 | <i>6m to 1y</i>     | 4  | 1166 | -0.14 (-0.26 to 0.03)  | 20%; 6.26 ( $p=0.28$ )      |
|                                                                                                                 | <i>1y to 5y</i>     | 9  | 2716 | -0.16 (-0.24 to 0.08)  | 98%; 439.66 ( $p<0.00001$ ) |
|                                                                                                                 | <i>5y to 13y</i>    | 5  | 534  | -0.05 (-0.24 to 0.15)  | 47%; 11.30 ( $p=0.08$ )     |
| <b>Dose</b> ( $I^2=79\%$ ; $Chi^2=18.71$ , $p=0.0009$ )                                                         |                     |    |      |                        |                             |
|                                                                                                                 | <i>0mg to 5mg</i>   | 3  | 371  | -0.07 (-0.28 to 0.14)  | 29%; 4.21 ( $p=0.24$ )      |
|                                                                                                                 | <i>5mg to 10mg</i>  | 1  | 78   | -0.15 (-0.63 to 0.34)  | Not applicable              |
|                                                                                                                 | <i>10mg to 15mg</i> | 11 | 3171 | -0.20 (-0.28 to -0.13) | 97%; 428.29 ( $p<0.00001$ ) |
|                                                                                                                 | <i>15mg to 20mg</i> | 3  | 314  | -0.14 (-0.36 to 0.08)  | 0%; 2.05 ( $p=0.56$ )       |
|                                                                                                                 | <i>20mg or more</i> | 3  | 652  | 0.17 (0.02 to 0.33)    | 79%; 14.57 ( $p=0.002$ )    |
| <b>Duration</b> ( $I^2=92\%$ ; $Chi^2=26.28$ , $p<0.00001$ )                                                    |                     |    |      |                        |                             |
|                                                                                                                 | <i>0m to 6m</i>     | 7  | 902  | 0.06 (-0.07 to 0.20)   | 79%; 32.68 ( $p<0.0001$ )   |
|                                                                                                                 | <i>6m to 12m</i>    | 7  | 1735 | -0.07 (-0.17 to 0.03)  | 28%; 12.55 ( $p=0.18$ )     |
|                                                                                                                 | <i>12m or more</i>  | 4  | 1779 | -0.34 (-0.45 to 0.24)  | 99%; 386.75 ( $p<0.00001$ ) |
| <b>Formulation</b> ( $I^2=92\%$ ; $Chi^2=35.34$ , $p<0.00001$ )                                                 |                     |    |      |                        |                             |
|                                                                                                                 | <i>Solution</i>     | 10 | 2043 | 0.01 (-0.08 to 0.10)   | 62%; 34.20 ( $p=0.001$ )    |
|                                                                                                                 | <i>Pill/ tablet</i> | 3  | 1070 | -0.16 (-0.29 to -0.04) | 89%; 17.89 ( $p=0.0001$ )   |

|                                                                                           |                     |   |      |                        |                         |
|-------------------------------------------------------------------------------------------|---------------------|---|------|------------------------|-------------------------|
|                                                                                           | <i>Capsule</i>      | 3 | 939  | -0.54 (-0.69 to -0.38) | 99%; 364.74 (p<0.00001) |
|                                                                                           | <i>Powder</i>       | 1 | 317  | -0.18 (-0.40 to 0.04)  | Not applicable          |
| <b>Prevalence of iron deficiency (RR) 10 3149 0.99 (0.89 to 1.10) 15%; 16.44 (p=0.29)</b> |                     |   |      |                        |                         |
| <i>Iron co-supplementation (I<sup>2</sup>=0%; Chi<sup>2</sup>=0.51, p=0.48)</i>           |                     |   |      |                        |                         |
|                                                                                           | <i>with iron</i>    | 9 | 2301 | 1.02 (0.89 to 1.17)    | 47%; 15.03 (p=0.06)     |
|                                                                                           | <i>without iron</i> | 6 | 947  | 0.94 (0.79 to 1.11)    | 0%; 0.90 (p=0.97)       |
| <i>Age (I<sup>2</sup>=44%; Chi<sup>2</sup>=3.56, p=0.17)</i>                              |                     |   |      |                        |                         |
|                                                                                           | <i>6m to 1y</i>     | 3 | 905  | 0.92 (0.82 to 1.05)    | 25%; 5.34 (p=0.25)      |
|                                                                                           | <i>1y to 5y</i>     | 4 | 1992 | 1.16 (0.94 to 1.44)    | 13%; 5.75 (p=0.33)      |
|                                                                                           | <i>5y to 13y</i>    | 2 | 351  | 1.12 (0.61 to 2.04)    | 0%; 1.80 (p=0.62)       |
| <i>Dose (I<sup>2</sup>=49%; Chi<sup>2</sup>=5.86, p=0.12)</i>                             |                     |   |      |                        |                         |
|                                                                                           | <i>0mg to 5mg</i>   | 1 | 144  | 0.78 (0.61 to 1.00)    | Not applicable          |
|                                                                                           | <i>10mg to 15mg</i> | 6 | 2634 | 1.03 (0.91 to 1.16)    | 14%; 10.42 (p=0.32)     |
|                                                                                           | <i>15mg to 20mg</i> | 1 | 194  | 1.07 (0.52 to 2.18)    | Not applicable          |
|                                                                                           | <i>20mg or more</i> | 2 | 276  | 2.16 (0.72 to 6.44)    | 0%; 0.15 (p=0.93)       |
| <i>Duration (I<sup>2</sup>=52%; Chi<sup>2</sup>=4.12, p=0.13)</i>                         |                     |   |      |                        |                         |
|                                                                                           | <i>0m to 6m</i>     | 2 | 276  | 2.16 (0.72 to 6.44)    | 0%; 0.15 (p=0.93)       |
|                                                                                           | <i>6m to 12m</i>    | 3 | 981  | 0.88 (0.73 to 1.05)    | 22%; 5.13 (p=0.27)      |
|                                                                                           | <i>12m or more</i>  | 4 | 1991 | 1.04 (0.91 to 1.18)    | 15%; 7.04 (p=0.32)      |
| <i>Formulation (I<sup>2</sup>=0%; Chi<sup>2</sup>=1.87, p=0.39)</i>                       |                     |   |      |                        |                         |
|                                                                                           | <i>Solution</i>     | 4 | 1163 | 0.90 (0.75 to 1.08)    | 18%; 7.31 (p=0.29)      |
|                                                                                           | <i>Pill/ tablet</i> | 3 | 1199 | 1.05 (0.91 to 1.20)    | 51%; 6.17 (p=0.10)      |
|                                                                                           | <i>Capsule</i>      | 2 | 886  | 0.88 (0.56 to 1.37)    | 0%; 1.09 (p=0.78)       |
| <b>Plasma copper (SMD) 11 3071 -0.22 (-0.29 to 0.14) 68%; 37.47 (p=0.0002)</b>            |                     |   |      |                        |                         |
| <i>Iron co-supplementation (I<sup>2</sup>=64.1%; Chi<sup>2</sup>=2.71, p=0.09)</i>        |                     |   |      |                        |                         |
|                                                                                           | <i>with iron</i>    | 4 | 650  | -0.10 (-0.25 to 0.05)  | 0%; 2.45 (p=0.49)       |
|                                                                                           | <i>without iron</i> | 9 | 2421 | -0.25 (-0.33 to -0.17) | 75%; 32.34 (p<0.00001)  |
| <i>Age (I<sup>2</sup>=71%; Chi<sup>2</sup>=3.46, p=0.06)</i>                              |                     |   |      |                        |                         |
|                                                                                           | <i>6m to 1y</i>     | 3 | 865  | -0.11 (-0.24 to 0.02)  | 0%; 1.27 (p=0.87)       |
|                                                                                           | <i>5y to 13y</i>    | 8 | 2206 | -0.26 (-0.35 to -0.17) | 79%; 32.74 (p<0.00001)  |
| <i>Dose (I<sup>2</sup>=90%; Chi<sup>2</sup>=29.23, p&lt;0.00001)</i>                      |                     |   |      |                        |                         |
|                                                                                           | <i>0mg to 5mg</i>   | 3 | 410  | -0.08 (-0.27 to 0.12)  | 25%; 4.00 (p=0.26)      |
|                                                                                           | <i>5mg to 10mg</i>  | 2 | 519  | -0.31 (-0.49 to -0.13) | 75%; 3.98 (p=0.05)      |
|                                                                                           | <i>10mg to 15mg</i> | 7 | 1310 | -0.01 (-0.12 to 0.10)  | 0%; 5.40 (p=0.61)       |
|                                                                                           | <i>20mg or more</i> | 1 | 930  | -0.46 (-0.59 to -0.33) | Not applicable          |
| <i>Duration (I<sup>2</sup>=94%; Chi<sup>2</sup>=30.84, p&lt;0.00001)</i>                  |                     |   |      |                        |                         |
|                                                                                           | <i>0m to 6m</i>     | 2 | 1355 | -0.44 (-0.55 to -0.33) | 0%; 0.17 (p=0.68)       |
|                                                                                           | <i>6m to 12m</i>    | 5 | 1168 | -0.08 (-0.20 to 0.04)  | 0%; 3.23 (p=0.78)       |
|                                                                                           | <i>12m or more</i>  | 4 | 548  | 0.06 (-0.11 to 0.24)   | 7%; 3.23 (p=0.36)       |
| <i>Formulation (I<sup>2</sup>=95%; Chi<sup>2</sup>=20.76, p&lt;0.00001)</i>               |                     |   |      |                        |                         |
|                                                                                           | <i>Solution</i>     | 9 | 2490 | -0.37 (-0.46 to -0.29) | 97%; 370.26 (p<0.00001) |
|                                                                                           | <i>Pill/ tablet</i> | 3 | 439  | -0.83 (-1.01 to -0.65) | 99%; 277.02 (p<0.00001) |

## Appendix 7: Additional forest plots

## Incidence of lower respiratory tract infection

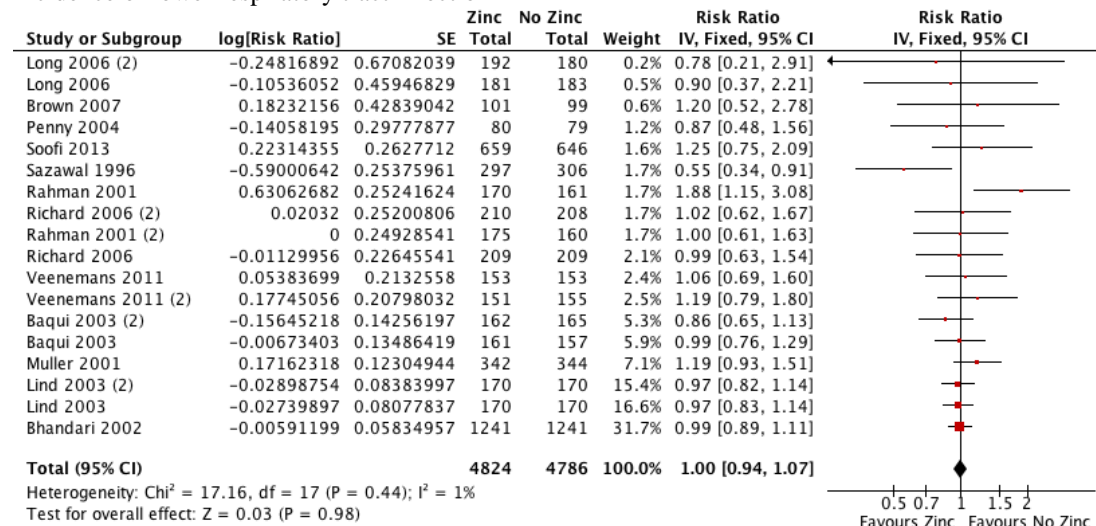

## Incidence of malaria

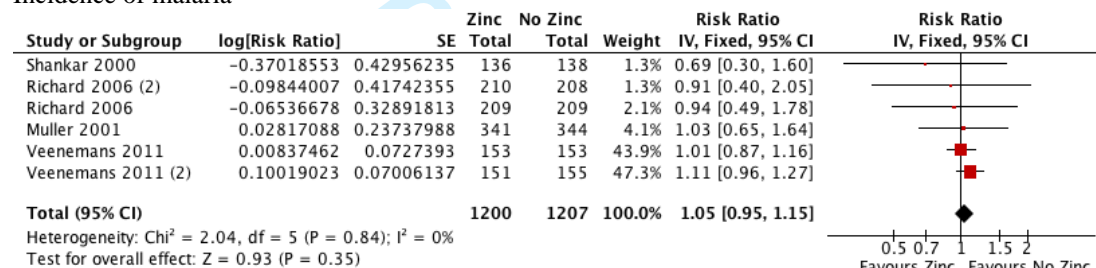Participants with  $\geq 1$  vomiting episode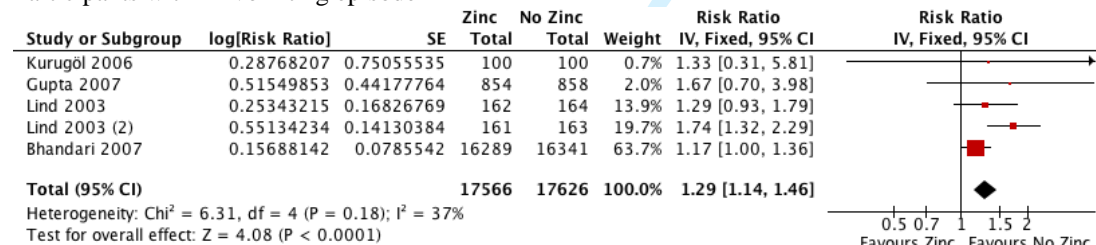

Plasma zinc

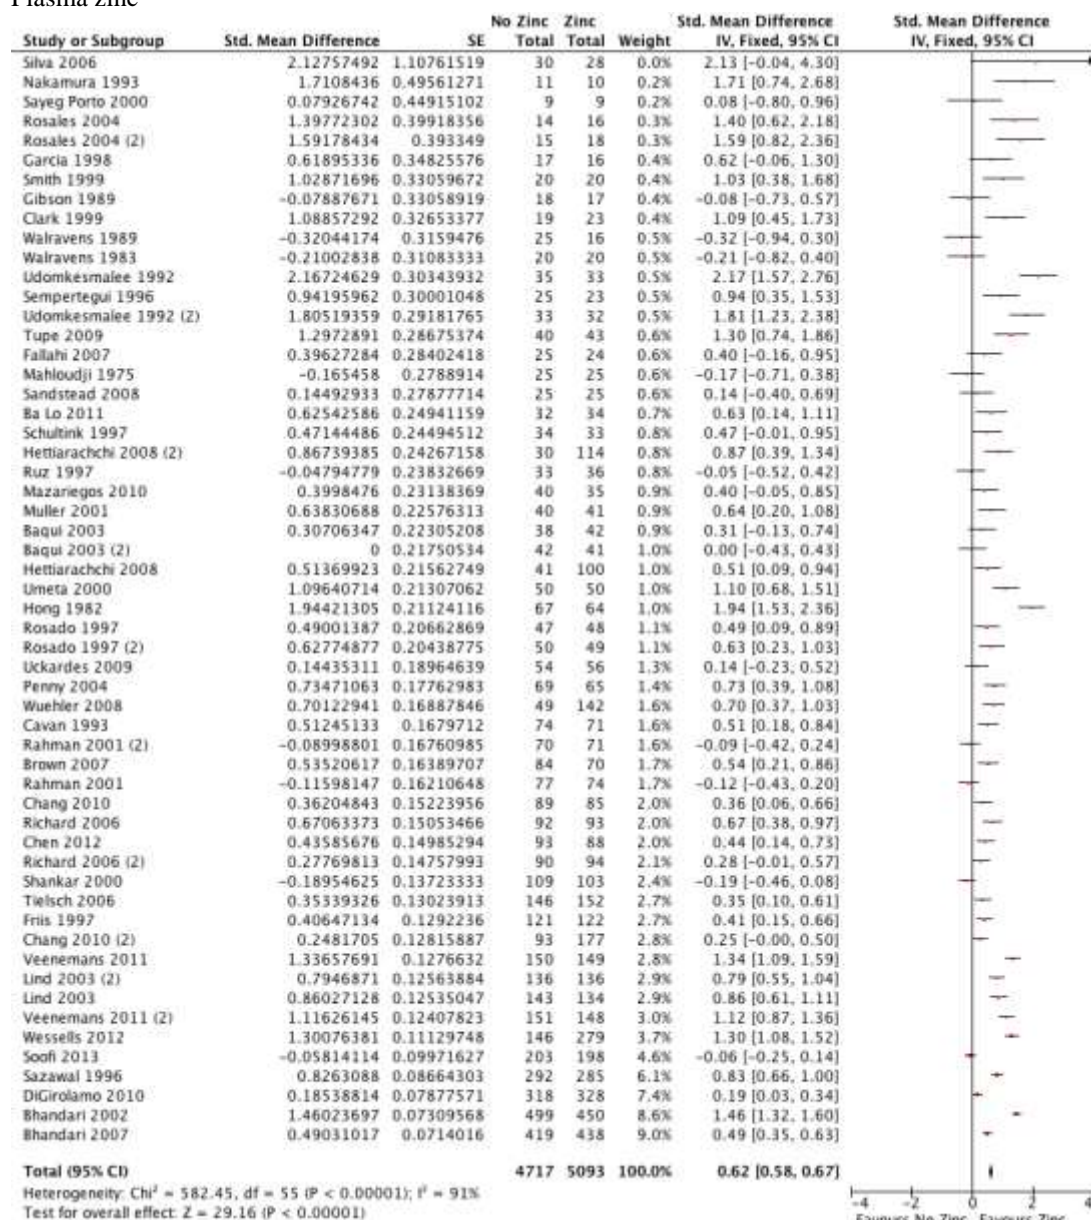

Appendix 8: Tests for reporting bias

All cause mortality funnel plot (observed and imputed studies)

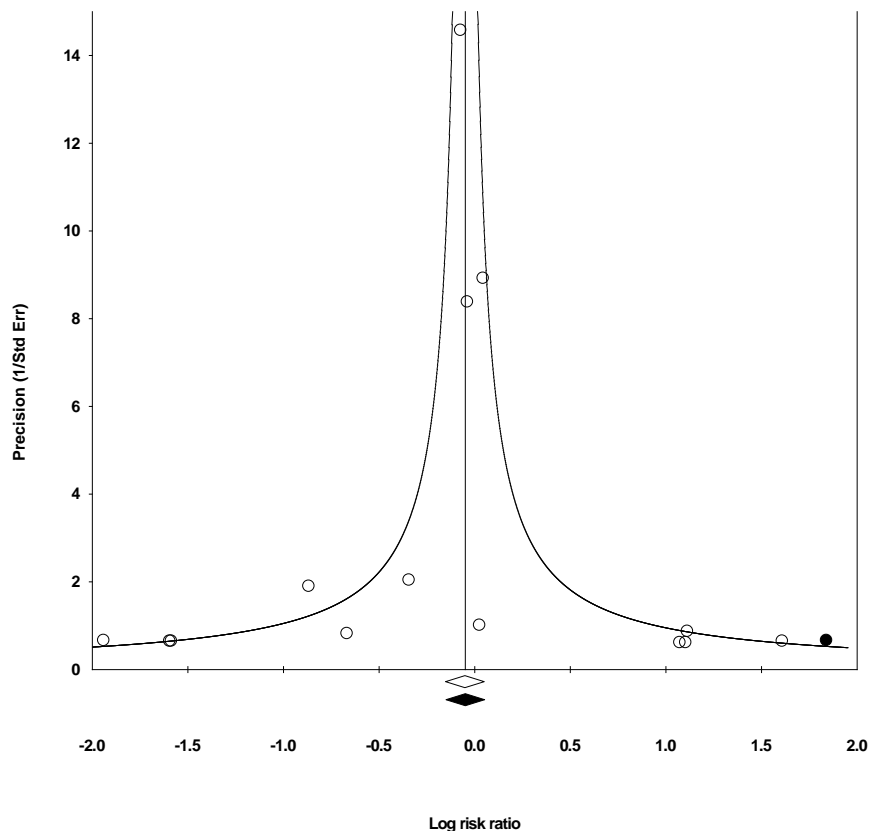

Incidence of LRTI (observed and imputed studies)

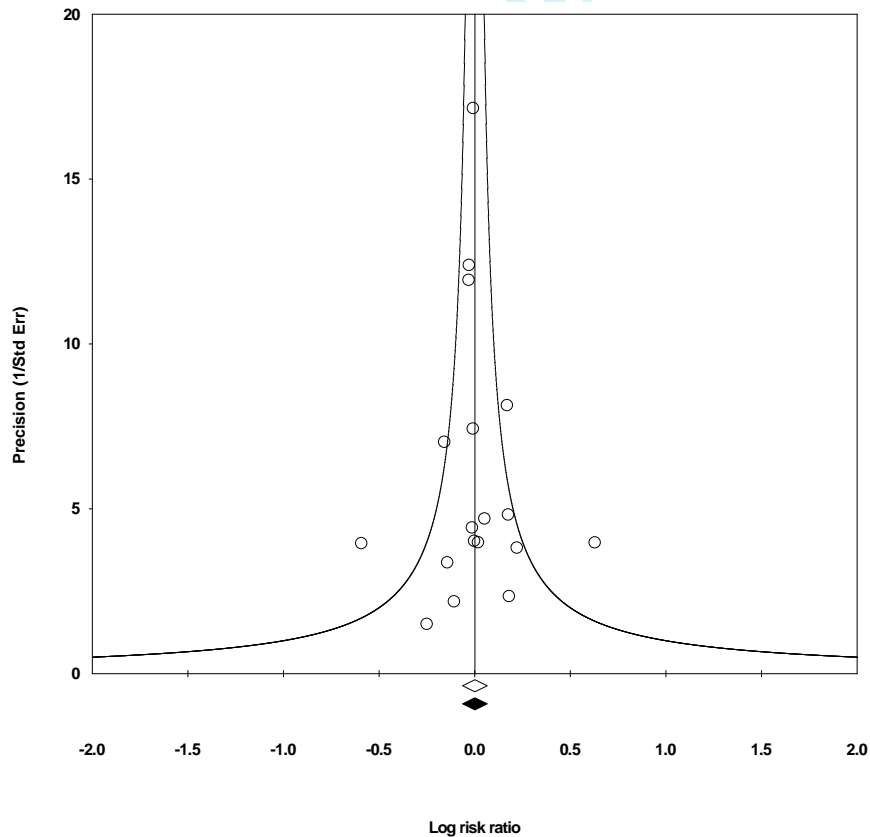

Height (observed and imputed studies)

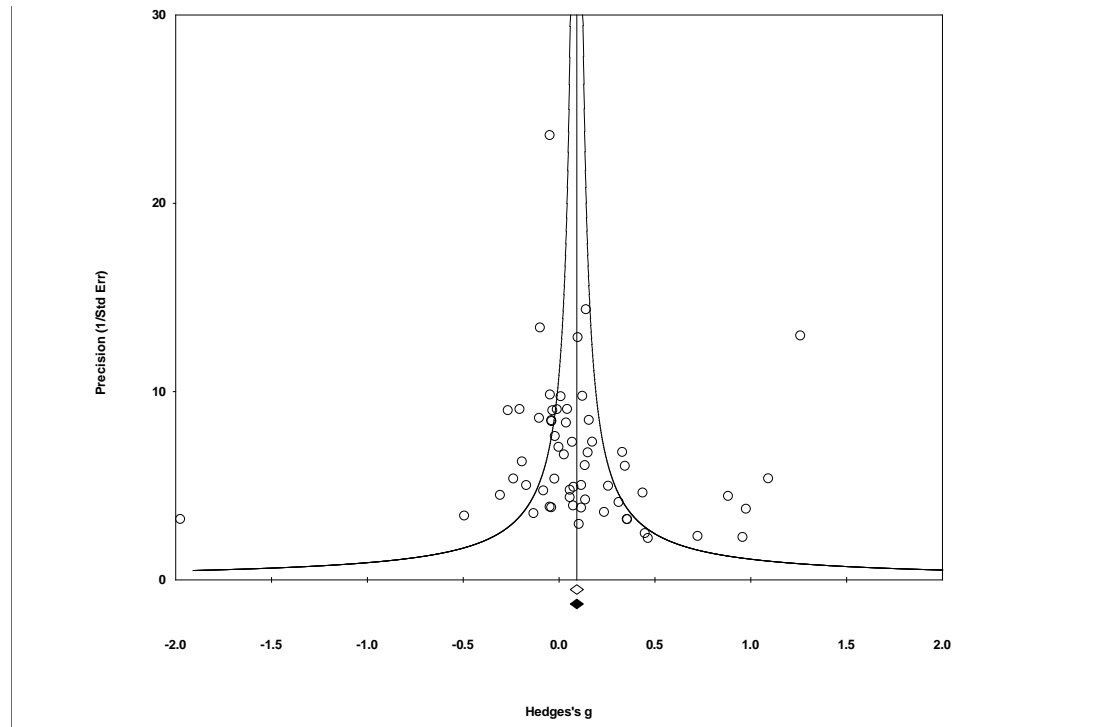

## REFERENCES

1. Ahmed T, Svennerholm AM, Al Tarique A, Sultana GN, Qadri F. Enhanced immunogenicity of an oral inactivated cholera vaccine in infants in Bangladesh obtained by zinc supplementation and by temporary withholding breast-feeding. *Vaccine*. 2009; **27**(9): 1433-9.
2. Bates CJ, Evans PH, Dardenne M, Prentice A, Lunn PG, Northrop-Clewes CA, et al. A trial of zinc supplementation in young rural Gambian children. *British Journal of Nutrition*. 1993; **69**(1): 243-55.
3. Behrens RH, Tomkins AM, Roy SK. Zinc supplementation during diarrhoea, a fortification against malnutrition? *Lancet*. 1990; **336**(18): 442-3.
4. Berger J, Ninh NX, Khan NC, Nhien NV, Lien DK, Trung NQ, et al. Efficacy of combined iron and zinc supplementation on micronutrient status and growth in Vietnamese infants. *European Journal of Clinical Nutrition*. 2006; **60**(4): 443-54.
5. Dijkhuizen MA, Winichagoon P, Wieringa FT, Wasantwisut E, Utomo B, Ninh NX, et al. Zinc supplementation improved length growth only in anemic infants in a multi-country trial of iron and zinc supplementation in South-East Asia. *Journal of Nutrition*. 2008; **138**(10): 1969-75.
6. Wieringa FT, Berger J, Dijkhuizen MA, Hidayat A, Ninh NX, Utomo B, et al. Combined iron and zinc supplementation in infants improved iron and zinc status, but interactions reduced efficacy in a multicountry trial in Southeast Asia. *Journal of Nutrition*. 2007; **137**(2): 466-71.
7. Brooks WA, Santosham M, Naheed A, Goswami D, Wahed MA, Diener-West M, et al. Effect of weekly zinc supplements on incidence of pneumonia and diarrhoea in children younger than 2 years in an urban, low-income population in Bangladesh: Randomised controlled trial. *Lancet*. 2005; **366**(9490): 999-1004.
8. Campos Junior D, Veras Neto MC, Silva Filho VL, Leite MF, Holanda MBS, Cunha NF. Zinc supplementation may recover taste for salt meals. *Jornal de Pediatria*. 2004; **80**(1): 55-9.
9. Cuevas LE, Almeida LMD, Mazunder P, Paixao AC, Silva AM, Maciel L, et al. Effect of zinc on the tuberculin response of children exposed to adults with smear-positive tuberculosis. *Annals of Tropical Paediatrics*. 2002; **22**(4): 313-9.
10. Duggan C, Penny ME, Hibberd P, Gil A, Huapaya A, Cooper A, et al. Oligofructose-supplemented infant cereal: 2 randomized, blinded, community-based trials in Peruvian infants. *The American journal of clinical nutrition*. 2003; **77**(4): 937-42.
11. Fahmida U, Rumawas JSP, Utomo B, Patmonodewo S, Schultink W. Zinc-iron, but not zinc-alone supplementation, increased linear growth of stunted infants with low haemoglobin. *Asia Pacific Journal of Clinical Nutrition*. 2007; **16**(2): 301-9.
12. Hashemipour M, Kelishadi R, Shapouri J. Effect of zinc supplementation on insulin resistance and components of the metabolic syndrome in prepubescent obese children. *Pediatric Diabetes*. 2009; **10**: 94.
13. Hashemipour M, Kelishadi R, Shapouri J, Sarrafzadegan N, Amini M, Tavakoli N, et al. Effect of zinc supplementation on insulin resistance and components of the metabolic syndrome in prepubertal obese children. *Hormones*. 2009; **8**(4): 279-85.
14. Kelishadi R, Hashemipour M, Adeli K, Tavakoli N, Movahedian-Attar A, Shapouri J, et al. Effect of zinc supplementation on markers of insulin resistance, oxidative stress, and inflammation among prepubescent children with metabolic syndrome. *Metab*. 2010; **8**(6): 505-10.
15. Heinig MJ, Brown KH, Lonnerdal B, Dewey KG. Zinc supplementation does not affect growth, morbidity, or motor development of US term breastfed infants at 4-10 mo of age. *American Journal of Clinical Nutrition*. 2006; **84**(3): 594-601.
16. Heinig MJ, Brown KH, Lonnerdal B, Dewey KG. Zinc supplementation does not affect growth, morbidity, or motor development of U.S. breastfed infants at 4-10 mo. *FASEB Journal*. 1998; **12**(A970): Abstract 5617.
17. Hess SY, Bado L, Aaron GJ, Ouedraogo JB, Zeilani M, Brown KH. Acceptability of zinc-fortified, lipid-based nutrient supplements (LNS) prepared for young children in Burkina Faso. *Maternal and Child Nutrition*. 2011; **7**(4): 357-67.



18. Imamoglu S, Bereket A, Turan S, Taga Y, Haklar G. Effect of zinc supplementation on growth hormone secretion, IGF-I, IGFBP-3, somatomedin generation, alkaline phosphatase, osteocalcin and growth in prepubertal children with idiopathic short stature. *J Pediatr Endocrinol*. 2005; **18**(1): 69-74.
19. Rosado JL, Lopez P, Kordas K, Garcia-Vargas G, Ronquillo D, Alatorre J, et al. Iron and/or zinc supplementation did not reduce blood lead concentrations in children in a randomized, placebo-controlled trial. *Journal of Nutrition*. 2006; **136**(9): 2378-83.
20. Rico JA, Kordas K, Lopez P, Rosado JL, Garcia Vargas G, Ronquillo D, et al. Efficacy of iron and/or zinc supplementation on cognitive performance of lead-exposed Mexican schoolchildren: a randomized, placebo-controlled trial. *Pediatrics*. 2006; **117**(3): e518-e27.
21. Kordas K, Stoltzfus RJ, Lopez P, Alatorre Rico J, Rosado JL. Iron and zinc supplementation does not improve parent or teacher ratings of behavior in first grade Mexican children exposed to lead. *Journal of Pediatrics*. 2005; **147**(5): 632-9.
22. NCT01472211. Water-based Zinc Intervention Trial in Zinc Deficient Children. 2012.
23. Osendarp SJM, Santosham M, Black RE, Wahed MA, Raaij JMAv, Fuchs GJ. Effect of zinc supplementation between 1 and 6 mo of life on growth and morbidity of Bangladeshi infants in urban slums. *American Journal of Clinical Nutrition*. 2002; **76**(6): 1401-8.
24. Payne-Robinson HM, Golden MH, Golden BE, Simeon DT. The zinc sandwich and growth. *Lancet*. 1991; **337**(8746): 925-6.
25. Perrone L, Salerno M, Gialanella G, Feng SL, Moro R, Di Lascio R, et al. Long-term zinc and iron supplementation in children of short stature: effect of growth and on trace element content in tissues. *Journal of Trace Elements in Medicine & Biology*. 1999; **13**(1-2): 51-6.
26. Ronaghy H, Fox MR, Garnsm, Israel H, Harp A, Moe PG, et al. Controlled zinc supplementation for malnourished school boys: a pilot experiment. *American Journal of Clinical Nutrition*. 1969; **22**(10): 1279-89.
27. Ronaghy HA, Reinhold JG, Mahludji M, Ghavami P, Fox MR, Halsted JA. Zinc supplementation of malnourished schoolboys in Iran: increased growth and other effects. *American Journal of Clinical Nutrition*. 1974; **27**(2): 112-21.
28. Roxas BV, Intengan CL, Juliano BO. Effect of zinc supplementation and high-protein rice on the growth of preschool children on a rice-based diet. *Qualitas Plantarum*. 1980; **30**(3/4): 213-22.
29. Shingwekar AG, Mohanram M, Reddy V. Effect of zinc supplementation on plasma levels of vitamin A and retinol-binding protein in malnourished children. *Clinica Chimica Acta*. 1979; **93**(1): 97-100.
30. Shrivastava SP, Roy AK, Jana UK. Zinc supplementation in protein energy malnutrition. *Indian Pediatrics*. 1993; **30**(6): 779-82.
31. Walravens PA, Chakar A, Mokni R, Denise J, Lemonnier D. Zinc supplements in breastfed infants. *Lancet*. 1992; **340**(8821): 683-5.
32. Wasantwisut E, Winichagoon P, Chitchumroonchokchai C, Yamborisut U, Boonpraderm A, Pongcharoen T, et al. Iron and zinc supplementation improved iron and zinc status, but not physical growth, of apparently healthy, breast-fed infants in rural communities of northeast Thailand. *Journal of Nutrition*. 2006; **136**(9): 2405-11.
33. Yanfeng X, Ling W, Jing Y, Rong Z. The effect of status of zinc, calcium on growth of children aged 3~6 years in Xi'an and analysis of effectiveness of zinc supplement. *Journal of Xi'an Medical University, English Edition*. 1997; **9**(1): 48-51.
34. Zeba AN, Sorgho H, Rouamba N, Zongo I, Rouamba J, Guiguemde RT, et al. Major reduction of malaria morbidity with combined vitamin A and zinc supplementation in young children in Burkina Faso: a randomized double blind trial. *Nutrition Journal*. 2008; **7**: 7.
35. Arabaci FI, Kaya A, Gultekin A, Icagasoglu FD, Mutlu EC. Comparison of efficacies of divalent, trivalent irons and divalent iron plus zinc preparations in paediatric patients with iron deficiency anemia. *Turkiye Klinikleri Pediatri*. 2010; **19**(3): 210-5.
36. Chicourel EZ. Efeito Da Suplementação No Desenvolvimento Físico E Cognitivo De Pré-Escolares. São Paulo, Brazil: Universidade de São Paulo; 2001.
37. CTRI/2010/091/001417. A clinical trial to study the effect of zinc sulfate in reducing the incidence of diarrhea, acute respiratory tract infections and in promoting growth in infants of 6-11 months of age.

- 1 38. Jimenez R, Sagaro E, Lafita Y. How growth infants supplemented with zinc sulfate  
2 after an episode of persistent diarrhea. *Journal of Pediatric Gastroenterology & Nutrition*;  
3 2000. p. S26.
- 4 39. Mitter SS, Havt A, Moore SR, Mota RM, Oria RB, Guerrant RL, et al. Zinc  
5 supplementation exposes associations between the interleukin 8 (-251 A/T) polymorphism  
6 and markers for higher intestinal inflammation in children from Northeast Brazil. *American*  
7 *Journal of Tropical Medicine and Hygiene*. 2009; **1**): 23-4.
- 8 40. NCT00133406. Long-term impact and intervention for diarrhea in Brazil.
- 9 41. NCT00228254. Vitamin A and zinc: prevention of pneumonia (VAZPOP) study.
- 10 42. NCT00374023. A Study on Immunological Effect of Vitamin A and Zinc in a Placebo  
11 Controlled 4 Cell Trial.
- 12 43. NCT00421668. A Trial of Zinc and Micronutrients in Tanzanian Children.
- 13 44. NCT00589264. Zinc and biobehavioral development in early childhood.
- 14 45. NCT00944359. Impact of preventive and therapeutic zinc supplementation programs  
15 among young children.
- 16 46. NCT00967551. Micronutrient Sprinkles in a Daycare Center.
- 17 47. NCT00980421. Safety of various mode of delivery of iron supplement on iron toxicity  
18 markers in preschool children.
- 19 48. NCT01306097. Zinc Supplementation and Severe and Recurrent Diarrhea.
- 20 49. NCT01616693. Zinc and/or Probiotic Supplementation of Rotavirus and Oral Polio  
21 Virus Vaccines.
- 22 50. Smith RM, King RA, Spargo RM, Cheek DB, Field JB, Veitch LG. Growth-retarded  
23 Aboriginal children with low plasma zinc levels do not show a growth response to  
24 supplementary zinc. *Lancet*. 1985; **i**(8434): 923-4.
- 25 51. Ahmed T, Arifuzzaman M, Lebens M, Qadri F, Lundgren A. CD4+ T-cell responses to  
26 an oral inactivated cholera vaccine in young children in a cholera endemic country and the  
27 enhancing effect of zinc supplementation. *Vaccine*. 2009; **28**(2): 422-9.
- 28 52. Akramuzzaman SM, Mahalanabis D, Mitra AK, Rahman MM. Effect of long-term  
29 supplementation of zinc in undernourished young children of a poor periurban community in  
30 Bangladesh [abstract]. *J-Gastroenterol-Hepato*; 1994. p. A132.
- 31 53. Alarcon K, Kolsteren PW, Prada AM, Chian AM, Velarde RE, Pecho IL, et al. Effects  
32 of separate delivery of zinc or zinc and vitamin A on hemoglobin response, growth, and  
33 diarrhea in young Peruvian children receiving iron therapy for anemia. *American Journal of*  
34 *Clinical Nutrition*. 2004; **80**(5): 1276-82.
- 35 54. Albert MJ, Qadri F, Wahed MA, Ahmed T, Rahman AS, Ahmed F, et al.  
36 Supplementation with zinc, but not vitamin A, improves seroconversion to vibriocidal  
37 antibody in children given an oral cholera vaccine. *The Journal of infectious diseases*; 2003.  
38 p. 909-13.
- 39 55. Qadri F, Ahmed T, Wahed MA, Ahmed F, Bhuiyan NA, Rahman AS, et al.  
40 Suppressive effect of zinc on antibody response to cholera toxin in children given the killed,  
41 B subunit-whole cell, oral cholera vaccine. *Vaccine*; 2004. p. 416-21.
- 42 56. Ba Lo N, Aaron GJ, Hess SY, Dossou NI, Guiro AT, Wade S, et al. Plasma zinc  
43 concentration responds to short-term zinc supplementation, but not zinc fortification, in  
44 young children in Senegal. *American Journal of Clinical Nutrition*. 2011; **93**(6): 1348-55.
- 45 57. Baqui AH, Zaman K, Persson LA, El Arifeen S, Yunus M, Begum N, et al.  
46 Simultaneous Weekly Supplementation of Iron and Zinc Is Associated with Lower  
47 Morbidity Due to Diarrhea and Acute Lower Respiratory Infection in Bangladeshi Infants.  
48 *Journal of Nutrition*. 2003; **133**(12): 4150-7.
- 49 58. Baqui AH, Walker CL, Zaman K, El Arifeen S, Chowdhury HR, Wahed MA, et al.  
50 Weekly iron supplementation does not block increases in serum zinc due to weekly zinc  
51 supplementation in Bangladeshi infants. *The Journal of nutrition*; 2005. p. 2187-91.
- 52 59. Black MM, Baqui AH, Zaman K, Ake Persson L, El Arifeen S, Le K, et al. Iron and  
53 zinc supplementation promote motor development and exploratory behavior among  
54 Bangladeshi infants. *The American journal of clinical nutrition*; 2004. p. 903-10.
- 55 60. Fischer Walker CL, Baqui AH, Ahmed S, Zaman K, El Arifeen S, Begum N, et al.  
56 Low-dose weekly supplementation of iron and/or zinc does not affect growth among  
57 Bangladeshi infants. *European Journal of Clinical Nutrition*. 2009; **63**(1): 87-92.

- 1  
2  
3  
4  
5  
6  
7  
8  
9  
10  
11  
12  
13  
14  
15  
16  
17  
18  
19  
20  
21  
22  
23  
24  
25  
26  
27  
28  
29  
30  
31  
32  
33  
34  
35  
36  
37  
38  
39  
40  
41  
42  
43  
44  
45  
46  
47  
48  
49  
50  
51  
52  
53  
54  
55  
56  
57  
58  
59  
60
61. Bhandari N, Bahl R, Taneja S, Strand T, Molbak K, Ulvik RJ, et al. Substantial reduction in severe diarrheal morbidity by daily zinc supplementation in young north Indian children. *Pediatrics*. 2002; **109**(6): e86.
62. Bhandari N, Bahl R, Taneja S, Strand T, Molbak K, Ulvik RJ, et al. Effect of routine zinc supplementation on pneumonia in children aged 6 months to 3 years: Randomised controlled trial in an urban slum. *British Medical Journal*. 2002; **324**(7350): 1358-61.
63. Manger MS, Strand TA, Taneja S, Refsum H, Ueland PM, Nygard O, et al. Cobalamin status modifies the effect of zinc supplementation on the incidence of prolonged diarrhea in 6- to 30-month-old North Indian children. *Journal of Nutrition*. 2011; **141**(6): 1108-13.
64. Manger MS, Taneja S, Strand TA, Ueland PM, Refsum H, Schneede J, et al. Poor folate status predicts persistent diarrhea in 6- to 30-month-old north Indian children. *The Journal of nutrition*; 2011. p. 2226-32.
65. Taneja S, Strand TA, Sommerfelt H, Rajiv B, Nita B. Zinc supplementation for four months does not affect growth in young north Indian children. *Journal of Nutrition*. 2010; **140**(3): 630-4.
66. Taneja S, Bhandari N, Bahl R, Bhan MK. Impact of zinc supplementation on mental and psychomotor scores of children aged 12 to 18 months: a randomized, double-blind trial. *Journal of Pediatrics*. 2005; **146**(4): 506-11.
67. Taneja S, Bhandari N, Strand TA, Sommerfelt H, Refsum H, Ueland PM, et al. Cobalamin and folate status in infants and young children in a low-to-middle income community in India. *The American journal of clinical nutrition*. 2007; **86**(5): 1302-9.
68. Bhan G, Bhandari N, Taneja S, Mazumder S, Bahl R. The effect of maternal education on gender bias in care-seeking for common childhood illnesses. *Social Science & Medicine*. 2005; **60**(4): 715-24.
69. Bhandari N, Taneja S, Mazumder S, Bahl R, Fontaine O, Bhan MK, et al. Adding zinc to supplemental iron and folic acid does not affect mortality and severe morbidity in young children. *Journal of Nutrition*. 2007; **137**(1): 112-7.
70. Arsenault JE. Dietary zinc intake of young children in Peru and the United States, and effects of supplemental zinc on energy intake, appetite, body composition, and plasma leptin, ghrelin, and insulin concentrations of Peruvian infants [3230603]. United States -- California: University of California, Davis; 2006.
71. Arsenault JE, De Romana DL, Penny ME, Van Loan MD, Brown KH. Additional zinc delivered in a liquid supplement, but not in a fortified porridge, increased fat-free mass accrual among young Peruvian children with mild-to-moderate stunting. *Journal of Nutrition*. 2008; **138**(1): 108-14.
72. Arsenault JE, Havel PJ, De Romana DL, Penny ME, Van Loan MD, Brown KH. Longitudinal measures of circulating leptin and ghrelin concentrations are associated with the growth of young Peruvian children but are not affected by zinc supplementation. *American Journal of Clinical Nutrition*. 2007; **86**(4): 1111-9.
73. Brown KH, De Romana DL, Arsenault JE, Peerson JM, Penny ME. Comparison of the effects of zinc delivered in a fortified food or a liquid supplement on the growth, morbidity, and plasma zinc concentrations of young Peruvian children. *American Journal of Clinical Nutrition*. 2007; **85**(2): 538-47.
74. Castillo-Duran C, Garcia H, Venegas P, Torrealba I, Panteon E, Concha N, et al. Zinc supplementation increases growth velocity of male children and adolescents with short stature. *Acta Paediatrica*. 1994; **83**(8): 833-7.
75. Castillo-Duran C, Hertrampf ED, Ruz MO, Torrejon CS, Salazar G. Controlled trial of zinc supplementation on growth and body composition in Chilean children from low income groups. *Pediatric Research*; 2002. p. 188a.
76. Cavan KR. The assessment of the zinc status of a group of school children from a peri-urban area of Guatemala City, Guatemala [NN70828]. Canada: University of Guelph (Canada); 1991.
77. Cavan KR, Gibson RS, Grazioso CF, Isalgue AM, Ruz M, Solomons NW. Growth and body composition of periurban Guatemalan children in relation to zinc status: a longitudinal zinc intervention trial. *American Journal of Clinical Nutrition*. 1993; **57**(3): 344-52.

- 1 78. Grazioso CF, Isalgue M, de Ramirez I, Ruz M, Solomons NW. The effect of zinc  
2 supplementation on parasitic reinfection of Guatemalan schoolchildren. *American Journal*  
3 *of Clinical Nutrition*. 1993; **57**(5): 673-8.
- 4 79. Chang S, El Arifeen S, Bari S, Wahed MA, Rahman KM, Rahman MT, et al.  
5 Supplementing iron and zinc: double blind, randomized evaluation of separate or combined  
6 delivery. *European Journal of Clinical Nutrition*; 2010. p. 153-60.
- 7 80. Chen L, Liu Y-F, Gong M, Jiang W, Fan Z, Qu P, et al. Effects of vitamin A, vitamin  
8 A plus zinc, and multiple micronutrients on anemia in preschool children in Chongqing,  
9 China. *Asia Pacific Journal of Clinical Nutrition*. 2012; **21**(1): 3-11.
- 10 81. Chhagan M. The effect of micronutrient supplementation on morbidity and growth in  
11 South African children [3351928]. United States -- Massachusetts: Tufts University, Gerald  
12 J. and Dorothy R. Friedman School of Nutrition Science and Policy; 2009.
- 13 82. Chhagan MK, Van den Broeck J, Luabeya K-KA, Mpontshane N, Tomkins A, Bennish  
14 ML. Effect on longitudinal growth and anemia of zinc or multiple micronutrients added to  
15 vitamin A: a randomized controlled trial in children aged 6-24 months. *BMC Public Health*.  
16 2010; **10**: 145.
- 17 83. Chhagan MK, Van den Broeck J, Luabeya KK, Mpontshane N, Tucker KL, Bennish  
18 ML. Effect of micronutrient supplementation on diarrhoeal disease among stunted children  
19 in rural South Africa. *European Journal of Clinical Nutrition*. 2009; **63**(7): 850-7.
- 20 84. Luabeya KK, Mpontshane N, Mackay M, Ward H, Elson I, Chhagan M, et al. Zinc or  
21 multiple micronutrient supplementation to reduce diarrhea and respiratory disease in South  
22 African children: a randomized controlled trial. *PLoS ONE [Electronic Resource]*. 2007;  
23 **2**(6): e541.
- 24 85. Van den Broeck J, Mackay M, Mpontshane N, Kany Kany Luabeya A, Chhagan M,  
25 Bennish ML. Maintaining data integrity in a rural clinical trial. *Clin Trials*. 2007; **4**(5): 572-  
26 82.
- 27 86. Clark PJ, Eastell R, Barker ME. Zinc supplementation and bone growth in pubertal  
28 girls. *Lancet*. 1999; **354**(9177): 485.
- 29 87. Cole CR, Sampaio DLB, de Mattos ÂP, Ribeiro TCM, de Q. Leite ME, Costa-Ribeiro  
30 H. Suplementação de Zinco e Outros Micronutrientes Através do Uso de "Sprinkles":  
31 Impacto na Ocorrência de Doença Diarreica e Infecções Respiratórias em Crianças  
32 Institucionalizadas. 2012.
- 33 88. Dehbozorgi P, Mohseni P, Mazloom Z. The influence of zinc sulfate supplementation  
34 on the growth of school age children in villages around Shiraz 2002, 2003. *Journal of*  
35 *Medical Sciences*. 2007; **7**(4): 690-3.
- 36 89. Bui VQ, Digirolamo AM, Stein AD, Ramakrishnan U, Ramirez-Zea M, Flores-Ayala  
37 RC, et al. No effect of 6-month zinc supplementation on anthropometric measures in 6-11  
38 year-old urban school children in Guatemala. *The FASEB Journal*. 2009; **23** (S1).
- 39 90. DiGirolamo AM, Ramirez-Zea M, Wang M, Flores-Ayala R, Martorell R, Neufeld  
40 LM, et al. Randomized trial of the effect of zinc supplementation on the mental health of  
41 school-age children in Guatemala. *American Journal of Clinical Nutrition*. 2010; **92**(5):  
42 1241-50.
- 43 91. Ebrahimi S, Pormahmodi A, Kamkar A. Study of zinc supplementation on growth of  
44 schoolchildren in Yasuj, Southwest of Iran. *Pakistan Journal of Nutrition*. 2006; **5**(4): 341-2.
- 45 92. Fallahi E, Kimiagar M, Nazari A, Hasanvand MA, Seifi M. Effect of zinc and iron  
46 supplementation on indicators of iron, zinc and vitamin A status of primary school children.  
47 *Pakistan Journal of Biological Sciences*. 2007; **10**(7): 1088-92.
- 48 93. APP. dF. Impacto antropométrico da suplementação semanal de zinco em escolares  
49 com déficit de crescimento: ensaio randomizado duplo-cego. São Paulo, Brazil:  
50 Universidade Federal de São Paulo; 2002.
- 51 94. Friis H, Ndhlovu P, Mduluzi T, Kaondera K, Sandstrom B, Michaelsen KF, et al. The  
52 impact of zinc supplementation on *Schistosoma mansoni* reinfection rate and intensities: a  
53 randomized, controlled trial among rural Zimbabwean schoolchildren. *European Journal of*  
54 *Clinical Nutrition*. 1997; **51**(1): 33-7.
- 55 95. Friis H, Ndhlovu P, Mduluzi T, Kaondera K, Sandstrom B, Michaelsen KF, et al. The  
56 impact of zinc supplementation on growth and body composition: a randomized, controlled  
57  
58  
59  
60

- 1 trial among rural Zimbabwean schoolchildren. *European Journal of Clinical Nutrition*. 1997;  
2 **51**(1): 38-45.
- 3 96. Garcia H, Ugarte F, Henriquez C, Iniquez G, Salazar T, Pizarro F, et al. Lack of effect  
4 of zinc supplementation on growth and somatotropic axis in children with idiopathic short  
5 stature and diminished growth velocity. [Spanish] Ausencia de efecto de la suplementacion  
6 con cinc sobre el crecimiento y el eje somatotrofico en ninos con talla baja idiopatica y  
7 velocidad de crecimiento disminuida. *Endocrinologia*. 1998; **45**(5): 183-7.
- 8 97. Gibson RS, Vanderkooy PD, MacDonald AC, Goldman A, Ryan BA, Berry M. A  
9 growth-limiting, mild zinc-deficiency syndrome in some southern Ontario boys with low  
10 height percentiles. *American Journal of Clinical Nutrition*. 1989; **49**(6): 1266-73.
- 11 98. Gracia B, Plata Cd, Rueda A, Mosquera M, Suarez MF, Pradilla A. Effect of zinc  
12 supplementation on growth velocity of pre school children. *Colombia Medica*. 2005;  
13 **36**(4(Suppl. 3)): 31-40.
- 14 99. Gupta DN, Mondal SK, Ghosh S, Rajendran K, Sur D, Manna B. Impact of zinc  
15 supplementation on diarrhoeal morbidity in rural children of West Bengal, India. *Acta*  
16 *Paediatrica*. 2003; **92**(5): 531-6.
- 17 100. Gupta DN, Krishnan R, Mondal SK, Subrata G, Bhattacharya SK. Operational  
18 feasibility of implementing community-based zinc supplementation: impact on childhood  
19 diarrheal morbidity. *Pediatric Infectious Disease Journal*. 2007; **26**(4): 306-10.
- 20 101. Hambidge KM, Chavez MN, Brown RM, Walravens PA. Zinc supplementation of  
21 low-income pre-school children. *Trace element metabolism in man and animals*. 1978; **3**:  
22 296-9.
- 23 102. Hambidge KM, Krebs NF, Walravens PA. Growth velocity of young children  
24 receiving a dietary zinc supplement. *Nutrition Research*. 1985; **5**(SUPPL. 1): S-306-S-16.
- 25 103. Han J, Yang Y, Shao X, He M, Bian L, Wang Z. Effect of micronutrient  
26 supplementation on the growth of preschool children in China. *Nutritional Sciences*. 2002;  
27 **5**(3): 155-60.
- 28 104. Yang Y-X, Han J-H, Shao X-P, He M, Bian L-H, Wang Z, et al. Effect of  
29 micronutrient supplementation on the growth of preschool children in China. *Biomed*  
30 *Environ Sci*. 2002; **15**(3): 196-202.
- 31 105. Hettiarachchi M, Liyanage C, Wickremasinghe R, Hilmers DC, Abrams SA. The  
32 efficacy of micronutrient supplementation in reducing the prevalence of anaemia and  
33 deficiencies of zinc and iron among adolescents in Sri Lanka. *European Journal of Clinical*  
34 *Nutrition*. 2008; **62**(7): 856-65.
- 35 106. Hong ZY. [Observation on the therapeutic effect of zinc on underweight children].  
36 *Chung Hua I Hsueh Tsa Chih*. 1982; **62**(7): 415-9.
- 37 107. Ince E, Kemahli S, Uysal Z, Akar N, Cin S, Arcasoy A. Mild zinc deficiency in  
38 preschool children. *Journal of Trace Elements in Experimental Medicine*; 1994. p. 135-41.
- 39 108. Kartasurya MI, Ahmed F, Subagio HW, Rahfiludin MZ, Marks GC. Zinc combined  
40 with vitamin A reduces upper respiratory tract infection morbidity in a randomised trial in  
41 preschool children in Indonesia. *British Journal of Nutrition*. 2012; **108**(12): 2251-60.
- 42 109. Kikafunda JK, Walker AF, Allan EF, Tumwine JK. Effect of zinc supplementation on  
43 growth and body composition of Ugandan preschool children: a randomized, controlled,  
44 intervention trial. *American Journal of Clinical Nutrition*. 1998; **68**(6): 1261-6.
- 45 110. Sandstead HH. Improving study design. *AmJ ClinNutr*; 1999. p. 110-1.
- 46 111. Solomons NW, Ruz M, Gibson RS. Single-nutrient interventions with zinc. *The*  
47 *American journal of clinical nutrition*. 1999; **70**(1): 111-3.
- 48 112. Kurugol Z, Akilli M, Bayram N, Koturoglu G. The prophylactic and therapeutic  
49 effectiveness of zinc sulphate on common cold in children. *Acta Paediatrica*. 2006; **95**(10):  
50 1175-81.
- 51 113. Larson CP, Nasrin D, Saha A, Chowdhury MI, Qadri F. The added benefit of zinc  
52 supplementation after zinc treatment of acute childhood diarrhoea: a randomized, double-  
53 blind field trial. *Trop Med Int Health*. 2010; **15**(6): 754-61.
- 54 114. Sheikh A, Soheli S, Ahmad SM, Nasrin D, Setarun N, Alam MM, et al. Zinc influences  
55 innate immune responses in children with enterotoxigenic *Escherichia coli* induced diarrhea.  
56 *Journal of Nutrition*. 2010; **140**(5): 1049-56.

115. Lind T. Iron and zinc in infancy: Results from experimental trials in Sweden and Indonesia [C816987]. Sweden: Umea Universitet (Sweden); 2004.
116. Lind T, Lonnerdal B, Stenlund H, Gamayanti IL, Ismail D, Seswandhana R, et al. A community-based randomized controlled trial of iron and zinc supplementation in Indonesian infants: effects on growth and development. *American Journal of Clinical Nutrition*. 2004; **80**(3): 729-36.
117. Lind T, Lonnerdal B, Stenlund H, Ismail D, Seswandhana R, Ekstrom E-C, et al. A community-based randomized controlled trial of iron and zinc supplementation in Indonesian infants: interactions between iron and zinc. *American Journal of Clinical Nutrition*. 2003; **77**(4): 883-90.
118. Lind T, Seswandhana R, Persson L-A, Lonnerdal B. Iron supplementation of iron-replete Indonesian infants is associated with reduced weight-for-age. *Acta Paediatrica*. 2008; **97**(6): 770-5.
119. Long KZ, Montoya Y, Hertzmark E, Santos JI, Rosado JL. A double-blind, randomized, clinical trial of the effect of vitamin A and zinc supplementation on diarrheal disease and respiratory tract infections in children in Mexico City, Mexico. *American Journal of Clinical Nutrition*. 2006; **83**(3): 693-700.
120. Long KZ, Rosado JL, Montoya Y, de Lourdes Solano M, Hertzmark E, DuPont HL, et al. Effect of vitamin A and zinc supplementation on gastrointestinal parasitic infections among Mexican children. *Pediatrics*. 2007; **120**(4): e846-55.
121. Rosado JL, Caamano MC, Montoya YA, de Lourdes Solano M, Santos JI, Long KZ. Interaction of zinc or vitamin A supplementation and specific parasite infections on Mexican infants' growth: a randomized clinical trial. *European Journal of Clinical Nutrition*. 2009; **63**(10): 1176-84.
122. Sanchez-Hernandez JJ, Long K, Al Mamun A, Rosado JL, Del Carmen Caamano M, Marks G. Nutritional status as a modifier of the effect of vitamin a or zinc supplementation on gastrointestinal parasite infections in Mexican children. *FASEB Journal Conference: Experimental Biology*. 2011; **20110409**(20110413).
123. Mahloudji M, Reinhold JG, Haghshenass M, Ronaghy HA, Fox MR, Halsted JA. Combined zinc and iron compared with iron supplementation of diets of 6- to 12-year old village schoolchildren in southern Iran. *American Journal of Clinical Nutrition*. 1975; **28**(7): 721-5.
124. Malik A, Taneja S. Report on the trial for Effect of Short Course Prophylactic Zinc Supplementation of 2 weeks on diarrhea morbidity in Infants of 6-11 months of age. 2013.
125. Marinho HA, Shrimpton R, Giugliano R, Burini RC. Influence of enteral parasites on the blood vitamin A levels in preschool children orally supplemented with retinol and/or zinc. *European Journal of Clinical Nutrition*. 1991; **45**(11): 539-44.
126. Mazariegos M, Hambidge KM, Westcott JE, Solomons NW, Raboy V, Das A, et al. Neither a zinc supplement nor phytate-reduced maize nor their combination enhance growth of 6- to 12-month-old Guatemalan infants. *Journal of Nutrition*. 2010; **140**(5): 1041-8.
127. Meeks Gardner J, Witter M, Ramdath D. Zinc supplementation morbidity and growth in stunted Jamaican children [abstract]. *West Indian Medical Journal*; 1998. p. 28-9.
128. Meeks Gardner J, Witter MM, Ramdath DD. Zinc supplementation: effects on the growth and morbidity of undernourished Jamaican children. *European Journal of Clinical Nutrition*. 1998; **52**(1): 34-9.
129. Meeks Gardner JM, Powell CA, Baker-Henningham H, Walker SP, Cole TJ, Grantham-McGregor SM. Zinc supplementation and psychosocial stimulation: effects on the development of undernourished Jamaican children. *American Journal of Clinical Nutrition*. 2005; **82**(2): 399-405.
130. Mozaffari-Khosravi H, Shakiba M, Eftekhari MH, Vahidi AR. Effects of zinc supplementation on the physical growth of 2-5 years old children. *Iranian Journal of Endocrinology and Metabolism*. 2008; **10**(4): Pe363-Pe71, En417.
131. Mozaffari-Khosravi H, Shakiba M, Eftekhari MH, Fatehi F. Effects of zinc supplementation on physical growth in 2-5-year-old children. *Biological Trace Element Research*. 2009; **128**(2): 118-27.

132. Garenne M, Becher H, Ye Y, Kouyate B, Muller O. Sex-specific responses to zinc supplementation in Nouna, Burkina Faso. *Journal of Pediatric Gastroenterology & Nutrition*. 2007; **44**(5): 619-28.
133. Muller O, Becher H, van Zweeden AB, Ye Y, Diallo DA, Konate AT, et al. Effect of zinc supplementation on malaria and other causes of morbidity in west African children: randomised double blind placebo controlled trial. *BMJ*. 2001; **322**(7302): 1567.
134. Muller O, Garenne M, Reitmaier P, Baltussen van Zweeden A, Kouyate B, Becher H. Effect of zinc supplementation on growth in West African children: A randomized double-blind placebo-controlled trial in rural Burkina Faso. *International Journal of Epidemiology*. 2003; **32**(6): 1098-102.
135. Nakamura T, Nishiyama S, Futagoishi-Suginohara Y, Matsuda I, Higashi A. Mild to moderate zinc deficiency in short children: effect of zinc supplementation on linear growth velocity. *Journal of Pediatrics*. 1993; **123**(1): 65-9.
136. Ninh NX, Thissen JP, Collette L, Gerard G, Khoi HH, Ketelslegers JM. Zinc supplementation increases growth and circulating insulin-like growth factor I (IGF-I) in growth-retarded Vietnamese children. *American Journal of Clinical Nutrition*. 1996; **63**(4): 514-9.
137. Penny ME, Marin RM, Duran A, Peerson JM, Lanata CF, Lonnerdal B, et al. Randomized controlled trial of the effect of daily supplementation with zinc or multiple micronutrients on the morbidity, growth, and micronutrient status of young Peruvian children. *American Journal of Clinical Nutrition*. 2004; **79**(3): 457-65.
138. Penny ME, Peerson JM, Marin RM, Duran A, Lanata CF, Lonnerdal B, et al. Randomized, community-based trial of the effect of zinc supplementation, with and without other micronutrients, on the duration of persistent childhood diarrhea in Lima, Peru. *Journal of Pediatrics*. 1999; **135**(2 I): 208-17.
139. Rahman MM. Effect of simultaneous zinc and vitamin A supplementation on the biochemical indices of vitamin A nutriture, morbidity, and growth in Bangladeshi children: A randomized, double blind, placebo controlled trial [9968167]. United States -- Alabama: The University of Alabama at Birmingham School of Public Health; 1999.
140. Rahman MM, Tofail F, Wahed MA, Fuchs GJ, Baqui AH, Alvarez JO. Short-term supplementation with zinc and vitamin A has no significant effect on the growth of undernourished Bangladeshi children. *American Journal of Clinical Nutrition*. 2002; **75**(1): 87-91.
141. Rahman MM, Vermund SH, Wahed MA, Fuchs GJ, Baqui AH, Alvarez JO. Simultaneous zinc and vitamin A supplementation in Bangladeshi children: randomised double blind controlled trial. *BMJ*. 2001; **323**(7308): 314-8.
142. Rahman MM, Wahed MA, Fuchs GJ, Baqui AH, Alvarez JO. Synergistic effect of zinc and vitamin A on the biochemical indexes of vitamin A nutrition in children. *American Journal of Clinical Nutrition*. 2002; **75**(1): 92-8.
143. Richard SA, Zavaleta N, Caulfield LE, Black RE, Witzig RS, Shankar AH. Zinc and iron supplementation and malaria, diarrhea, and respiratory infections in children in the Peruvian Amazon. *Am J Trop Med Hyg*. 2006; **75**(1): 126-32.
144. Allen LH, Rosado JL, Casterline JE, Lopez P, Munoz E, Garcia OP, et al. Lack of hemoglobin response to iron supplementation in anemic mexican preschoolers with multiple micronutrient deficiencies. *American Journal of Clinical Nutrition*. 2000; **71**(6): 1485-94.
145. Munoz EC, Rosado JL, Lopez P, Furr HC, Allen LH. Iron and zinc supplementation improves indicators of vitamin A status of Mexican preschoolers. *American Journal of Clinical Nutrition*. 2000; **71**(3): 789-94.
146. Rosado JL, Lopez P, Munoz E, Martinez H, Allen LH. Zinc supplementation reduced morbidity, but neither zinc nor iron supplementation affected growth or body composition of Mexican preschoolers. *American Journal of Clinical Nutrition*. 1997; **65**(1): 13-9.
147. Rosales FJ, Kang Y, Pfeiffer B, Rau A, Romero-Abal ME, Erhardt JG, et al. Twice the recommended daily allowance of iron is associated with an increase in plasma alpha-1 antichymotrypsin concentrations in Guatemalan school-aged children. *Nutrition Research*. 2004; **24**(11): 875-87.

148. Bentley ME, Caulfield LE, Malathi R, Santizo MC, Hurtado E, Rivera JA, et al. Zinc supplementation affects the activity patterns of rural Guatemalan infants. *Journal of Nutrition*. 1997; **127**(7): 1333-8.
149. Rivera JA, Ruel MT, Santizo MC, Lonnerdal B, Brown KH. Zinc supplementation improves the growth of stunted rural Guatemalan infants. *Journal of Nutrition*. 1998; **128**(3): 556-62.
150. Ruel MT, Rivera JA, Santizo MC, Lonnerdal B, Brown KH. Impact of zinc supplementation on morbidity from diarrhea and respiratory infections among rural Guatemalan children. *Pediatrics*. 1997; **99**(6): 808-13.
151. Ruz M, Castillo-Duran C, Lara X, Codoceo J, Rebolledo A, Alalah E. A 14-mo zinc-supplementation trial in apparently healthy Chilean preschool children. *American Journal of Clinical Nutrition*. 1997; **66**(6): 1406-13.
152. Penland JG, Sandstead HH, Alcock NW, Dayal HH, Chen XC, Li JS, et al. A preliminary report: effects of zinc and micronutrient repletion on growth and neuropsychological function of urban Chinese children. *Journal of the American College of Nutrition*. 1997; **16**(3): 268-72.
153. Sandstead HH, Penland JG, Alcock NW, Dayal HH, Chen XC, Li JS, et al. Effects of repletion with zinc and other micronutrients on neuropsychologic performance and growth of Chinese children. *American Journal of Clinical Nutrition*. 1998; **68**(Supplement 2): 470S-5S.
154. Sandstead HH, Prasad AS, Penland JG, Beck FWJ, Kaplan J, Egger NG, et al. Zinc deficiency in Mexican American children: influence of zinc and other micronutrients on T cells, cytokines, and antiinflammatory plasma proteins. *American Journal of Clinical Nutrition*. 2008; **88**(4): 1067-73.
155. Sanjur D, Garcia A, Aguilar R, Furumoto R, Mort M. Dietary patterns and nutrient intakes of toddlers from low-income families in Denver, Colorado. *Journal of the American Dietetic Association*. 1990; **90**(6): 823-9.
156. Sayeg Porto MA, Oliveira HP, Cunha AJ, Miranda G, Guimarães MM, Oliveira WA, et al. Linear growth and zinc supplementation in children with short stature. *Journal of pediatric endocrinology & metabolism : JPEM*; 2000. p. 1121-8.
157. Chugh K. Zinc therapy in acute diarrhea. *Indian Pediatrics*. 1996; **33**(4): 352.
158. Dhingra U, Hiremath G, Menon VP, Dhingra P, Sarkar A, Sazawal S. Zinc deficiency: descriptive epidemiology and morbidity among preschool children in peri-urban population in Delhi, India. *J Health Popul Nutr*. 2009; **27**(5): 632-9.
159. Sazawal S, Bentley M, Black RE, Dhingra P, George S, Bhan MK. Effect of zinc supplementation on observed activity in low socioeconomic Indian preschool children. *Pediatrics*. 1996; **98**(6): 1132-7.
160. Sazawal S, Black RE, Bhan MK, Bhandari N, Sinha A, Jalla S. Zinc supplementation in young children with acute diarrhea in India. *New England Journal of Medicine*. 1995; **333**(13): 839-44.
161. Sazawal S. Effect of zinc supplementation on diarrheal morbidity among urban slum children in India [9617598]. United States -- Maryland: The Johns Hopkins University; 1996.
162. Sazawal S, Black RE, Bhan MK, Jalla S, Bhandari N, Sinha A, et al. Zinc supplementation reduces the incidence of persistent diarrhea and dysentery among low socioeconomic children in India. *Journal of Nutrition*. 1996; **126**(2): 443-50.
163. Sazawal S, Black RE, Bhan MK, Jalla S, Sinha A, Bhandari N. Efficacy of zinc supplementation in reducing the incidence and prevalence of acute diarrhea- a community-based, double-blind, controlled trial. *American Journal of Clinical Nutrition*. 1997; **66**(2): 413-8.
164. Sazawal S, Black RE, Jalla S, Mazumdar S, Sinha A, Bhan MK. Zinc supplementation reduces the incidence of acute lower respiratory infections in infants and preschool children: A double-blind, controlled trial. *Pediatrics*. 1998; **102**(1 I): 1-5.
165. Sazawal S, Dhingra U, Deb S, Bhan MK, Menon VP, Black RE. Effect of zinc added to multi-vitamin supplementation containing low-dose vitamin A on plasma retinol level in children--a double-blind randomized, controlled trial. *J Health Popul Nutr*. 2007; **25**(1): 62-6.



166. Sazawal S, Jalla S, Mazumder S, Sinha A, Black RE, Bhan MK. Effect of zinc supplementation on cell-mediated immunity and lymphocyte subsets in preschool children. *Indian Pediatrics*. 1997; **34**(7): 589-97.
167. Sazawal S, Black RE, Ramsan M, Chwaya HM, Dutta A, Dhingra U, et al. Effect of zinc supplementation on mortality in children aged 1-48 months: a community-based randomised placebo-controlled trial. *Lancet*. 2007; **369**(9565): 927-34.
168. Sazawal S, Black RE, Ramsan M, Chwaya HM, Stoltzfus RJ, Dutta A, et al. Effects of routine prophylactic supplementation with iron and folic acid on admission to hospital and mortality in preschool children in a high malaria transmission setting: community-based, randomised, placebo-controlled trial.[Erratum appears in *Lancet*. 2006 Jan 28;367(9507):302]. *Lancet*. 2006; **367**(9505): 133-43.
169. de Benoist B, Darnton-Hill I, Lynch S, Allen L, Savioli L. Zinc and iron supplementation trials in Nepal and Tanzania. *Lancet*. 2006; **367**(9513): 816.
170. Kordas K, Siegel EH, Olney DK, Katz J, Tielsch JM, Kariger PK, et al. The effects of iron and/or zinc supplementation on maternal reports of sleep in infants from Nepal and Zanzibar. *J Dev Behav Pediatr*. 2009; **30**(2): 131-9.
171. Olney DK, Pollitt E, Kariger PK, Khalfan SS, Ali NS, Tielsch JM, et al. Combined iron and folic acid supplementation with or without zinc reduces time to walking unassisted among Zanzibari infants 5- to 11-mo old. *Journal of Nutrition*. 2006; **136**(9): 2427-34.
172. Kariger PK, Stoltzfus RJ, Olney D, Sazawal S, Black R, Tielsch JM, et al. Iron deficiency and physical growth predict attainment of walking but not crawling in poorly nourished Zanzibari infants. *The Journal of nutrition*. 2005; **135**(4): 814-9.
173. Kordas K, Siegel EH, Olney DK, Katz J, Tielsch JM, Chwaya HM, et al. Maternal reports of sleep in 6-18 month-old infants from Nepal and Zanzibar: association with iron deficiency anemia and stunting. *Early Human Development*. 2008; **84**(6): 389-98.
174. DK. O. Modeling The Effects Of Anemia, Malaria, Growth And Micronutrient Supplementation On Development Of Young Zanzibari Children. Davis, CA: University of California, Davis; 2006.
175. Olney DK, Pollitt E, Kariger PK, Khalfan SS, Ali NS, Tielsch JM, et al. Young Zanzibari children with iron deficiency, iron deficiency anemia, stunting, or malaria have lower motor activity scores and spend less time in locomotion. *The Journal of nutrition*. 2007; **137**(12): 2756-62.
176. Olney DK KP, Stoltzfus RJ, Khalfan SS, Ali NS, Tielsch JM, et al. Development of nutritionally at-risk young children is predicted by malaria, anemia, and stunting in Pemba, Zanzibar. *Journal of Nutrition* 2009; **139**(4): 763-72.
177. Schultink W, Merzenich M, Gross R, Shrimpton R, Dillon D. Effects of iron-zinc supplementation on the iron, zinc, and vitamin A status of anaemic pre-school children in Indonesia. *Food and Nutrition Bulletin*. 1997; **18**(4): 311-7.
178. Correa León E TM, Navarrete F, Aguirre L, Saa B. Deficiencia De Zinc E Inmunidad Celular. Quito, Ecuador: FCM; 1992.
179. Sempertegui F, Estrella B, Correa E, Aguirre L, Saa B, Torres M, et al. Effects of short-term zinc supplementation on cellular immunity, respiratory symptoms, and growth of malnourished Equadorian children. *European Journal of Clinical Nutrition*. 1996; **50**(1): 42-6.
180. Shah U, Malik MA, Alam S, Shaheen A, Mohammad R, AlTannir M. The efficacy of zinc supplementation in young children with recurrent acute lower respiratory infections: A randomized double-blind placebo controlled trial. *Journal of Paediatrics and Child Health*. 2011; **47**: 13.
181. Shankar AH, Genton B, Baisor M, Jaino P, Tamja S, Adiguma T, et al. The influence of zinc supplementation on morbidity due to *Plasmodium falciparum*: A randomized trial in preschool children in Papua New Guinea. *American Journal of Tropical Medicine and Hygiene*. 2000; **62**(6): 663-9.
182. Shankar AH GB, Tamja S, Arnold S, Wu L, Baisor M, et al. Zinc supplementation can reduce malaria-related morbidity in preschool children. *American Journal of Tropical Medicine and Hygiene*. 1997; **57**(Supplement 3): 249 (Abstract 434).
183. Silva APR, Vitolo MR, Zara LF, Castro CFS. Efeito da suplementação de zinco a crianças de 1 a 5 anos de idade. *J pediatr (Rio J)*. 2006; **82**(3): 227-31.

184. Smith JC, Makdani D, Hegar A, Rao D, Douglass LW. Vitamin A and zinc supplementation of preschool children. *Journal of the American College of Nutrition*; 1999. p. 213-22.
185. Soofi S, Cousens S, Iqbal SP, Akhund T, Khan J, Ahmed I, et al. Effect of provision of daily zinc and iron with several micronutrients on growth and morbidity among young children in Pakistan: a cluster-randomised trial. *Lancet*. 2013.
186. Coles CL, Sherchand JB, Khatri SK, Katz J, Leclercq SC, Mullany LC, et al. Zinc modifies the association between nasopharyngeal *Streptococcus pneumoniae* carriage and risk of acute lower respiratory infection among young children in rural Nepal. *Journal of Nutrition*. 2008; **138**(12): 2462-7.
187. Katz J, Khatri SK, Leclercq SC, Mullany LC, Yanik EL, Stoltzfus RJ, et al. Daily supplementation with iron plus folic acid, zinc, and their combination is not associated with younger age at first walking unassisted in malnourished preschool children from a deficient population in rural Nepal. *Journal of Nutrition*. 2010; **140**(7): 1317-21.
188. Murray-Kolb LE, Khatri SK, Katz J, Schaefer BA, Cole PM, Le Clerq SC, et al. Preschool micronutrient supplementation effects on intellectual and motor function in school-aged nepalese children. *Archives of Pediatrics and Adolescent Medicine*. 2012; **166**(5): 404-10.
189. Siegel EH. Anemia, motor development, and cognition: A randomized trial of iron-folic acid and/or zinc supplementation in young Nepali children [3172698]. United States -- Maryland: The Johns Hopkins University; 2005.
190. Siegel EH, Kordas K, Stoltzfus RJ, Katz J, Khatri SK, LeClerq SC, et al. Inconsistent effects of iron-folic acid and/or zinc supplementation on the cognitive development of infants. *Journal of health, population, and nutrition*. 2011; **29**(6): 593-604.
191. Surkan PJ, Shankar M, Katz J, Siegel EH, Leclercq SC, Khatri SK, et al. Beneficial effects of zinc supplementation on head circumference of Nepalese infants and toddlers: a randomized controlled trial. *European Journal of Clinical Nutrition*. 2012; **66**(7): 836-42.
192. Tielsch JM, Khatri SK, Stoltzfus RJ, Katz J, LeClerq SC, Adhikari R, et al. Effect of daily zinc supplementation on child mortality in southern Nepal: a community-based, cluster randomised, placebo-controlled trial. *Lancet*. 2007; **370**(9594): 1230-9.
193. Tielsch JM, Khatri SK, Stoltzfus RJ, Katz J, LeClerq SC, Adhikari R, et al. Effect of routine prophylactic supplementation with iron and folic acid on preschool child mortality in southern Nepal: community-based, cluster-randomised, placebo-controlled trial. *Lancet*. 2006; **367**(9505): 144-52.
194. Tupe RP, Chiplonkar SA. Zinc supplementation improved cognitive performance and taste acuity in Indian adolescent girls. *Journal of the American College of Nutrition*. 2009; **28**(4): 388-96.
195. Chiplonkar SA, Kawade R. Effect of zinc- and micronutrient-rich food supplements on zinc and vitamin A status of adolescent girls. *Nutrition*. 2012; **28**(5): 551-8.
196. Uçkarde, Y., Tekçiçek M, Ozmert EN, Yurdakök K. The effect of systemic zinc supplementation on oral health in low socioeconomic level children. *The Turkish journal of pediatrics*; 2009. p. 424-8.
197. Uckardes Y, Ozmert EN, Unal F, Yurdakök K. Effects of zinc supplementation on parent and teacher behaviour rating scores in low socioeconomic level Turkish primary school children. *Acta Paediatrica*. 2009; **98**(4): 731-6.
198. Uckardes Y, Ozmert EN, Unal F, Yurdakök K. The effect of zinc supplementation on Hacettepe Psychological Adaptation Scale scores in low socioeconomic level primary school children. *Cocuk Saglig ve Hastaliklar Dergisi*. 2009; **52**(2): 53-9.
199. Kramer TR, Udomkesmalee E, Dhanamitta S, Sirisinha S, Charoenkiatkul S, Tuntipopipat S, et al. Lymphocyte responsiveness of children supplemented with vitamin A and zinc. *American Journal of Clinical Nutrition*. 1993; **58**(4): 566-70.
200. Udomkesmalee E, Dhanamitta S, Sirisinha S. Effect of vitamin A and zinc supplementation on the nutriture of children in northeast Thailand. *American Journal of Clinical Nutrition*. 1992; **56**(1): 50-7.
201. Gibson RS. Zinc supplementation for infants. *Lancet*. 2000; **355**(9220): 2008-9.
202. Umeta M, West CE, Haidar J. Zinc supplements increased growth more in stunted infants than in non-stunted infants. *Evidence-Based Medicine*. 2001; **6**(2): 50.

- 1  
2  
3  
4  
5  
6  
7  
8  
9  
10  
11  
12  
13  
14  
15  
16  
17  
18  
19  
20  
21  
22  
23  
24  
25  
26  
27  
28  
29  
30  
31  
32  
33  
34  
35  
36  
37  
38  
39  
40  
41  
42  
43  
44  
45  
46  
47  
48  
49  
50  
51  
52  
53  
54  
55  
56  
57  
58  
59  
60
203. Umeta M, West CE, Haidar J, Deurenberg P, Hautvast JG. Zinc supplementation and stunted infants in Ethiopia: a randomised controlled trial. *Lancet*. 2000; **355**(9220): 2021-6.
204. Vakili R, Vahedian M, Khodaei GH, Mahmoudi M. Effects of zinc supplementation in occurrence and duration of common cold in school aged children during cold season: A double-blind placebo-controlled Trial. *Iranian Journal of Pediatrics*. 2009; **19**(4): 376-80.
205. Veenemans J. Effect of preventive supplementation with zinc and other micronutrients on malaria and diarrhoeal morbidity in African children [Thesis]. Wageningen, Netherlands: Wageningen University; 2011.
206. Veenemans J, Mank T, Ottenhof M, Baidjoe A, Mbugi EV, Demir AY, et al. Protection against diarrhea associated with *Giardia intestinalis* Is lost with multi-nutrient supplementation: a study in Tanzanian children. *PLoS neglected tropical diseases*. 2011; **5**(6): e1158.
207. Veenemans J, Milligan P, Prentice AM, Schouten LR, Inja N, Heijden AC, et al. Effect of supplementation with zinc and other micronutrients on malaria in Tanzanian children: a randomised trial. *PLoS medicine*; 2011. p. e1001125.
208. Veenemans J, Schouten LRA, Ottenhof MJ, Mank TG, Uges DRA, Mbugi EV, et al. Effect of preventive supplementation with zinc and other micronutrients on non-malarial morbidity in Tanzanian pre-school children: a randomized trial. *PLoS ONE [Electronic Resource]*. 2012; **7**(8): e41630.
209. Krebs NF, Hambidge KM, Walravens PA. Increased food intake of young children receiving a zinc supplement. *American Journal of Diseases of Children*. 1984; **138**(3): 270-3.
210. Walravens PA, Krebs NF, Hambidge KM. Linear growth of low income preschool children receiving a zinc supplement. *American Journal of Clinical Nutrition*. 1983; **38**(2): 195-201.
211. Walravens PA, Hambidge KM, Koepfer DM. Zinc supplementation in infants with a nutritional pattern of failure to thrive: A double-blind, controlled study. *Pediatrics*. 1989; **83**(4): 532-8.
212. Wessells R OZ, Rouamba N, Hess SY, Ouedraogo JB, Brown KH. The effect of zinc supplementation, provided as either a liquid ZnSO4 solution or a dispersible tablet, on plasma zinc concentration among young Burkinabe children. *FASEB Journal Conference: Experimental Biology*. 2011; **25:236.1**(236): 1.
213. Wessells KR, Ouedraogo ZP, Rouamba N, Hess SY, Ouedraogo J-B, Brown KH. Short-term zinc supplementation with dispersible tablets or zinc sulfate solution yields similar positive effects on plasma zinc concentration of young children in Burkina Faso: a randomized controlled trial. *Journal of Pediatrics*. 2012; **160**(1): 129-35.e3.
214. Wuehler SE, Sempertegui F, Brown KH. Dose-response trial of prophylactic zinc supplements, with or without copper, in young Ecuadorian children at risk of zinc deficiency. *American Journal of Clinical Nutrition*. 2008; **87**(3): 723-33.
215. Wuehler S. Estimation of the global risk of zinc deficiency and assessment of the impact of three doses of zinc supplementation, with or without copper, on markers of zinc and copper status, morbidity and growth among young Ecuadorian children [0819713]. United States -- California: University of California, Davis; 2007.



# PRISMA 2009 Checklist

| Section/topic                      | #  | Checklist item                                                                                                                                                                                                                                                                                              | Reported on page # |
|------------------------------------|----|-------------------------------------------------------------------------------------------------------------------------------------------------------------------------------------------------------------------------------------------------------------------------------------------------------------|--------------------|
| <b>TITLE</b>                       |    |                                                                                                                                                                                                                                                                                                             |                    |
| Title                              | 1  | Identify the report as a systematic review, meta-analysis, or both.                                                                                                                                                                                                                                         | 1                  |
| <b>ABSTRACT</b>                    |    |                                                                                                                                                                                                                                                                                                             |                    |
| Structured summary                 | 2  | Provide a structured summary including, as applicable: background; objectives; data sources; study eligibility criteria, participants, and interventions; study appraisal and synthesis methods; results; limitations; conclusions and implications of key findings; systematic review registration number. | 2                  |
| <b>INTRODUCTION</b>                |    |                                                                                                                                                                                                                                                                                                             |                    |
| Rationale                          | 3  | Describe the rationale for the review in the context of what is already known.                                                                                                                                                                                                                              | 3                  |
| Objectives                         | 4  | Provide an explicit statement of questions being addressed with reference to participants, interventions, comparisons, outcomes, and study design (PICOS).                                                                                                                                                  | 3                  |
| <b>METHODS</b>                     |    |                                                                                                                                                                                                                                                                                                             |                    |
| Protocol and registration          | 5  | Indicate if a review protocol exists, if and where it can be accessed (e.g., Web address), and, if available, provide registration information including registration number.                                                                                                                               | 3                  |
| Eligibility criteria               | 6  | Specify study characteristics (e.g., PICOS, length of follow-up) and report characteristics (e.g., years considered, language, publication status) used as criteria for eligibility, giving rationale.                                                                                                      | 3                  |
| Information sources                | 7  | Describe all information sources (e.g., databases with dates of coverage, contact with study authors to identify additional studies) in the search and date last searched.                                                                                                                                  | 3, App 1           |
| Search                             | 8  | Present full electronic search strategy for at least one database, including any limits used, such that it could be repeated.                                                                                                                                                                               | App 1              |
| Study selection                    | 9  | State the process for selecting studies (i.e., screening, eligibility, included in systematic review, and, if applicable, included in the meta-analysis).                                                                                                                                                   | 3                  |
| Data collection process            | 10 | Describe method of data extraction from reports (e.g., piloted forms, independently, in duplicate) and any processes for obtaining and confirming data from investigators.                                                                                                                                  | 3                  |
| Data items                         | 11 | List and define all variables for which data were sought (e.g., PICOS, funding sources) and any assumptions and simplifications made.                                                                                                                                                                       | 3                  |
| Risk of bias in individual studies | 12 | Describe methods used for assessing risk of bias of individual studies (including specification of whether this was done at the study or outcome level), and how this information is to be used in any data synthesis.                                                                                      | 3, 5               |
| Summary measures                   | 13 | State the principal summary measures (e.g., risk ratio, difference in means).                                                                                                                                                                                                                               | 3                  |
| Synthesis of results               | 14 | Describe the methods of handling data and combining results of studies, if done, including measures of consistency (e.g., $I^2$ for each meta-analysis).                                                                                                                                                    | 3                  |

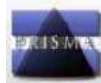

# PRISMA 2009 Checklist

Page 1 of 2

| Section/topic                 | #  | Checklist item                                                                                                                                                                                           | Reported on page #        |
|-------------------------------|----|----------------------------------------------------------------------------------------------------------------------------------------------------------------------------------------------------------|---------------------------|
| Risk of bias across studies   | 15 | Specify any assessment of risk of bias that may affect the cumulative evidence (e.g., publication bias, selective reporting within studies).                                                             | 4                         |
| Additional analyses           | 16 | Describe methods of additional analyses (e.g., sensitivity or subgroup analyses, meta-regression), if done, indicating which were pre-specified.                                                         | 3, 5-6                    |
| <b>RESULTS</b>                |    |                                                                                                                                                                                                          |                           |
| Study selection               | 17 | Give numbers of studies screened, assessed for eligibility, and included in the review, with reasons for exclusions at each stage, ideally with a flow diagram.                                          | 4, Fig 1                  |
| Study characteristics         | 18 | For each study, present characteristics for which data were extracted (e.g., study size, PICOS, follow-up period) and provide the citations.                                                             | App 4                     |
| Risk of bias within studies   | 19 | Present data on risk of bias of each study and, if available, any outcome level assessment (see item 12).                                                                                                | App 5                     |
| Results of individual studies | 20 | For all outcomes considered (benefits or harms), present, for each study: (a) simple summary data for each intervention group (b) effect estimates and confidence intervals, ideally with a forest plot. | Fig 3 to 5, App 7         |
| Synthesis of results          | 21 | Present results of each meta-analysis done, including confidence intervals and measures of consistency.                                                                                                  | 4-5, Table 2-3            |
| Risk of bias across studies   | 22 | Present results of any assessment of risk of bias across studies (see Item 15).                                                                                                                          | 4, Fig 2                  |
| Additional analysis           | 23 | Give results of additional analyses, if done (e.g., sensitivity or subgroup analyses, meta-regression [see Item 16]).                                                                                    | 5-6, Table 4, App 6 and 8 |
| <b>DISCUSSION</b>             |    |                                                                                                                                                                                                          |                           |
| Summary of evidence           | 24 | Summarize the main findings including the strength of evidence for each main outcome; consider their relevance to key groups (e.g., healthcare providers, users, and policy makers).                     | 6-7                       |
| Limitations                   | 25 | Discuss limitations at study and outcome level (e.g., risk of bias), and at review-level (e.g., incomplete retrieval of identified research, reporting bias).                                            | 6-7                       |
| Conclusions                   | 26 | Provide a general interpretation of the results in the context of other evidence, and implications for future research.                                                                                  | 7                         |
| <b>FUNDING</b>                |    |                                                                                                                                                                                                          |                           |
| Funding                       | 27 | Describe sources of funding for the systematic review and other support (e.g., supply of data); role of funders for the systematic review.                                                               | 2                         |



# PRISMA 2009 Checklist

- 1
- 2
- 3
- 4
- 5
- 6
- 7
- 8
- 9
- 10
- 11
- 12
- 13
- 14
- 15
- 16
- 17
- 18
- 19
- 20
- 21
- 22
- 23
- 24
- 25
- 26
- 27
- 28
- 29
- 30
- 31
- 32
- 33
- 34
- 35
- 36
- 37
- 38
- 39
- 40
- 41
- 42
- 43
- 44
- 45
- 46
- 47
- 48
- 49

For more information, visit: [www.prisma-statement.org](http://www.prisma-statement.org).

Page 2 of 2

For peer review only
